# Supplementary material for: Sox17 and β-catenin co-occupy Wnt-responsive enhancers to govern the endoderm gene regulatory network
Source: eLife. 2020 Sep 7;9:e58029. doi: 10.7554/eLife.58029 (PMC7498262; doi:10.7554/eLife.58029)
Supplement: Supplementary file 1. — An excel spread sheet of differentially expressed genes from RNA-sequencing of control and Sox17-MO embryos across stages NF 9–12 and associated metadata annotations. [file elife-58029-supp1.xlsx]

## Sheet: Sheet1
Gene ID_Xentrop v9.0	Gene_Symbol_Xenbase	TF	Stage_Annotation	Regional Enrichment	St9_LogFC	St9.5_LogFC	St10_LogFC	St10.5_LogFC	St11_LogFC	St12_LogFC	ChIP peaks
Xetrov90027473m.g	a2ml1		Late_Activated	Not Enriched in any Gastrula Dissections	-0.0641566	0.969716	-0.384517	-0.249103	-0.413384	-1.51075	scaffold_244:41901-42210
Xetrov90025203m.g	abca5		Late_Repressed	VegetalMass_Avg	-0.116088	1.95783	0.618976	0.196547	1.32542	1.41481	NA
Xetrov90003108m.g	abcb9		Late_Activated	Not Enriched in any Gastrula Dissections	-0.50982	-0.01435	-1.15415	-1.10494	-0.462386	-0.512308	Chr01:152798104-152798324
Xetrov90001990m.g	abhd8		Late_Activated	VegetalMass_Avg	NA	NA	-0.833953	-1.98559	-3.1068	-1.48166	NA
Xetrov90018515m.g	acap3		Late_Repressed	VegetalMass_Avg	0.0851523	-0.19343	-0.0399853	1.34277	-0.5566	-0.312696	Chr07:69747003-69747754,Chr07:69759134-69759858
Xetrov90024839m.g	ace		Early_Repressed	AnimalCap_Avg	NA	-0.378761	2.06652	0.46814	0.133986	0.198165	NA
Xetrov90009901m.g	ache		Late_Repressed	VegetalMass_Avg	-0.086179	0.0854009	-0.10712	0.542503	1.6557	1.40211	NA
Xetrov90009759m.g	acp5		Late_Activated	Not Enriched in any Gastrula Dissections	-0.0602869	-0.0510088	-0.10224	-0.0428936	-0.341127	-1.21165	NA
Xetrov90013654m.g	acss1		Late_Activated	Not Expressed in Gastrula Dissections	NA	NA	NA	NA	NA	-1.96995	NA
Xetrov90005547m.g	acy3		Late_Activated	AnimalCap_Avg	NA	1.36866	0.0906698	-0.321675	-1.66483	-1.50957	Chr02:89846709-89846950,Chr02:89826070-89826413,Chr02:89815071-89815792
Xetrov90009244m.g	adamts7		Late_Activated	Not Enriched in any Gastrula Dissections	-0.00459818	-0.347372	-0.504471	-0.771138	-0.939601	-1.28076	Chr03:116061331-116061734
Xetrov90022160m.g	adamtsl4		Late_Activated	Not Expressed in Gastrula Dissections	NA	NA	-0.110024	-0.302415	-0.226152	-1.68369	Chr08:106723397-106723791,Chr08:106831707-106832380,Chr08:106699553-106700013,Chr08:106701354-106701661,Chr08:106853302-106853707
Xetrov90011262m.g	adcy7		Late_Repressed	Not Enriched in any Gastrula Dissections	-0.200748	-0.145344	0.0808084	0.193595	1.22582	0.506062	NA
Xetrov90016872m.g	adhfe1		Late_Activated	VegetalMass_Avg	NA	NA	NA	NA	-5.6886	-4.56573	NA
Xetrov90010152m.g	adm		Late_Activated	VegetalMass_Avg	NA	NA	NA	NA	-2.05022	NA	NA
Xetrov90017999m.g	admp2		Late_Activated	VegetalMass_Avg	0.419563	-0.257118	0.448239	-0.0593981	-1.16271	-0.94613	Chr07:37390402-37390820,Chr07:37403083-37403722,Chr07:37395614-37396097
Xetrov90007611m.g	adrb2		Late_Repressed	VegetalMass_Avg	0.0153628	0.306214	0.393611	0.726361	1.22812	0.754684	NA
Xetrov90007618m.g	afap1l1		Early_Activated	AnimalCap_Avg	0.546235	0.327959	-1.05401	-0.679128	-1.3954	-0.84903	Chr03:31691236-31691553,Chr03:31681964-31682167,Chr03:31684129-31684368,Chr03:31667724-31667925
Xetrov90016048m.g	agr2		Late_Repressed	AnimalCap_Avg	NA	-0.285468	0.626909	1.00354	0.708664	-0.0969382	NA
Xetrov90004785m.g	aim1l		Late_Repressed	Not Enriched in any Gastrula Dissections	-0.0521812	0.179528	-0.0623136	1.14075	1.2328	0.62509	NA
Xetrov90011632m.g	ak5		Late_Activated	Not Expressed in Gastrula Dissections	NA	NA	NA	NA	NA	-6.2899	NA
Xetrov90008992m.g	aldh1a3		Late_Activated	VegetalMass_Avg	NA	NA	NA	-0.561092	0.509425	-2.95903	Chr03:105657122-105657674,Chr03:105659673-105660070
Xetrov90012718m.g	aldh1l1		Late_Activated	AnimalCap_Avg	-0.0412946	-0.84984	-0.866343	-1.01396	-0.889243	-0.904871	Chr04:122789749-122790226
Xetrov90003273m.g	aldh7a1		Late_Repressed	VegetalMass_Avg	0.0655013	0.0855952	0.228788	1.12669	0.806947	0.837004	NA
Xetrov90001519m.g	angptl4		Late_Repressed	VegetalMass_Avg	1.48984	-0.845977	0.825223	-0.58872	1.43093	1.74938	NA
Xetrov90017486m.g	ank3		Late_Activated	Not Enriched in any Gastrula Dissections	0.0654228	0.514566	-0.180811	0.110877	-1.43051	-1.96361	NA
Xetrov90016051m.g	ankmy2		Late_Repressed	VegetalMass_Avg	-0.00912987	-0.0737904	0.310782	1.10991	1.01405	0.739633	NA
Xetrov90021403m.g	ankrd9		Late_Activated	Not Enriched in any Gastrula Dissections	0.0785362	-0.72212	0.0835208	0.113717	-0.700084	-1.04477	NA
Xetrov90010813m.g	anln		Late_Activated	VegetalMass_Avg	-0.0228713	-0.208846	0.00869464	0.0886082	-0.152521	-1.07453	NA
Xetrov90008907m.g	anpep		Late_Activated	VegetalMass_Avg	0.76784	0.375019	-0.0681863	-0.807155	-1.61426	-2.0884	Chr03:98687276-98687671
Xetrov90001371m.g	antxr2		Late_Repressed	Not Expressed in Gastrula Dissections	NA	NA	NA	NA	NA	1.96061	NA
Xetrov90008604m.g	anxa2		Late_Activated	Not Enriched in any Gastrula Dissections	-0.0800167	0.0352291	-0.118627	-0.741753	-1.06905	-1.21299	Chr03:83834940-83835424
Xetrov90016887m.g	arfgef1		Late_Repressed	Not Enriched in any Gastrula Dissections	0.103065	0.209929	0.209832	0.276376	0.724001	1.09547	NA
Xetrov90001160m.g	arhgef38		Early_Activated	VegetalMass_Avg	NA	NA	-1.67575	-1.10643	-1.43209	-0.97089	Chr01:63104716-63105003,Chr01:63132752-63133288
Xetrov90016861m.g	armc1		Late_Activated	Not Enriched in any Gastrula Dissections	0.000959335	-0.0651298	-0.14597	-0.399924	-0.704427	-1.11701	NA
Xetrov90015694m.g	armc3		Late_Activated	Dorsal_MZ_Avg	NA	NA	NA	NA	-3.3979	-0.800405	Chr06:18266210-18266579,Chr06:18237246-18237849
Xetrov90004518m.g	arsd		Not_Annotated	Not Enriched in any Gastrula Dissections	-1.92558	1.31139	-1.71882	1.90938	-0.0366281	0.45136	NA
Xetrov90020455m.g	atg4a		Late_Repressed	Not Enriched in any Gastrula Dissections	-0.0315903	0.158327	0.484445	0.770107	1.13174	1.46885	NA
Xetrov90005165m.g	atp1b1		Late_Activated	Not Enriched in any Gastrula Dissections	-0.122014	0.0162969	-0.363608	-1.12561	-2.21481	-3.25796	Chr02:68506487-68506937
Xetrov90003425m.g	atp6ap1l		Late_Activated	VegetalMass_Avg	NA	NA	NA	NA	-1.32928	-1.17991	Chr01:168255979-168256225
Xetrov90029900m.g	atp8b2		Late_Activated	Not Enriched in any Gastrula Dissections	NA	NA	-0.0889186	-0.499585	-1.20364	-0.91941	NA
Xetrov90000232m.g	avp		Late_Activated	VegetalMass_Avg	NA	0.467362	-0.147094	-1.64601	-1.96106	-1.18791	Chr01:6332442-6332703,Chr01:6328176-6328623
Xetrov90021000m.g	axl		Late_Activated	Dorsal_MZ_Avg	NA	0.122935	-0.792713	-0.801321	-0.745093	-1.7312	Chr08:58007510-58007810,Chr08:57963840-57964238,Chr08:58008724-58008934,Chr08:57955746-57956226,Chr08:57980057-57980301
Xetrov90025274m.g	b4galt6		Late_Repressed	VegetalMass_Avg	0.0377328	0.0490364	0.36756	0.754029	1.08828	0.801536	NA
Xetrov90003762m.g	baat		Late_Repressed	AnimalCap_Avg	0.0658329	0.35725	0.490481	1.46923	0.0907778	-0.810598	NA
Xetrov90004109m.g	bach1	TF	Late_Repressed	VegetalMass_Avg	0.0333088	-0.0420733	0.312251	1.04682	0.623394	-0.0896947	NA
Xetrov90010832m.g	bcl10		Late_Repressed	Not Enriched in any Gastrula Dissections	-0.443431	0.374151	0.221079	1.90906	0.197966	0.909612	NA
Xetrov90002905m.g	bcr		Late_Activated	VegetalMass_Avg	-0.0328853	-0.319575	-0.0424628	-0.469242	-0.960401	-1.09026	Chr01:143944233-143944599,Chr01:143952236-143952685
Xetrov90030689m.g	bglap		Late_Repressed	Not Enriched in any Gastrula Dissections	NA	0.820099	1.7997	NA	1.35224	1.88901	NA
Xetrov90017476m.g	bicc1		Late_Repressed	VegetalMass_Avg	-0.181051	0.07932	0.825074	1.26976	1.43371	0.582679	NA
Xetrov90012978m.g	bix1.1	TF	Late_Repressed	VegetalMass_Avg	0.209929	0.0106021	0.296367	0.212898	0.735158	1.33411	NA
Xetrov90012974m.g	bix1.2	TF	Late_Repressed	VegetalMass_Avg	-0.11414	0.206404	0.469544	0.497313	0.985736	1.89913	NA
Xetrov90001376m.g	bmp3		Late_Repressed	VegetalMass_Avg	-0.333425	-0.359233	0.00682365	0.86609	1.15808	1.16323	Chr01:76904946-76905202,Chr01:76904062-76904422
Xetrov90025349m.g	bpi		Late_Repressed	Not Expressed in Gastrula Dissections	-0.488941	-1.36337	-0.698053	0.35492	1.61483	-1.48624	NA
Xetrov90011950m.g	bsnd		Late_Activated	Not Enriched in any Gastrula Dissections	0.375653	-0.338937	0.221556	-0.122275	-1.82889	-0.374207	NA
Xetrov90010134m.g	c11orf49		Early_Activated	Not Enriched in any Gastrula Dissections	-1.50866	0.389553	-0.969329	-0.37937	-0.732003	0.349514	Chr04:160489-161018,Chr04:159390-159914
Xetrov90010670m.g	faap24		Late_Repressed	Not Enriched in any Gastrula Dissections	-0.104754	0.0204375	0.0974249	0.364514	0.529141	1.21685	NA
Xetrov90010347m.g	c1qtnf4		Late_Repressed	VegetalMass_Avg	NA	0.692535	-0.817028	0.380301	2.25897	NA	NA
Xetrov90011741m.g	c8a		Late_Activated	Ventral_MZ_Avg	NA	NA	NA	NA	-3.51961	-5.6488	Chr04:76109084-76109417
Xetrov90011742m.g	c8b		Late_Activated	VegetalMass_Avg	NA	NA	NA	NA	-3.26774	-5.13104	Chr04:76147625-76147843,Chr04:76148634-76149019
Xetrov90029779m.g	c8g		Early_Activated	Not Enriched in any Gastrula Dissections	0.226274	0.532171	-1.45665	-2.94415	-2.42609	-1.80175	NA
Xetrov90009032m.g	c8orf4		Late_Repressed	Not Enriched in any Gastrula Dissections	NA	0.739587	0.94127	0.631089	1.45597	0.721549	NA
Xetrov90003636m.g	c9		Late_Activated	Dorsal_MZ_Avg	-0.554245	0.613808	0.0091548	0.183355	-1.07737	-0.0870639	NA
Xetrov90011610m.g	ca7		Late_Activated	Dorsal_MZ_Avg	NA	NA	-0.155649	-0.918121	-2.40166	-4.13764	Chr04:69379440-69379820,Chr04:69375916-69376306
Xetrov90016695m.g	cables1-like.1		Late_Activated	Not Enriched in any Gastrula Dissections	-0.226574	-0.234406	-0.975017	-1.08221	-1.41242	-0.2609	NA
Xetrov90016696m.g	cables1-like.2		Late_Activated	Not Enriched in any Gastrula Dissections	-0.240265	-0.394506	-0.764979	-0.663053	-1.13113	-0.649959	NA
Xetrov90028663m.g	cacna1c		Late_Repressed	Not Enriched in any Gastrula Dissections	0.244844	0.125117	0.0786409	0.7429	1.09565	1.15308	NA
Xetrov90012486m.g	cacng2		Late_Activated	Not Expressed in Gastrula Dissections	NA	NA	NA	NA	NA	-2.89606	NA
Xetrov90002740m.g	camk4		Late_Activated	Not Enriched in any Gastrula Dissections	-0.711555	0.822752	-0.703897	-1.11766	-0.567905	-0.228431	Chr01:135259189-135259540
Xetrov90010299m.g	cat.2		Late_Repressed	VegetalMass_Avg	-0.107436	-0.0336823	0.314782	1.72472	0.771716	-0.612976	NA
Xetrov90013458m.g	ccdc170		Late_Repressed	Not Enriched in any Gastrula Dissections	0.71222	-0.321639	-0.449365	0.303252	1.01872	0.45974	NA
Xetrov90012704m.g	ccdc174		Early_Activated	VegetalMass_Avg	-0.838318	-1.17992	-1.30577	-1.28212	-0.953766	-0.358686	NA
Xetrov90007958m.g	ccdc38		Late_Repressed	Not Enriched in any Gastrula Dissections	NA	NA	0.774635	1.38692	1.05981	0.327351	NA
Xetrov90022944m.g	ccdc64b		Late_Activated	Dorsal_MZ_Avg,VegetalMass_Avg	NA	NA	0.249117	NA	NA	-3.40538	NA
Xetrov90012788m.g	ccdc71		Late_Activated	VegetalMass_Avg	-0.161627	-0.19463	-0.220714	-0.366436	-0.315551	-1.12631	NA
Xetrov90021283m.g	ccdc85c		Late_Activated	Not Enriched in any Gastrula Dissections	0.0155952	0.367392	0.295808	0.19756	0.229138	-1.17579	Chr08:69708930-69709279,Chr08:69737260-69737616,Chr08:69736497-69736753
Xetrov90000993m.g	noct		Late_Activated	VegetalMass_Avg	-0.172526	-0.159968	-0.252428	-0.344451	-1.27143	-1.494	Chr01:51729595-51729904
Xetrov90018787m.g	cd3e		Late_Activated	Not Expressed in Gastrula Dissections	NA	NA	NA	NA	-2.53156	-1.61338	NA
Xetrov90010281m.g	cd59		Late_Activated	VegetalMass_Avg	0.0725804	0.255102	0.10463	0.392183	0.132484	-1.19344	Chr04:7010218-7010792
Xetrov90007199m.g	cd74		Early_Activated	Not Enriched in any Gastrula Dissections	-1.04737	-1.36979	-0.0334839	-0.235933	-0.464647	-0.534375	Chr03:7871126-7871413,Chr03:7879620-7879889
Xetrov90009566m.g	cd97		Early_Repressed	Not Enriched in any Gastrula Dissections	1.89286	0.375672	1.9512	1.0558	0.812459	1.05985	Chr03:124194481-124194776
Xetrov90011418m.g	cdh11		Late_Repressed	Dorsal_MZ_Avg	NA	NA	NA	0.560867	1.62535	0.159145	Chr04:59729439-59729859,Chr04:59367124-59367432,Chr04:59403367-59403965,Chr04:59369867-59370239
Xetrov90025085m.g	cdk5rap1		Late_Activated	Not Enriched in any Gastrula Dissections	0.0563288	-0.341372	-0.733597	-1.0429	-0.795813	-1.00572	Chr10:17278964-17279220
Xetrov90002121m.g	cdkn2b		Late_Activated	AnimalCap_Avg	NA	0.342589	0.3662	-1.24256	-1.08814	0.514048	Chr01:109003534-109003754
Xetrov90010662m.g	cebpa	TF	Late_Repressed	VegetalMass_Avg	-0.0271549	-0.21548	-0.462131	0.677346	1.61263	0.522346	NA
Xetrov90016780m.g	cebpd	TF	Late_Repressed	VegetalMass_Avg	-0.152202	0.27559	0.639568	1.29395	1.39913	1.07414	NA
Xetrov90001169m.g	cenpe		Early_Activated	Not Enriched in any Gastrula Dissections	-1.65595	-1.46603	-0.694882	-0.369013	-0.191577	-0.487871	Chr01:64026611-64026886
Xetrov90025760m.g	cfh		Late_Repressed	Not Enriched in any Gastrula Dissections	0.564583	-0.35936	-0.890654	0.0487132	1.01902	-0.23798	NA
Xetrov90016961m.g	chmp4c		Late_Activated	AnimalCap_Avg	-0.0138047	-0.153033	0.479723	-1.34893	-1.05807	-0.371373	NA
Xetrov90021821m.g	chp1		Late_Activated	VegetalMass_Avg	0.0522202	0.0015782	0.028448	-0.241693	-0.96437	-1.34506	Chr08:95392161-95392496
Xetrov90010660m.g	chst8		Late_Repressed	VegetalMass_Avg	-0.132514	-0.0914309	-0.0010526	1.15325	-0.188531	NA	Chr04:20177287-20177629
Xetrov90008872m.g	ckmt1b		Late_Activated	VegetalMass_Avg	0.106368	0.715347	-0.490447	-0.698109	-1.26451	-2.86106	NA
Xetrov90014733m.g	clrn1		Late_Activated	Not Expressed in Gastrula Dissections	NA	NA	NA	NA	NA	-2.98181	NA
Xetrov90016848m.g	clvs1		Late_Activated	Not Enriched in any Gastrula Dissections	0.0305275	-0.125536	-0.321722	0.546231	-1.95635	0.17303	NA
Xetrov90000285m.g	cml		Late_Activated	Ventral_MZ_Avg	NA	-0.152257	-0.539654	-1.50751	-1.0015	0.473284	NA
Xetrov90020183m.g	cnga2		Late_Repressed	Lateral_MZ_Avg	NA	NA	NA	NA	1.37614	0.339395	NA
Xetrov90013378m.g	cnrip1		Late_Activated	VegetalMass_Avg	NA	-0.818846	-0.993883	-1.04376	-2.66472	-2.17761	Chr05:30984992-30985702
Xetrov90010828m.g	col24a1		Late_Repressed	VegetalMass_Avg	0.345619	-0.406662	0.647007	-0.100142	1.46398	0.0476452	NA
Xetrov90012178m.g	col5a3		Late_Repressed	Not Expressed in Gastrula Dissections	NA	NA	NA	NA	2.52904	-0.19348	Chr04:99540455-99540711
Xetrov90017784m.g	cpn1		Late_Activated	Not Expressed in Gastrula Dissections	NA	NA	NA	NA	-2.03243	-2.44232	Chr07:27375988-27376361
Xetrov90021841m.g	crip1		Late_Repressed	Not Enriched in any Gastrula Dissections	-1.07657	-0.551913	0.353756	1.87222	-0.430343	0.431239	NA
Xetrov90002805m.g	crybb2		Late_Activated	Dorsal_MZ_Avg	NA	-0.0319427	-0.740483	-0.736771	-1.64076	-0.930939	Chr01:139324422-139324652,Chr01:139292862-139293425
Xetrov90005098m.g	ctse		Late_Activated	Not Expressed in Gastrula Dissections	NA	NA	NA	NA	NA	-2.2905	NA
Xetrov90018006m.g	cxcl12		Late_Repressed	AnimalCap_Avg	NA	0.276831	0.718947	1.61239	2.29309	2.02916	Chr07:37845699-37845960,Chr07:37849126-37849798
Xetrov90023998m.g	cyp20a1		Late_Activated	Not Enriched in any Gastrula Dissections	-0.135474	-0.500891	-0.733405	-0.897936	-1.10305	-1.10636	NA
Xetrov90014167m.g	cyp3a4		Not_Annotated	Not Enriched in any Gastrula Dissections	-1.37617	0.0842759	-0.283048	1.57068	1.55273	-0.520065	NA
Xetrov90004883m.g	cyp4f22		Late_Repressed	AnimalCap_Avg	NA	NA	NA	NA	1.60349	-0.0658825	NA
Xetrov90023446m.g	cyth3		Late_Activated	Not Enriched in any Gastrula Dissections	0.033382	0.242498	0.207516	-0.648888	-0.0582415	-3.12306	Chr09:19536244-19536448,Chr09:19516620-19516849
Xetrov90018994m.g	dbp	TF	Late_Repressed	Not Enriched in any Gastrula Dissections	0.442854	-1.02107	0.55384	0.494067	1.0031	1.0612	NA
Xetrov90027234m.g	dennd1a		Late_Repressed	Not Enriched in any Gastrula Dissections	-0.0468899	0.0194966	0.163892	0.17859	0.498295	1.65749	NA
Xetrov90006208m.g	dhh		Late_Activated	Dorsal_MZ_Avg,VegetalMass_Avg	-1.18401	0.147637	-1.02152	-1.86586	-1.7116	-2.0034	Chr02:133203044-133203354,Chr02:133206106-133206400,Chr02:133236933-133237189,Chr02:133247482-133247801,Chr02:133216408-133216747
Xetrov90024670m.g	dhx58		Late_Repressed	Not Enriched in any Gastrula Dissections	0.482124	0.9305	0.442017	2.64761	2.00029	0.984909	NA
Xetrov90011812m.g	diras3		Late_Repressed	Not Enriched in any Gastrula Dissections	NA	-0.684835	-1.56085	-0.18152	1.61243	1.6997	NA
Xetrov90017466m.g	dkk1		Early_Repressed	Dorsal_MZ_Avg,VegetalMass_Avg	1.09229	0.265086	0.207112	0.399735	0.485729	0.357659	Chr07:5560577-5561626,Chr07:5623688-5624449,Chr07:5563281-5563542,Chr07:5565844-5566464,Chr07:5571893-5572223,Chr07:5633197-5634060,Chr07:5562429-5562824
Xetrov90001145m.g	dkk2		Late_Repressed	Not Expressed in Gastrula Dissections	NA	NA	NA	NA	3.20574	1.25783	NA
Xetrov90024708m.g	dkkx		Early_Repressed	Dorsal_MZ_Avg	NA	NA	1.06508	0.885136	0.89453	-0.938454	Chr10:3567131-3567532,Chr10:3562868-3563219
Xetrov90011822m.g	dmbx1	TF	Late_Repressed	VegetalMass_Avg	0.239031	-0.0156816	0.76423	0.615409	1.01673	-0.244951	Chr04:80953554-80953871
Xetrov90025236m.g	dnai2		Late_Activated	Not Enriched in any Gastrula Dissections	0.213853	-0.41677	0.204123	-0.707876	-0.558394	-1.20537	NA
Xetrov90030778m.g	dnase1l3		Late_Repressed	Not Expressed in Gastrula Dissections	NA	NA	NA	NA	2.15399	0.787526	NA
Xetrov90009724m.g	dnm2		Late_Repressed	Not Enriched in any Gastrula Dissections	0.495939	0.578936	0.359422	0.429017	0.723765	1.08502	NA
Xetrov90009008m.g	dock5		Late_Repressed	Not Enriched in any Gastrula Dissections	-0.00449727	-0.038636	0.202583	0.802818	1.67527	1.04858	NA
Xetrov90004045m.g	dopey2		Late_Repressed	Not Enriched in any Gastrula Dissections	-0.0643422	0.0258751	0.289859	0.530942	1.11938	0.418521	NA
Xetrov90018264m.g	draxin		Late_Activated	Not Enriched in any Gastrula Dissections	-0.172809	-0.0476996	0.0823432	0.00551784	-0.135216	-1.54293	Chr07:54004402-54004800,Chr07:54004089-54004310
Xetrov90010939m.g	drd4		Late_Activated	VegetalMass_Avg	NA	0.231718	-0.992285	-1.04459	-0.76446	-0.700025	Chr04:35775214-35775848
Xetrov90020160m.g	drp2		Late_Repressed	Dorsal_MZ_Avg	NA	-0.632491	0.425509	1.77555	-0.0207711	-0.920137	NA
Xetrov90004026m.g	ripply3		Late_Repressed	Ventral_MZ_Avg	0.625001	-1.57218	1.0532	1.18557	1.78513	1.58629	NA
Xetrov90005063m.g	dstyk		Late_Activated	Not Enriched in any Gastrula Dissections	-0.0450291	-0.145171	-0.170208	-0.3718	-1.21067	-1.7744	Chr02:64181759-64182218
Xetrov90016114m.g	dtnbp1		Late_Repressed	Not Enriched in any Gastrula Dissections	0.762076	0.870085	0.75348	0.766144	0.806866	1.16987	NA
Xetrov90016150m.g	dusp22		Early_Repressed	VegetalMass_Avg	0.202144	0.827945	1.14188	1.62707	1.97376	1.93076	NA
Xetrov90019784m.g	dusp9		Late_Repressed	Not Expressed in Gastrula Dissections	NA	NA	NA	NA	1.78067	-0.466277	NA
Xetrov90005219m.g	dynlt3		Late_Activated	AnimalCap_Avg	NA	NA	NA	-1.14544	-0.373709	-1.79508	NA
Xetrov90025429m.g	e2f1	TF	Late_Repressed	VegetalMass_Avg	-0.126779	-0.16942	-0.0282569	1.646	0.91152	0.112824	NA
Xetrov90011016m.g	efemp2		Late_Repressed	Not Enriched in any Gastrula Dissections	NA	NA	0.651902	0.757986	1.44527	0.787239	Chr04:37826702-37827124
Xetrov90002751m.g	efna5		Late_Repressed	VegetalMass_Avg	-0.129972	-0.129939	0.0119663	1.04015	0.890624	0.820139	Chr01:136520109-136520426
Xetrov90003656m.g	egflam		Late_Activated	Dorsal_MZ_Avg,VegetalMass_Avg	NA	NA	0.113262	-1.38827	-1.27677	-1.02609	Chr01:184671853-184672436
Xetrov90016289m.g	egfr		Late_Repressed	Not Enriched in any Gastrula Dissections	-1.01716	-1.14476	NA	2.01385	1.38084	0.0121858	Chr06:65409300-65409706,Chr06:65444378-65444923,Chr06:65418475-65418724,Chr06:65410268-65410588
Xetrov90011885m.g	elavl4		Late_Repressed	Not Enriched in any Gastrula Dissections	0.626618	-0.0729241	0.182711	-0.437113	1.34102	-0.248134	NA
Xetrov90005072m.g	elf3	TF	Late_Repressed	Not Expressed in Gastrula Dissections	NA	NA	NA	NA	NA	3.51127	NA
Xetrov90012255m.g	emp1		Late_Repressed	Lateral_MZ_Avg	0.126312	0.587812	NA	NA	2.57701	NA	NA
Xetrov90013590m.g	enpp3		Late_Activated	Not Expressed in Gastrula Dissections	NA	NA	-0.512964	NA	NA	-3.8385	NA
Xetrov90015267m.g	enpp4		Late_Repressed	Not Enriched in any Gastrula Dissections	0.0328742	0.225973	0.455983	0.992715	1.19898	1.22031	NA
Xetrov90023203m.g	epn2		Late_Activated	Dorsal_MZ_Avg	0.520585	0.328546	0.272179	-1.12338	-1.43062	-1.21566	Chr09:12606138-12606343
Xetrov90005986m.g	ercc5		Late_Repressed	Not Enriched in any Gastrula Dissections	0.190028	0.312298	0.481059	0.871541	1.25328	1.43907	NA
Xetrov90018415m.g	esam		Late_Activated	Lateral_MZ_Avg	NA	NA	-0.417236	-2.24226	-2.49766	-3.05009	Chr07:64470696-64471237
Xetrov90011108m.g	esrra	TF	Late_Activated	Not Enriched in any Gastrula Dissections	-0.236926	-0.525658	-0.305343	-1.1415	0.280815	0.537159	NA
Xetrov90020962m.g	esrrgr	TF	Late_Repressed	Not Enriched in any Gastrula Dissections	-0.141175	-0.499167	-0.170279	1.24971	1.8972	2.93617	NA
Xetrov90027763m.g	etv2	TF	Early_Repressed	Dorsal_MZ_Avg,VegetalMass_Avg	NA	NA	2.58408	1.48383	2.21279	1.39005	NA
Xetrov90024940m.g	ezh1		Late_Repressed	Not Enriched in any Gastrula Dissections	0.121525	-0.028435	0.163509	1.01668	1.00234	1.76943	NA
Xetrov90013964m.g	ezr		Late_Activated	AnimalCap_Avg	NA	NA	-0.701382	-0.130585	-1.04316	-0.88653	NA
Xetrov90022361m.g	f13b-like		Late_Activated	Not Expressed in Gastrula Dissections	NA	NA	NA	NA	NA	-5.61662	NA
Xetrov90003357m.g	f2rl2		Late_Repressed	Not Enriched in any Gastrula Dissections	NA	NA	NA	NA	1.6452	0.950159	NA
Xetrov90016830m.g	fam110b-like		Late_Repressed	VegetalMass_Avg	0.145571	0.0211775	-0.267247	1.07803	-0.238156	-0.346524	NA
Xetrov90003369m.g	fam169a		Late_Activated	Not Enriched in any Gastrula Dissections	NA	NA	-0.682065	-0.150946	-0.680101	-1.20844	Chr01:165743650-165743880
Xetrov90008697m.g	fam189a1		Late_Repressed	Not Enriched in any Gastrula Dissections	-0.13644	0.0475098	-0.00146477	0.158283	0.441421	1.05083	NA
Xetrov90005240m.g	fam212b		Late_Repressed	VegetalMass_Avg	0.0267134	0.134587	-0.0219024	1.24292	0.181059	0.127518	NA
Xetrov90015221m.g	fam228b		Late_Activated	Not Enriched in any Gastrula Dissections	-0.442318	-0.732888	-0.0778783	-0.179395	-1.64948	-1.03081	Chr05:141617922-141618275,Chr05:141620771-141621098
Xetrov90013993m.g	fam26d		Late_Activated	AnimalCap_Avg	NA	NA	-1.23078	-0.636433	-1.53268	-2.25902	NA
Xetrov90014139m.g	fam46a		Late_Repressed	AnimalCap_Avg	0.187637	-0.470097	0.248559	-0.00713214	0.251665	1.36575	NA
Xetrov90004800m.g	fam46b		Late_Repressed	VegetalMass_Avg	-0.0398201	0.219697	0.91241	1.37412	1.36223	1.10662	NA
Xetrov90000234m.g	fastkd5		Late_Activated	Not Enriched in any Gastrula Dissections	-0.150092	-0.0887227	-0.721288	-1.00212	-0.742013	-0.609371	NA
Xetrov90001296m.g	fbn3		Late_Repressed	Not Expressed in Gastrula Dissections	0.362758	-0.375791	-1.26022	1.04714	2.56377	0.551898	NA
Xetrov90017027m.g	fbxo43		Late_Repressed	VegetalMass_Avg	-0.106267	-0.0679247	0.428858	1.06293	0.137814	-0.704178	NA
Xetrov90003606m.g	fgf10		Late_Activated	Not Expressed in Gastrula Dissections	NA	NA	NA	NA	-4.67713	-3.08183	Chr01:181602726-181603020,Chr01:181589523-181589999
Xetrov90026572m.g	fgfr1op2		Late_Repressed	Not Enriched in any Gastrula Dissections	0.453261	0.61827	0.524472	0.849313	1.41125	2.14243	NA
Xetrov90023137m.g	flii		Late_Repressed	Not Enriched in any Gastrula Dissections	0.035027	0.22703	0.453076	0.885535	1.11174	0.873207	NA
Xetrov90024406m.g	fmnl2		Late_Repressed	Not Enriched in any Gastrula Dissections	-0.401961	-0.359209	-0.738956	-0.0184912	1.26914	0.199446	NA
Xetrov90025750m.g	fn3k		Late_Activated	VegetalMass_Avg	-0.749663	NA	0.531161	-0.248814	-1.35658	-1.80197	NA
Xetrov90012929m.g	fosl2	TF	Late_Repressed	VegetalMass_Avg	-0.0863765	-0.0728732	0.089321	0.645239	0.584371	1.45571	NA
Xetrov90021679m.g	foxa1	TF	Early_Activated	VegetalMass_Avg	0.580357	-0.152096	-2.47927	-4.77576	-4.37492	-2.84337	Chr08:88815191-88815407,Chr08:88814306-88814746,Chr08:88824206-88824426
Xetrov90011569m.g	foxf1	TF	Late_Repressed	Ventral_MZ_Avg	NA	NA	NA	1.00558	1.21749	0.686917	NA
Xetrov90026655m.g	foxh1	TF	Late_Repressed	VegetalMass_Avg	-0.0376246	0.232785	0.654192	1.14621	0.725998	0.194803	scaffold_162:21746-22039
Xetrov90017599m.g	foxi2	TF	Late_Repressed	Not Enriched in any Gastrula Dissections	-0.00737593	0.0811509	0.00914587	0.420588	0.488668	1.32382	Chr07:15768816-15769229
Xetrov90016154m.g	foxq1	TF	Late_Activated	VegetalMass_Avg	NA	-0.4646	NA	NA	1.11621	-2.01045	Chr06:51611142-51611404
Xetrov90023698m.g	frs2		Late_Repressed	VegetalMass_Avg	0.100822	-0.0111439	0.148398	1.0599	0.676021	0.593163	NA
Xetrov90003596m.g	fst		Late_Repressed	Dorsal_MZ_Avg	0.69478	0.260816	0.754861	1.0227	1.02565	0.0870955	Chr01:179560258-179560707
Xetrov90028354m.g	fstl1		Late_Repressed	Dorsal_MZ_Avg	-0.0694784	0.161203	-0.553872	0.325601	1.05203	0.451383	NA
Xetrov90023854m.g	fzd5		Late_Activated	VegetalMass_Avg	-0.0195725	0.0586598	-0.509171	-0.61104	-1.08364	-2.12965	Chr09:41404139-41404791
Xetrov90006949m.g	gab2		Late_Repressed	VegetalMass_Avg	-0.0783948	-0.041427	0.0854128	0.2675	1.20512	1.8372	NA
Xetrov90001437m.g	gadd45b		Early_Repressed	AnimalCap_Avg	0.202842	-0.268921	1.19297	-0.103562	-0.253532	1.21898	NA
Xetrov90016566m.g	gcnt2		Late_Activated	VegetalMass_Avg	NA	NA	NA	0.169724	NA	-1.98036	Chr06:84499276-84499753
Xetrov90008684m.g	gcnt3		Late_Activated	AnimalCap_Avg	NA	NA	-0.271937	-0.479773	-1.18576	-0.743177	NA
Xetrov90001964m.g	gdf3		Late_Repressed	VegetalMass_Avg	0.265192	-0.0973878	0.407782	0.558304	0.519119	1.08334	Chr01:100373054-100373427
Xetrov90017059m.g	gdf6		Late_Repressed	Ventral_MZ_Avg	NA	NA	NA	NA	1.41584	-0.384363	Chr06:115147566-115147844,Chr06:115144225-115144534
Xetrov90003655m.g	gdnf		Late_Activated	Dorsal_MZ_Avg,VegetalMass_Avg	NA	NA	NA	NA	-2.00507	-1.22603	Chr01:184501797-184502149,Chr01:184571443-184571718,Chr01:184498996-184499189
Xetrov90017020m.g	gem		Late_Repressed	Not Enriched in any Gastrula Dissections	0.196013	-0.572581	-0.00667839	2.11264	NA	NA	NA
Xetrov90012071m.g	gfi1	TF	Late_Repressed	Not Expressed in Gastrula Dissections	NA	NA	NA	NA	2.51009	2.38285	NA
Xetrov90002915m.g	ggt1		Late_Activated	VegetalMass_Avg	-0.457141	-0.0266718	0.0187615	-0.684215	-1.47708	-2.7317	Chr01:144150708-144150996,Chr01:144155373-144155905,Chr01:144161521-144161803
Xetrov90020307m.g	gjb1		Late_Activated	VegetalMass_Avg	0.172827	-0.883921	-0.381462	-4.66336	-5.09814	-4.79642	Chr08:23162183-23162446,Chr08:23160845-23161143,Chr08:23174923-23175313
Xetrov90006787m.g	gjb2		Late_Activated	Dorsal_MZ_Avg	-0.197782	0.668172	-0.199124	-1.33648	-1.22301	-1.90163	Chr02:155793314-155793556,Chr02:155810914-155811653
Xetrov90024535m.g	glb1		Late_Activated	Not Enriched in any Gastrula Dissections	0.575428	0.102182	0.874461	-1.33166	-0.713907	0.120646	NA
Xetrov90008783m.g	gldn		Late_Activated	VegetalMass_Avg	-0.161994	0.0907776	-0.270579	-0.467807	-1.0116	-2.10173	NA
Xetrov90006323m.g	gli1	TF	Early_Repressed	Dorsal_MZ_Avg	-0.357772	NA	1.17604	0.459114	0.4049	0.0612457	Chr02:137111992-137112434,Chr02:137128606-137129019,Chr02:137116249-137116580,Chr02:137109357-137110048
Xetrov90000778m.g	glra3		Late_Activated	VegetalMass_Avg	NA	NA	NA	NA	-2.58902	-1.97069	Chr01:38957419-38957675
Xetrov90001854m.g	gng10		Late_Activated	VegetalMass_Avg	-0.480572	-0.446087	-0.699024	-0.999398	-1.20027	-1.0829	NA
Xetrov90015794m.g	gngt1		Late_Repressed	VegetalMass_Avg	NA	NA	NA	1.50223	1.97522	2.82752	NA
Xetrov90004819m.g	gngt2.1		Early_Repressed	Not Enriched in any Gastrula Dissections	1.96318	NA	1.45082	2.08311	2.37974	1.60608	NA
Xetrov90009300m.g	gnrhr2/nmi		Late_Activated	Not Expressed in Gastrula Dissections	NA	NA	NA	-0.645688	-2.98558	-6.84144	NA
Xetrov90017760m.g	golga7b		Late_Activated	Not Enriched in any Gastrula Dissections	-1.13599	-0.205299	-0.0756627	-0.0695185	-1.23271	-1.26529	NA
Xetrov90014930m.g	gpc1		Late_Activated	Not Enriched in any Gastrula Dissections	NA	-0.320277	0.302781	-0.243166	-1.66854	-1.11215	NA
Xetrov90010650m.g	gpi		Late_Activated	Not Enriched in any Gastrula Dissections	0.00414801	-0.106614	-0.459229	-0.805634	-1.20295	-1.25394	NA
Xetrov90005192m.g	gpr82		Late_Activated	VegetalMass_Avg	NA	NA	-0.265875	0.00757068	-1.18491	-2.10162	NA
Xetrov90003938m.g	gpr89b		Late_Repressed	Not Enriched in any Gastrula Dissections	0.200888	0.0851857	0.0849988	0.430312	0.687492	1.1339	NA
Xetrov90017344m.g	gpt2		Late_Repressed	Not Enriched in any Gastrula Dissections	0.0102234	0.144363	0.250675	0.445043	0.676607	1.17238	NA
Xetrov90017117m.g	grhl2	TF	Late_Activated	Not Enriched in any Gastrula Dissections	-0.2475	0.344711	-0.302716	-0.832429	-1.7251	-2.11011	Chr06:119057666-119058231,Chr06:119046254-119046745,Chr06:119011313-119011732
Xetrov90002060m.g	grin3a		Late_Activated	Not Expressed in Gastrula Dissections	NA	NA	-0.0935674	0.804506	-1.79086	-0.383035	Chr01:104629689-104629995
Xetrov90007706m.g	grk6		Late_Activated	Not Enriched in any Gastrula Dissections	-0.365481	-0.783044	-0.939705	-1.06443	-0.929129	-0.579281	NA
Xetrov90015002m.g	grk7		Late_Activated	VegetalMass_Avg	NA	NA	-0.0791037	0.761421	-0.75804	-1.58022	Chr05:125947033-125947902,Chr05:125954044-125954410
Xetrov90012667m.g	grm7		Late_Repressed	Not Enriched in any Gastrula Dissections	0.348353	0.373618	0.444181	0.851009	1.40715	1.48785	NA
Xetrov90025471m.g	gss		Early_Repressed	Dorsal_MZ_Avg	-0.0614718	0.853327	1.75962	-0.31638	-0.0436419	-0.17642	NA
Xetrov90028066m.g	gsto2		Late_Repressed	AnimalCap_Avg	-1.16925	-0.677823	0.216679	0.598452	1.27051	-0.628512	NA
Xetrov90024451m.g	gtdc1		Late_Repressed	Not Enriched in any Gastrula Dissections	-0.00693724	0.352294	0.401835	0.660636	1.40992	1.65355	Chr09:73576954-73577384,Chr09:73712247-73712615,Chr09:73486649-73486989
Xetrov90010280m.g	guca1b		Late_Activated	Ventral_MZ_Avg	NA	NA	NA	NA	NA	-2.61794	NA
Xetrov90007221m.g	hand1	TF	Late_Repressed	Not Expressed in Gastrula Dissections	NA	NA	NA	NA	2.98636	0.95652	NA
Xetrov90000782m.g	hand2	TF	Late_Repressed	Not Enriched in any Gastrula Dissections	0.0427176	-0.317516	-0.207209	0.163977	1.00917	1.89201	NA
Xetrov90013242m.g	hao1		Late_Activated	VegetalMass_Avg	NA	NA	NA	-4.76058	-5.64322	-5.6192	Chr05:21640695-21641093,Chr05:21507749-21508222,Chr05:21497995-21498209,Chr05:21511496-21511839,Chr05:21638543-21638996
Xetrov90021609m.g	haus2		Late_Activated	Not Enriched in any Gastrula Dissections	-0.161884	-0.199227	-0.074704	-0.125603	-0.718197	-1.42686	NA
Xetrov90023771m.g	hbg1		Late_Activated	Not Enriched in any Gastrula Dissections	NA	NA	NA	-2.72385	-2.71502	-1.66824	NA
Xetrov90018725m.g	hes5.2	TF	Late_Repressed	Not Expressed in Gastrula Dissections	NA	NA	NA	NA	1.79434	0.30863	NA
Xetrov90009907m.g	hes7.1	TF	Late_Activated	Dorsal_MZ_Avg	0.119019	-0.0281225	0.461201	0.128105	-1.01941	-0.198883	NA
Xetrov90000946m.g	hhip		Early_Activated	Not Enriched in any Gastrula Dissections	-1.03111	-1.62485	-0.280311	-0.759902	-0.800115	0.0986865	Chr01:49503967-49504200,Chr01:49498918-49499234
Xetrov90022566m.g	hist1h3g		Late_Repressed	Dorsal_MZ_Avg	0.899635	0.0771161	-2.25765	9.08131	2.46618	NA	NA
Xetrov90020795m.g	hla-drb1		Late_Repressed	VegetalMass_Avg	NA	NA	NA	0.284911	1.28395	-0.577212	NA
Xetrov90013039m.g	hlx	TF	Late_Repressed	Not Expressed in Gastrula Dissections	NA	NA	NA	NA	1.94949	1.16033	NA
Xetrov90019855m.g	hmcn2		Late_Repressed	Not Enriched in any Gastrula Dissections	-0.031105	-0.103146	-0.382905	0.426099	1.12259	0.369358	Chr08:5469118-5469758
Xetrov90012283m.g	hmox1		Early_Activated	AnimalCap_Avg,Dorsal_MZ_Avg	-2.07989	NA	0.355395	0.546911	0.918622	0.229039	NA
Xetrov90029299m.g	hmx1	TF	Late_Repressed	Ventral_MZ_Avg	NA	NA	NA	NA	3.23557	NA	NA
Xetrov90004709m.g	hnf1b	TF	Early_Activated	VegetalMass_Avg	NA	-0.538966	-1.50039	-1.91888	-2.07141	-1.38935	Chr02:48894125-48894576,Chr02:48860951-48861305,Chr02:48900424-48901121,Chr02:48906964-48907327,Chr02:48890353-48890830
Xetrov90014411m.g	hrg		Late_Activated	AnimalCap_Avg	NA	NA	NA	NA	-0.0270173	-1.48587	NA
Xetrov90022630m.g	hsd3b7		Late_Activated	Not Expressed in Gastrula Dissections	NA	NA	NA	NA	0.612015	-1.3332	Chr09:1700195-1700676
Xetrov90014640m.g	htr2b		Late_Repressed	Not Enriched in any Gastrula Dissections	NA	NA	0.527389	2.59401	1.59259	0.186081	NA
Xetrov90010467m.g	igf2		Late_Activated	VegetalMass_Avg	NA	NA	NA	NA	-2.83531	-2.55273	Chr04:12744216-12744454,Chr04:12732173-12733020,Chr04:12752032-12752461,Chr04:12734250-12734856
Xetrov90019209m.g	igf3		Late_Activated	Not Enriched in any Gastrula Dissections	NA	-0.455873	0.364565	-0.256552	-0.540084	-1.11075	Chr07:103116548-103116717,Chr07:103107750-103107947,Chr07:103120663-103121287
Xetrov90030703m.g	igsf3		Late_Activated	VegetalMass_Avg	NA	NA	NA	-2.72841	-2.80303	-1.92226	scaffold_85:160826-161294
Xetrov90007621m.g	il17b		Late_Repressed	Dorsal_MZ_Avg	NA	NA	NA	NA	6.3643	3.83	NA
Xetrov90005829m.g	il1r2		Late_Repressed	Not Enriched in any Gastrula Dissections	-0.235933	-0.481263	0.150723	0.166596	1.30996	-0.206075	NA
Xetrov90017675m.g	ina		Late_Activated	Not Enriched in any Gastrula Dissections	NA	NA	-0.0626734	NA	-0.535899	-1.95631	Chr07:20448040-20448277
Xetrov90021444m.g	inf2		Late_Activated	VegetalMass_Avg	0.0157779	-0.00784746	-0.0877934	0.038185	-0.449308	-1.3986	Chr08:78707811-78708259
Xetrov90009406m.g	inpp5a.2		Late_Activated	AnimalCap_Avg	0.793563	0.309109	-0.761214	-0.18881	-0.910117	-1.10523	NA
Xetrov90004725m.g	ipo9		Early_Activated	Not Enriched in any Gastrula Dissections	-0.189428	-0.747039	-1.42063	-1.79304	-2.09512	-1.92012	NA
Xetrov90020359m.g	irg1		Late_Repressed	AnimalCap_Avg	0.548628	0.386327	0.327378	1.17587	-0.407648	4.71806	NA
Xetrov90020351m.g	irg1.2		Early_Repressed	AnimalCap_Avg	-1.6142	1.63191	2.56683	1.36016	-0.591241	5.87775	NA
Xetrov90025557m.g	itgb4		Late_Activated	Not Enriched in any Gastrula Dissections	NA	NA	0.763261	0.642647	-0.0142952	-1.35963	NA
Xetrov90016922m.g	jph1		Late_Repressed	VegetalMass_Avg	0.217494	0.278348	0.488886	1.1158	1.01219	0.750482	NA
Xetrov90026831m.g	junb	TF	Late_Repressed	Not Enriched in any Gastrula Dissections	0.958653	-0.911267	0.822619	-0.0264294	0.451418	1.84193	scaffold_185:138802-139250
Xetrov90004319m.g	anos1		Late_Activated	Not Expressed in Gastrula Dissections	NA	NA	NA	NA	NA	-1.97217	Chr02:28763978-28764328,Chr02:28690732-28691207
Xetrov90004064m.g	kcne1		Late_Activated	Dorsal_MZ_Avg,VegetalMass_Avg	NA	-0.23125	-0.482885	NA	-2.82877	NA	Chr02:10349619-10350145
Xetrov90013129m.g	kcng3-like.1		Late_Repressed	VegetalMass_Avg	0.0806739	NA	0.328054	1.61452	0.718425	-0.694714	NA
Xetrov90018440m.g	kcnj1		Late_Activated	VegetalMass_Avg	NA	NA	0.355644	NA	-0.41469	-2.34367	NA
Xetrov90025176m.g	kcnj16		Late_Activated	Not Expressed in Gastrula Dissections	NA	NA	NA	NA	NA	-8.4308	NA
Xetrov90008453m.g	kcp		Late_Repressed	Not Expressed in Gastrula Dissections	NA	-0.196742	-0.521152	2.01346	2.85216	0.297965	NA
Xetrov90006071m.g	kctd12		Late_Repressed	Dorsal_MZ_Avg	NA	NA	0.153567	0.2502	1.61248	0.570167	NA
Xetrov90000672m.g	kdr		Late_Repressed	AnimalCap_Avg	NA	NA	0.630115	1.20041	0.943558	1.75339	Chr01:31072436-31072992
Xetrov90025357m.g	kiaa1755		Late_Repressed	Not Enriched in any Gastrula Dissections	0.21801	-1.00999	0.338388	0.564586	1.11588	0.135434	Chr10:30879923-30880194,Chr10:30876912-30877270
Xetrov90028377m.g	kirrel2		Early_Repressed	Not Enriched in any Gastrula Dissections	1.35017	0.0358498	0.126985	0.0107958	0.288988	0.590619	scaffold_37:834091-834597,scaffold_37:844304-844702,scaffold_37:843236-843647
Xetrov90008952m.g	klhl25		Late_Activated	Not Enriched in any Gastrula Dissections	-0.136763	0.0166821	0.0264693	-0.316162	-0.898131	-1.22278	Chr03:101577874-101578256
Xetrov90001703m.g	klhl26		Late_Activated	Not Enriched in any Gastrula Dissections	-0.0606189	-0.197254	-0.788308	-0.688229	-1.06723	-0.746344	NA
Xetrov90014412m.g	kng1		Late_Repressed	Dorsal_MZ_Avg	-0.736674	-0.139276	-0.103625	0.841724	1.14137	-0.45508	Chr05:98077541-98077796
Xetrov90024647m.g	krt		Early_Repressed	AnimalCap_Avg	0.512736	1.00608	0.623862	0.148988	-0.428513	-0.307216	NA
Xetrov90024642m.g	krt19		Late_Activated	VegetalMass_Avg	NA	NA	NA	-2.66355	-3.76915	-2.43659	Chr10:1731505-1731780,Chr10:1750167-1750784,Chr10:1751965-1752305
Xetrov90001697m.g	kxd1		Late_Repressed	VegetalMass_Avg	-0.0877762	-0.195349	0.26422	1.14609	0.567014	-0.240588	NA
Xetrov90006135m.g	lacc1		Late_Activated	Ventral_MZ_Avg,Lateral_MZ_Avg	0.175519	0.726365	-0.659871	-0.126246	-0.404295	-2.12136	NA
Xetrov90014044m.g	lama4		Late_Repressed	VegetalMass_Avg	NA	NA	0.329579	0.576843	1.0429	0.71627	NA
Xetrov90008254m.g	lamb1		Early_Repressed	Dorsal_MZ_Avg	0.186448	1.08442	1.47865	0.682013	0.865452	0.200472	Chr03:66432119-66432463,Chr03:66449806-66450106
Xetrov90010190m.g	ldlrad3		Late_Activated	AnimalCap_Avg,Ventral_MZ_Avg	NA	NA	NA	NA	-4.4629	NA	NA
Xetrov90012467m.g	lgals2		Late_Activated	Not Expressed in Gastrula Dissections	NA	NA	NA	NA	NA	-4.85333	Chr04:112459807-112460189
Xetrov90009778m.g	lgals9		Late_Activated	VegetalMass_Avg	0.774805	0.585469	0.13762	-0.0300843	0.119584	-1.57763	Chr03:128986371-128986738
Xetrov90005727m.g	lgals9c		Late_Activated	Dorsal_MZ_Avg	NA	NA	-0.199979	-1.38589	-0.696761	-0.433876	NA
Xetrov90017794m.g	lgi1		Late_Repressed	Not Enriched in any Gastrula Dissections	-0.624796	0.438997	0.316287	NA	5.81809	NA	NA
Xetrov90002706m.g	lhx5	TF	Early_Repressed	AnimalCap_Avg	1.22997	0.24423	-0.0883062	-0.118707	-0.367674	-0.135605	Chr01:133722955-133723304,Chr01:133721934-133722226,Chr01:133702088-133702515
Xetrov90010290m.g	lmo2		Late_Repressed	Not Enriched in any Gastrula Dissections	-0.190336	0.449352	0.277361	0.853044	1.18084	0.961564	Chr04:7272431-7272704
Xetrov90019971m.g	lmx1b.1	TF	Late_Repressed	Not Expressed in Gastrula Dissections	NA	NA	NA	NA	2.1721	0.637057	Chr08:9171634-9171866,Chr08:9173055-9173268,Chr08:9170120-9170636,Chr08:9283132-9283410,Chr08:9237481-9238029
Xetrov90019390m.g	dusp8		Late_Activated	VegetalMass_Avg	0.125181	-0.0325924	0.00102126	-1.03799	-2.54408	-2.58257	Chr07:109612565-109612819
Xetrov90010998m.g	LOC100124841		Late_Activated	Not Enriched in any Gastrula Dissections	0.0761801	-0.00143906	0.402413	-0.484976	-0.306231	-1.31143	NA
Xetrov90000668m.g	pdgfra		Late_Repressed	VegetalMass_Avg	0.0621984	0.703863	0.639555	0.407018	0.961829	1.02364	Chr01:30842301-30843079
Xetrov90015308m.g	cyp2b6		Late_Activated	AnimalCap_Avg	NA	NA	0.554567	-0.744466	-1.24618	-1.11795	NA
Xetrov90021634m.g	dpf3		Late_Activated	VegetalMass_Avg	0.620852	-0.209291	-0.295834	-1.13592	-1.07619	NA	NA
Xetrov90027848m.g	LOC100145065		Late_Activated	Not Enriched in any Gastrula Dissections	-0.0507993	-0.24581	-0.650889	-1.19388	-1.58539	-0.836563	scaffold_29:113596-113801
Xetrov90014853m.g	LOC100145345		Late_Activated	Not Enriched in any Gastrula Dissections	0.0925151	0.0947263	-0.999453	0.054004	-1.05856	-1.47154	NA
Xetrov90022591m.g	hist1h1b; LOC101730473		Early_Repressed	Dorsal_MZ_Avg	0.505516	2.3794	1.23369	0.595178	-0.166774	0.35145	Chr09:1019085-1019388
Xetrov90017308m.g	LOC100145533		Late_Repressed	AnimalCap_Avg,Ventral_MZ_Avg	NA	NA	NA	NA	1.24285	0.945198	NA
Xetrov90017305m.g	LOC100170429		Late_Repressed	VegetalMass_Avg	NA	NA	NA	NA	NA	1.38536	NA
Xetrov90001246m.g	LOC100271753		Early_Repressed	AnimalCap_Avg,Dorsal_MZ_Avg	NA	NA	1.52237	1.04463	0.660023	0.589424	NA
Xetrov90027041m.g	LOC101731593		Late_Activated	Dorsal_MZ_Avg,VegetalMass_Avg	NA	-0.0414664	-0.118684	-0.242573	0.81547	-1.25159	NA
Xetrov90005637m.g	LOC100485014		Late_Activated	Not Enriched in any Gastrula Dissections	NA	NA	NA	0.127751	-1.47611	-3.59714	Chr02:94322351-94322848
Xetrov90022538m.g	LOC100485239		Late_Activated	Lateral_MZ_Avg,Dorsal_MZ_Avg	-1.2809	1.27387	-0.590007	-2.48223	NA	-2.04754	NA
Xetrov90020499m.g	mtnr1c		Late_Activated	VegetalMass_Avg	NA	NA	NA	NA	NA	-3.305	Chr08:37034004-37034339,Chr08:37035118-37035318
Xetrov90004102m.g	cldn8; lLOC100485589		Late_Repressed	AnimalCap_Avg,Dorsal_MZ_Avg	NA	NA	NA	0.534781	1.39283	0.00449373	NA
Xetrov90021017m.g	LOC100485697	TF	Late_Activated	VegetalMass_Avg	NA	NA	NA	-4.22924	-2.4047	-2.03716	Chr08:58493923-58494141
Xetrov90003748m.g	LOC100485773		Late_Repressed	Not Enriched in any Gastrula Dissections	0.906068	0.557967	-0.142802	1.41247	0.807861	0.00469893	NA
Xetrov90017338m.g	adgre2		Late_Activated	AnimalCap_Avg	-0.505099	-0.109571	-0.831754	-1.0299	-0.953056	-0.425002	Chr06:134792712-134792944
Xetrov90026196m.g	LOC100485866		Late_Repressed	Not Enriched in any Gastrula Dissections	0.211256	0.873834	0.990002	0.43213	1.49577	2.55519	NA
Xetrov90012944m.g	LOC100486013		Early_Repressed	VegetalMass_Avg	NA	NA	1.77403	1.66652	1.23268	0.793102	Chr05:2807430-2807684
Xetrov90008247m.g	spam1		Late_Activated	VegetalMass_Avg	NA	NA	0.628796	-0.334643	-0.653488	-1.21962	NA
Xetrov90014292m.g	LOC100486129		Late_Repressed	Not Enriched in any Gastrula Dissections	0.566657	0.477126	0.647173	1.11265	0.506461	0.616982	NA
Xetrov90000249m.g	ddrgk1		Late_Activated	Not Enriched in any Gastrula Dissections	0.414409	-0.0698197	-0.182611	-0.20957	-1.08902	-0.0904364	NA
Xetrov90005423m.g	gjb4		Late_Activated	Not Expressed in Gastrula Dissections	NA	NA	NA	NA	NA	-5.55597	Chr02:84984702-84984857,Chr02:84992416-84992608,Chr02:84977845-84978117
Xetrov90017563m.g	LOC100486640		Late_Activated	Not Enriched in any Gastrula Dissections	NA	NA	NA	NA	-1.16924	-0.869666	NA
Xetrov90012744m.g	LOC100486832		Late_Repressed	VegetalMass_Avg	-0.0386157	0.234719	NA	-0.183703	3.1745	0.519959	Chr04:125055126-125055399
Xetrov90023309m.g	asb8		Late_Repressed	Not Enriched in any Gastrula Dissections	-0.0193119	0.023806	-0.0710095	0.362255	0.770398	1.331	NA
Xetrov90029848m.g	LOC100487022		Late_Repressed	AnimalCap_Avg	NA	0.497963	0.093794	2.44812	1.97081	2.73632	NA
Xetrov90029308m.g	clcnkb		Late_Activated	Dorsal_MZ_Avg	NA	NA	NA	-0.400725	-2.25582	-3.92519	scaffold_523:2848-3169
Xetrov90030764m.g	LOC100487431		Late_Activated	VegetalMass_Avg	NA	NA	-0.542574	NA	0.341582	-5.32379	NA
Xetrov90029346m.g	LOC100487632		Late_Repressed	Not Expressed in Gastrula Dissections	-0.190728	NA	NA	NA	7.07519	NA	NA
Xetrov90019929m.g	cercam		Late_Activated	Not Enriched in any Gastrula Dissections	-0.0597747	-0.121261	-0.403145	-0.574302	-1.1654	-0.576615	NA
Xetrov90022512m.g	LOC100488074		Early_Activated	Not Enriched in any Gastrula Dissections	-1.76255	0.311458	-0.0307646	-0.384678	0.190936	-0.0636611	NA
Xetrov90030794m.g	fbln1		Late_Activated	Dorsal_MZ_Avg	NA	NA	NA	NA	-1.40083	-1.47078	NA
Xetrov90026087m.g	LOC100488711		Late_Activated	Not Enriched in any Gastrula Dissections	-0.169419	0.250129	-0.572949	-0.446793	-0.36542	-2.15322	scaffold_127:188115-188646
Xetrov90021257m.g	LOC100488834		Late_Repressed	AnimalCap_Avg	NA	NA	NA	NA	2.65281	0.954068	NA
Xetrov90009492m.g	nodal3.1b; LOC100488934		Late_Repressed	Dorsal_MZ_Avg,VegetalMass_Avg	0.540157	0.585307	0.872027	1.10614	2.02022	2.05691	NA
Xetrov90014776m.g	plscr2		Early_Repressed	Not Enriched in any Gastrula Dissections	0.66944	-0.247799	1.10008	0.381832	-0.052323	-0.124615	NA
Xetrov90026267m.g	LOC100489373		Late_Activated	AnimalCap_Avg	0.776601	-0.60644	0.214584	-0.150992	-1.533	0.518735	NA
Xetrov90026846m.g	LOC100489529		Early_Activated	Not Enriched in any Gastrula Dissections	-2.05349	-1.09978	0.730818	0.287669	-0.522256	NA	NA
Xetrov90021658m.g	slc10a1		Late_Activated	AnimalCap_Avg	NA	NA	NA	NA	NA	-3.25447	Chr08:87586118-87586428
Xetrov90021820m.g	LOC100489639		Late_Activated	VegetalMass_Avg	NA	NA	NA	NA	-3.33782	NA	Chr08:95389963-95390389
Xetrov90025450m.g	LOC100489773		Late_Repressed	VegetalMass_Avg	0.374674	0.300922	0.567754	1.54191	0.603447	0.708669	Chr10:34136011-34136204
Xetrov90016873m.g	c8orf46		Late_Activated	AnimalCap_Avg	NA	-0.222938	-0.547939	-1.60989	-0.655702	-0.639978	Chr06:104073897-104074385,Chr06:104075192-104075450
Xetrov90007518m.g	LOC100490096		Late_Activated	Not Enriched in any Gastrula Dissections	-0.145603	0.0422099	-0.165546	-0.171502	-0.956052	-1.1484	NA
Xetrov90026559m.g	LOC100490216		Late_Activated	Not Enriched in any Gastrula Dissections	-0.0207622	0.0472357	-0.0354902	0.339965	0.0717544	-1.58347	NA
Xetrov90020355m.g	LOC100490235		Late_Repressed	AnimalCap_Avg	0.0816797	1.18223	-0.0201732	1.161	0.311766	3.41805	NA
Xetrov90018035m.g	LOC100490273		Late_Repressed	Not Enriched in any Gastrula Dissections	0.426835	0.800399	0.972343	-0.268404	1.0975	0.716051	NA
Xetrov90024531m.g	LOC100490289		Early_Repressed	AnimalCap_Avg	NA	NA	6.04709	0.353568	-0.58433	-0.143684	NA
Xetrov90007764m.g	LOC100490316		Late_Activated	VegetalMass_Avg	NA	NA	NA	-2.43208	-2.59744	-1.72415	Chr03:38253829-38254227,Chr03:38229132-38229446,Chr03:38280101-38280690
Xetrov90014768m.g	LOC100490322		Late_Activated	Not Enriched in any Gastrula Dissections	-0.483382	0.150282	0.234674	0.622842	0.522437	-2.22469	NA
Xetrov90026747m.g	LOC100490389-like		Early_Activated	Dorsal_MZ_Avg	NA	-0.68338	-1.99	-0.102813	-0.504127	-1.56525	NA
Xetrov90014839m.g	LOC100490428		Late_Activated	Not Enriched in any Gastrula Dissections	-1.08081	-0.174811	0.114523	0.366564	-0.273715	-1.63958	NA
Xetrov90009470m.g	LOC100490587		Late_Repressed	Dorsal_MZ_Avg	NA	NA	NA	0.957786	1.05354	0.171942	NA
Xetrov90020356m.g	LOC100490748		Late_Repressed	AnimalCap_Avg	-0.0225603	NA	-0.569306	0.874563	0.394626	3.73214	NA
Xetrov90030510m.g	LOC100136946		Late_Activated	AnimalCap_Avg	-0.562952	-0.513215	-0.172266	-1.43634	-0.0841329	1.13779	NA
Xetrov90030001m.g	LOC100490903		Late_Repressed	VegetalMass_Avg	NA	0.440547	-0.25946	-0.0221112	1.79184	-0.990324	NA
Xetrov90020352m.g	LOC100490918		Late_Repressed	AnimalCap_Avg	NA	NA	NA	-0.0744797	1.2526	4.39055	NA
Xetrov90023619m.g	LOC100491090		Late_Repressed	VegetalMass_Avg	0.110213	0.0891188	0.319492	1.18675	1.16986	0.99505	NA
Xetrov90022647m.g	LOC100491137		Early_Repressed	Dorsal_MZ_Avg,VegetalMass_Avg	0.641423	1.50962	0.334486	0.0957081	0.730859	-0.0206728	NA
Xetrov90020360m.g	LOC100491202		Late_Repressed	Not Enriched in any Gastrula Dissections	-0.301291	-0.503305	1.25514	-0.129631	0.0772655	2.03799	NA
Xetrov90006836m.g	LOC100491214		Early_Activated	VegetalMass_Avg	NA	NA	-3.88977	NA	NA	NA	Chr02:158675612-158675974
Xetrov90006770m.g	LOC100491505		Late_Repressed	Not Enriched in any Gastrula Dissections	-0.17879	-0.594385	-0.227341	0.282132	1.57387	0.656703	NA
Xetrov90029828m.g	LOC108644798		Early_Repressed	Not Expressed in Gastrula Dissections	NA	NA	2.79711	7.76951	0.147049	-0.572134	NA
Xetrov90024605m.g	LOC100492142		Late_Repressed	Not Enriched in any Gastrula Dissections	0.238125	0.467464	-0.0573024	1.25704	-0.0805897	-0.129992	NA
Xetrov90022460m.g	LOC100492306		Late_Activated	Ventral_MZ_Avg	0.10304	-0.590056	-0.861211	NA	-1.56613	-0.835342	NA
Xetrov90028781m.g	LOC100492375		Late_Activated	Lateral_MZ_Avg	NA	NA	NA	-0.0100152	-3.33355	-1.10972	NA
Xetrov90001523m.g	lonp1		Late_Repressed	VegetalMass_Avg	0.199719	0.0682208	0.475173	1.11711	1.31241	1.39929	NA
Xetrov90015447m.g	LOC100492687	TF	Late_Repressed	Not Enriched in any Gastrula Dissections	0.347426	0.238226	0.390455	0.806115	1.02899	0.900521	NA
Xetrov90009878m.g	rnf220l; LOC100492804		Early_Repressed	Dorsal_MZ_Avg	-0.0201781	0.271696	1.1519	0.59882	0.290687	0.00763168	Chr03:130791589-130791921,Chr03:130786823-130787217,Chr03:130785075-130785265
Xetrov90019632m.g	LOC100492852		Late_Repressed	AnimalCap_Avg	NA	NA	-1.01161	1.54915	0.840657	0.495269	NA
Xetrov90015396m.g	LOC100492975		Early_Repressed	Dorsal_MZ_Avg	NA	2.63375	-0.0458779	1.2409	2.03969	NA	NA
Xetrov90019598m.g	LOC100493186		Late_Activated	Lateral_MZ_Avg	NA	NA	NA	NA	NA	-7.47342	NA
Xetrov90010232m.g	LOC100493446		Early_Activated	Not Enriched in any Gastrula Dissections	-0.574296	-1.23679	-2.60034	-0.174376	-0.383264	NA	NA
Xetrov90012121m.g	LOC100493447		Late_Activated	AnimalCap_Avg	NA	NA	-0.362921	-1.75962	-0.781685	-1.36815	NA
Xetrov90027490m.g	LOC100493468		Late_Repressed	Not Enriched in any Gastrula Dissections	NA	NA	-0.0913054	1.46228	-0.436363	0.635477	NA
Xetrov90027222m.g	LOC100493569		Late_Activated	Not Enriched in any Gastrula Dissections	0.0576853	0.0590006	-0.137315	-0.276769	-1.42398	-2.39351	NA
Xetrov90026175m.g	LOC100493614		Late_Activated	AnimalCap_Avg	NA	NA	NA	NA	-2.75079	0.406299	NA
Xetrov90017161m.g	LOC100493666		Late_Repressed	VegetalMass_Avg	-0.0861168	-0.114486	-0.112479	0.472023	0.818806	1.41862	NA
Xetrov90003245m.g	aifm3		Late_Activated	Not Enriched in any Gastrula Dissections	-0.263441	-0.132375	0.0189708	0.00693895	-0.330809	-3.89004	NA
Xetrov90011090m.g	LOC100493742		Late_Repressed	Not Enriched in any Gastrula Dissections	NA	NA	1.61064	0.779343	3.23579	0.743833	NA
Xetrov90000489m.g	tmem128		Early_Activated	Not Enriched in any Gastrula Dissections	-1.06526	-0.397309	-0.305725	0.604881	0.519666	NA	NA
Xetrov90030840m.g	LOC100494786		Late_Activated	Not Expressed in Gastrula Dissections	NA	NA	NA	NA	NA	-6.43594	NA
Xetrov90019010m.g	eps8l1		Early_Repressed	AnimalCap_Avg	-0.694833	1.74813	0.951211	0.384938	0.486831	-0.0366313	Chr07:95953135-95953388
Xetrov90017070m.g	LOC100494953		Late_Activated	Ventral_MZ_Avg	NA	NA	-0.609599	-0.588879	-1.25172	0.821958	Chr06:115722357-115722642
Xetrov90028232m.g	LOC100495011		Early_Repressed	Not Enriched in any Gastrula Dissections	1.03834	0.149323	0.618071	-0.291916	-0.481511	0.0137974	NA
Xetrov90022524m.g	LOC100495041		Early_Repressed	AnimalCap_Avg	1.53316	0.992235	0.360142	-0.120867	0.0678324	0.609258	NA
Xetrov90004430m.g	LOC105945140		Late_Activated	Not Enriched in any Gastrula Dissections	-0.000455604	0.477176	0.324985	0.0522253	0.561135	-1.06668	NA
Xetrov90016753m.g	LOC100495259		Early_Repressed	VegetalMass_Avg	-0.421477	1.44376	0.717132	0.0215141	0.0255975	0.625931	NA
Xetrov90005789m.g	LOC100495307		Late_Activated	Not Enriched in any Gastrula Dissections	-0.00987132	0.369164	-0.132146	-0.825856	-0.39344	-1.65762	NA
Xetrov90009628m.g	LOC108646285		Late_Repressed	Not Enriched in any Gastrula Dissections	-1.11582	-1.05143	-0.707526	-1.33238	1.63728	0.611676	NA
Xetrov90009576m.g	LOC101732157		Late_Repressed	Ventral_MZ_Avg	-0.0969901	NA	-0.791161	1.13942	-2.8621	2.07995	NA
Xetrov90021775m.g	LOC100495677		Late_Activated	VegetalMass_Avg	0.823647	0.633101	0.101199	-0.600156	-1.34729	-1.69888	Chr08:93811925-93812735
Xetrov90002638m.g	LOC100495683		Late_Activated	VegetalMass_Avg	NA	0.0377654	0.0816313	-1.75911	-1.35385	-0.770704	NA
Xetrov90013947m.g	LOC100495689		Late_Repressed	Not Enriched in any Gastrula Dissections	NA	NA	NA	0.667376	2.45131	0.210755	NA
Xetrov90027918m.g	LOC100495722		Early_Activated	AnimalCap_Avg	NA	-6.2299	NA	NA	NA	NA	scaffold_300:78983-79221
Xetrov90011708m.g	artn		Late_Repressed	Not Enriched in any Gastrula Dissections	NA	NA	-0.667608	NA	1.06721	3.96996	NA
Xetrov90022697m.g	xepsin		Late_Activated	AnimalCap_Avg	NA	NA	-0.514446	-1.73897	NA	NA	Chr09:2987147-2987539
Xetrov90028850m.g	LOC100496133		Late_Repressed	Not Enriched in any Gastrula Dissections	-0.00954774	0.43898	-0.152546	1.84024	2.80164	NA	NA
Xetrov90028887m.g	LOC100496360		Early_Repressed	Lateral_MZ_Avg	NA	NA	2.3097	-1.02123	2.43601	0.433388	NA
Xetrov90018505m.g	LOC100496394		Late_Activated	VegetalMass_Avg	0.632745	-0.298484	-0.0509852	-0.425449	-1.12815	-1.23855	Chr07:69347279-69347511,Chr07:69335929-69336522,Chr07:69338153-69338660
Xetrov90027558m.g	LOC100496413		Late_Activated	Not Enriched in any Gastrula Dissections	-0.314794	0.42482	-0.129021	-0.0056031	-1.95561	-2.34276	NA
Xetrov90020065m.g	LOC100496423		Late_Activated	VegetalMass_Avg	-0.891668	NA	-1.75192	-0.0533249	-0.817762	-2.31772	NA
Xetrov90014423m.g	LOC100496476		Late_Activated	Dorsal_MZ_Avg,VegetalMass_Avg	-0.0324669	-0.37416	-0.244938	-0.944756	-0.939782	-2.34245	Chr05:98396078-98396391,Chr05:98403697-98403996,Chr05:98402448-98402727
Xetrov90014068m.g	LOC100496491		Late_Repressed	VegetalMass_Avg	NA	-0.0325468	-0.153379	1.95303	0.88423	-0.282513	NA
Xetrov90003548m.g	LOC100496633		Early_Repressed	VegetalMass_Avg	0.308803	0.353903	1.01556	1.37894	1.56211	1.82065	NA
Xetrov90009579m.g	LOC100496919		Not_Annotated	Ventral_MZ_Avg	2.19618	4.53104	-0.578353	1.41166	-3.29232	0.837345	NA
Xetrov90003763m.g	LOC100496940		Late_Repressed	Not Enriched in any Gastrula Dissections	-0.521794	-0.0836571	0.0401781	1.4361	-0.726954	0.191195	NA
Xetrov90022567m.g	LOC100496974		Late_Activated	Not Enriched in any Gastrula Dissections	-0.904179	0.179264	0.133432	-0.269019	-1.11828	-1.18162	NA
Xetrov90030134m.g	LOC100497039		Late_Repressed	VegetalMass_Avg	0.133014	-0.0700161	0.156898	1.27922	1.57669	NA	NA
Xetrov90012353m.g	LOC100497256		Late_Activated	Lateral_MZ_Avg	NA	NA	NA	NA	-5.79529	-4.27975	NA
Xetrov90025683m.g	arhgap44		Late_Activated	Not Enriched in any Gastrula Dissections	-0.378761	-0.0578906	0.0789683	-0.430825	-1.1161	-0.646898	NA
Xetrov90010222m.g	LOC100497319-like		Early_Activated	AnimalCap_Avg	NA	NA	-1.88458	-0.624909	-0.43056	-0.743974	Chr04:5021392-5021623
Xetrov90011077m.g	LOC100497338		Late_Repressed	AnimalCap_Avg	NA	NA	NA	1.31874	0.576783	0.0467253	NA
Xetrov90014731m.g	LOC100497582		Late_Repressed	VegetalMass_Avg	NA	NA	NA	0.534383	2.54202	NA	NA
Xetrov90005948m.g	mcf2l		Late_Activated	VegetalMass_Avg	-0.00454531	0.161071	-0.104659	-0.148472	-0.92227	-1.56516	Chr02:112619304-112619650,Chr02:112611303-112611471,Chr02:112573806-112574464,Chr02:112584934-112585147
Xetrov90027800m.g	LOC100497813		Late_Repressed	VegetalMass_Avg	-0.28231	-0.308154	0.431436	-0.466094	1.0003	0.361795	NA
Xetrov90026070m.g	LOC100497860		Late_Activated	VegetalMass_Avg	NA	-0.211211	-0.110598	-1.4351	-0.143432	1.13977	NA
Xetrov90020243m.g	LOC100497952		Late_Repressed	AnimalCap_Avg	-0.362932	-0.00955652	0.29069	0.304812	0.244024	1.6991	NA
Xetrov90020244m.g	LOC100498107		Late_Repressed	AnimalCap_Avg	0.650846	0.20557	0.0401908	0.338427	0.336204	2.39949	NA
Xetrov90023190m.g	LOC100498032		Late_Repressed	Not Enriched in any Gastrula Dissections	NA	NA	NA	0.908118	1.56806	0.768496	NA
Xetrov90028715m.g	LOC105945219		Late_Activated	Ventral_MZ_Avg	0.573268	-0.377204	0.0534479	-1.05406	-1.81283	0.657326	NA
Xetrov90018361m.g	dtx4		Early_Repressed	AnimalCap_Avg	-0.593895	-0.668359	1.39586	0.539367	0.360568	-0.241769	NA
Xetrov90017359m.g	c3ar1		Early_Repressed	Not Enriched in any Gastrula Dissections	0.519793	-0.456917	1.36822	0.609955	-0.416129	0.929225	Chr07:780085-780331
Xetrov90026209m.g	LOC100498328		Late_Activated	Not Enriched in any Gastrula Dissections	0.115917	-0.327795	-0.924828	-1.61465	-0.570305	-1.60243	NA
Xetrov90008508m.g	LOC100498358		Late_Activated	Not Enriched in any Gastrula Dissections	0.219482	-0.541788	-0.752249	-0.271101	-0.569444	-2.09174	NA
Xetrov90017786m.g	pcdh8l		Early_Repressed	VegetalMass_Avg	-0.844128	1.40172	1.31509	1.14962	1.03802	0.40161	NA
Xetrov90018691m.g	LOC100498388		Late_Activated	Not Enriched in any Gastrula Dissections	-0.0541209	0.259281	0.143943	0.396655	0.0210211	-1.06	NA
Xetrov90028129m.g	LOC100498399		Early_Activated	AnimalCap_Avg	0.927781	-0.210138	-2.54089	-0.806544	-0.671102	0.122729	NA
Xetrov90005344m.g	grik3		Late_Activated	Not Enriched in any Gastrula Dissections	0.933879	0.609556	0.356783	-0.138323	-1.69549	NA	Chr02:80898577-80898814,Chr02:80495445-80495723
Xetrov90011283m.g	LOC100498497		Early_Repressed	Ventral_MZ_Avg,Lateral_MZ_Avg	1.13951	0.116861	0.0304326	0.029907	0.462854	0.133781	Chr04:48700660-48700844
Xetrov90005979m.g	LOC100498575		Late_Activated	AnimalCap_Avg	NA	NA	NA	NA	-8.08533	-7.90562	Chr02:115998084-115998435
Xetrov90017290m.g	LOC100498596		Late_Repressed	Not Expressed in Gastrula Dissections	NA	NA	NA	NA	1.90063	0.202953	NA
Xetrov90017743m.g	LOC101730228-like.1		Late_Activated	Not Enriched in any Gastrula Dissections	0.0430277	-0.241362	-0.0452611	0.383588	-0.0344143	-1.55342	NA
Xetrov90009274m.g	LOC108646219		Late_Activated	Not Enriched in any Gastrula Dissections	0.665693	0.761603	0.486988	0.00205584	-2.83407	0.0866795	NA
Xetrov90012941m.g	LOC101730592		Late_Activated	Not Enriched in any Gastrula Dissections	-0.135416	-1.25722	-0.72342	-0.645037	-0.604386	-1.90586	Chr05:2497479-2497869
Xetrov90009193m.g	LOC101730599		Early_Repressed	Not Enriched in any Gastrula Dissections	-0.104508	0.0381379	1.02209	1.6496	0.648093	0.607144	NA
Xetrov90011743m.g	LOC101730601		Late_Repressed	VegetalMass_Avg	NA	NA	-0.513686	3.00238	NA	-0.230092	NA
Xetrov90015427m.g	LOC100496496		Late_Activated	AnimalCap_Avg	-0.222811	0.598988	-0.188066	-0.55779	-1.40532	0.803732	NA
Xetrov90019244m.g	LOC101730844		Late_Activated	Not Enriched in any Gastrula Dissections	-0.846621	-0.269618	-0.687749	0.836953	-2.0906	1.02656	NA
Xetrov90019374m.g	LOC101730864		Late_Repressed	AnimalCap_Avg	NA	NA	1.82524	1.18969	0.140766	-0.507359	NA
Xetrov90006480m.g	LOC101733134		Early_Activated	Dorsal_MZ_Avg	-0.274177	0.458013	-2.24675	-1.32154	-0.996984	-1.83437	NA
Xetrov90028574m.g	LOC101730950		Late_Activated	Not Enriched in any Gastrula Dissections	-0.0119575	-0.451146	-0.537658	-1.2367	-1.03334	-0.729515	NA
Xetrov90010162m.g	LOC101730972		Late_Repressed	Dorsal_MZ_Avg	0.696286	0.537634	0.158088	0.568769	0.75401	1.26607	NA
Xetrov90006912m.g	LOC101731077		Not_Annotated	Ventral_MZ_Avg	NA	NA	5.52276	-0.582703	-0.929052	-3.75721	NA
Xetrov90009435m.g	LOC101731199		Late_Repressed	VegetalMass_Avg	0.35549	-0.272698	-0.155488	1.92798	-0.958019	3.44719	NA
Xetrov90006485m.g	LOC100486150		Early_Repressed	AnimalCap_Avg	1.49554	5.23186	-0.152197	-0.0895162	-0.920604	0.901871	NA
Xetrov90027626m.g	LOC101731265		Early_Repressed	Not Expressed in Gastrula Dissections	NA	NA	3.48001	NA	NA	NA	NA
Xetrov90024067m.g	LOC101731410		Late_Activated	AnimalCap_Avg	NA	NA	NA	-0.875854	-1.15973	NA	NA
Xetrov90026229m.g	LOC101730328		Not_Annotated	Ventral_MZ_Avg	-0.3298	-0.0381454	-1.58136	2.25773	0.549498	-0.342367	NA
Xetrov90027314m.g	LOC101731659		Late_Repressed	Not Enriched in any Gastrula Dissections	0.294517	0.169236	0.262024	1.14348	0.752253	0.504537	NA
Xetrov90022609m.g	LOC101731661		Early_Activated	Not Enriched in any Gastrula Dissections	-6.69899	NA	-0.00604308	-0.419094	1.6275	NA	NA
Xetrov90017278m.g	LOC101731719		Early_Repressed	Dorsal_MZ_Avg,VegetalMass_Avg	NA	NA	6.49249	1.24347	NA	NA	NA
Xetrov90024593m.g	LOC101731830		Late_Activated	AnimalCap_Avg	-0.683384	-0.00278371	-0.901365	-0.802036	-0.226485	-2.09026	NA
Xetrov90027791m.g	LOC101731836		Early_Repressed	AnimalCap_Avg	NA	NA	2.24128	0.50868	NA	NA	NA
Xetrov90005748m.g	LOC101731853		Late_Repressed	Not Expressed in Gastrula Dissections	NA	NA	NA	NA	2.12983	-0.78433	NA
Xetrov90015405m.g	LOC101732059		Early_Repressed	Not Expressed in Gastrula Dissections	NA	1.38304	2.66454	8.03092	0.507088	NA	NA
Xetrov90017348m.g	LOC101732136		Late_Repressed	AnimalCap_Avg	0.732145	0.240499	0.0675653	-0.467061	1.69266	0.292699	NA
Xetrov90004444m.g	LOC101732217		Late_Activated	Not Enriched in any Gastrula Dissections	-0.805575	-0.135884	-0.312328	-0.202329	-1.32578	-1.50623	NA
Xetrov90012593m.g	c4h3orf18		Late_Activated	VegetalMass_Avg	-0.185836	-0.082678	-1.08337	NA	NA	-3.8792	NA
Xetrov90023344m.g	LOC101732325		Late_Activated	Dorsal_MZ_Avg	NA	NA	NA	NA	NA	-3.92492	NA
Xetrov90022236m.g	LOC101732413		Late_Activated	Not Expressed in Gastrula Dissections	NA	NA	NA	NA	-3.80039	NA	NA
Xetrov90029565m.g	LOC101732446		Early_Repressed	Dorsal_MZ_Avg	NA	3.82635	-1.67474	NA	-0.199271	NA	NA
Xetrov90027261m.g	LOC101732514		Early_Repressed	AnimalCap_Avg	NA	1.21294	1.40318	-0.363631	-0.669514	-0.759355	NA
Xetrov90026150m.g	LOC100487580		Early_Repressed	Not Enriched in any Gastrula Dissections	NA	0.489318	2.20457	0.593313	-0.214209	0.490086	NA
Xetrov90011826m.g	faah.2		Late_Activated	AnimalCap_Avg	NA	NA	-0.0634422	-1.27314	0.102932	-0.784104	NA
Xetrov90023236m.g	LOC100488928		Early_Repressed	AnimalCap_Avg,VegetalMass_Avg	1.0553	-0.0153788	0.0787543	0.174319	-1.15089	0.491083	NA
Xetrov90006482m.g	LOC101732682		Early_Activated	Lateral_MZ_Avg	NA	-1.60841	1.39012	0.620333	-1.15746	-0.547306	NA
Xetrov90004221m.g	coro6		Late_Repressed	Not Enriched in any Gastrula Dissections	0.230595	0.489492	0.344977	-0.0133386	1.18917	-0.208407	NA
Xetrov90009493m.g	LOC101732995		Late_Repressed	Dorsal_MZ_Avg,VegetalMass_Avg	0.587745	0.515121	0.730089	0.300656	6.36776	NA	NA
Xetrov90026085m.g	LOC101733043		Early_Repressed	VegetalMass_Avg	-0.548768	1.51489	0.49543	0.92005	-0.805301	1.42647	NA
Xetrov90029140m.g	LOC101733080		Late_Activated	Not Enriched in any Gastrula Dissections	NA	0.204583	0.245536	-0.173	-1.1531	-0.347513	NA
Xetrov90013041m.g	c5h1orf115		Early_Activated	Ventral_MZ_Avg	NA	-0.66659	-1.676	-1.95402	-3.3115	-2.51388	Chr05:6731696-6732064,Chr05:6728822-6729247,Chr05:6730137-6730438
Xetrov90029282m.g	LOC101733159		Late_Repressed	AnimalCap_Avg	0.175494	-0.462897	0.115508	1.02662	0.73948	0.309291	NA
Xetrov90030262m.g	cat1		Late_Activated	AnimalCap_Avg	NA	NA	NA	-0.863363	-0.83079	-1.207	NA
Xetrov90006760m.g	rdx		Late_Repressed	Not Enriched in any Gastrula Dissections	0.0474269	-0.0258933	0.388078	0.974349	1.16157	0.418308	NA
Xetrov90022659m.g	LOC101733405		Late_Repressed	Not Expressed in Gastrula Dissections	NA	NA	-0.081613	4.13559	1.25534	0.669777	NA
Xetrov90026389m.g	LOC101733440		Late_Activated	Lateral_MZ_Avg,Dorsal_MZ_Avg	NA	NA	NA	-7.68612	NA	NA	NA
Xetrov90012976m.g	LOC105947466	TF	Late_Repressed	VegetalMass_Avg	0.396484	0.112614	0.593035	-0.00845099	1.42108	NA	NA
Xetrov90028778m.g	LOC101733480		Early_Repressed	AnimalCap_Avg,Dorsal_MZ_Avg	2.17748	0.179759	-0.23943	NA	-0.0503193	0.221389	NA
Xetrov90009851m.g	nanos3		Late_Repressed	VegetalMass_Avg	NA	NA	-0.223523	0.851809	1.29336	1.58811	NA
Xetrov90011211m.g	rasgrp2		Late_Repressed	Not Expressed in Gastrula Dissections	NA	NA	NA	NA	1.41331	1.07803	NA
Xetrov90004845m.g	LOC101733718		Early_Repressed	VegetalMass_Avg	0.413252	-0.725847	2.33227	0.499019	NA	0.578742	NA
Xetrov90018209m.g	LOC101733739		Early_Activated	VegetalMass_Avg	-1.6571	-0.216461	0.916643	0.874257	0.106213	NA	NA
Xetrov90009900m.g	LOC101733749		Late_Repressed	Not Enriched in any Gastrula Dissections	0.124546	0.0735481	0.673327	0.452482	2.29108	3.83729	NA
Xetrov90022560m.g	LOC101733986		Early_Repressed	Not Enriched in any Gastrula Dissections	-0.375383	1.40122	0.624685	-0.250051	-0.39137	-0.715283	NA
Xetrov90029932m.g	LOC108644489		Late_Activated	Not Enriched in any Gastrula Dissections	NA	-0.236248	-1.1147	0.0372695	-1.47253	-0.999334	NA
Xetrov90021332m.g	mdga2		Late_Repressed	Not Enriched in any Gastrula Dissections	0.103482	-0.0224439	0.26231	0.727275	1.15462	2.06529	NA
Xetrov90020354m.g	LOC101734069		Late_Repressed	AnimalCap_Avg,Dorsal_MZ_Avg	-0.196298	0.346729	-0.443399	1.13126	-0.280282	2.67086	NA
Xetrov90009424m.g	LOC101734157		Late_Repressed	VegetalMass_Avg	0.271944	-0.107439	-0.10248	0.3814	2.36049	NA	NA
Xetrov90020357m.g	LOC101734170		Late_Repressed	Not Expressed in Gastrula Dissections	NA	1.32938	NA	NA	0.255386	4.06955	NA
Xetrov90029874m.g	LOC101734284		Late_Repressed	Not Enriched in any Gastrula Dissections	-0.634063	0.213071	0.369033	0.0470271	1.02627	-0.0812481	NA
Xetrov90010260m.g	LOC105947175		Late_Activated	VegetalMass_Avg	NA	NA	-0.824227	-1.74598	-1.25184	-2.6883	Chr04:6014627-6014938,Chr04:6010685-6011121,Chr04:6012314-6012656
Xetrov90009921m.g	LOC108646199		Late_Activated	Lateral_MZ_Avg	0.607326	-0.663524	0.448547	-0.746035	-1.50665	0.329966	NA
Xetrov90022570m.g	LOC100498222		Early_Repressed	Not Enriched in any Gastrula Dissections	2.45557	1.72589	1.17267	0.596254	-0.0520906	0.00965953	NA
Xetrov90005428m.g	LOC101734635		Early_Activated	VegetalMass_Avg	0.645697	-4.52147	1.54618	0.894286	-3.89228	-0.164014	NA
Xetrov90026461m.g	LOC101734741		Early_Repressed	VegetalMass_Avg	NA	-1.60559	2.23286	0.406245	-0.128352	1.74079	NA
Xetrov90007894m.g	LOC108644508		Not_Annotated	Not Enriched in any Gastrula Dissections	-0.206107	-1.0634	1.03796	-1.18481	1.52426	-0.181463	NA
Xetrov90009016m.g	LOC101735040		Late_Activated	Not Expressed in Gastrula Dissections	NA	NA	NA	-0.994197	-2.84973	NA	NA
Xetrov90015028m.g	LOC101735051-like		Early_Repressed	Not Enriched in any Gastrula Dissections	1.51278	0.304408	1.51153	1.57768	1.34394	2.39029	NA
Xetrov90020956m.g	LOC101735112		Late_Repressed	AnimalCap_Avg	NA	NA	0.840462	-0.0107388	1.19108	-0.585873	Chr08:56632216-56632430
Xetrov90014386m.g	atp13a5		Late_Activated	Lateral_MZ_Avg	NA	NA	NA	NA	-1.10653	-5.37321	NA
Xetrov90009603m.g	LOC101735136		Not_Annotated	Not Enriched in any Gastrula Dissections	NA	0.150153	-1.54586	-1.28048	1.72495	-1.26931	NA
Xetrov90008726m.g	LOC394448		Early_Repressed	VegetalMass_Avg	0.0269056	0.143873	1.2266	2.70282	1.52321	1.769	NA
Xetrov90023319m.g	ras-dva		Late_Repressed	Dorsal_MZ_Avg,VegetalMass_Avg	0.122197	0.454233	0.784031	0.516597	1.07072	0.817684	NA
Xetrov90025213m.g	gprc5c		Late_Activated	Dorsal_MZ_Avg	-0.524211	-0.166895	0.479251	-0.640121	-1.13561	-1.93883	NA
Xetrov90023019m.g	LOC733461		Late_Activated	AnimalCap_Avg	-0.135065	0.293923	-0.25037	-1.37753	-0.570785	-0.667607	NA
Xetrov90027225m.g	LOC733474		Late_Activated	Not Enriched in any Gastrula Dissections	-0.199681	0.288772	-0.0316175	-0.139973	-0.645264	-1.1517	NA
Xetrov90004292m.g	LOC733551		Late_Repressed	VegetalMass_Avg	-0.131154	-0.208398	-0.200261	2.19428	NA	NA	Chr02:27226865-27227102
Xetrov90019498m.g	LOC733731		Late_Repressed	VegetalMass_Avg	-0.0585697	-0.195936	0.30876	2.11813	1.02373	0.255667	NA
Xetrov90005868m.g	lonrf2		Late_Repressed	Not Enriched in any Gastrula Dissections	0.113291	0.0729087	0.395085	0.595897	1.0355	0.566187	Chr02:108749592-108749923
Xetrov90006167m.g	lpar6		Early_Repressed	Not Enriched in any Gastrula Dissections	1.0798	0.22036	-0.593765	-0.732773	-0.758612	-0.686714	NA
Xetrov90000876m.g	lrat		Late_Activated	Dorsal_MZ_Avg	NA	0.200062	-1.32604	-0.0770008	-1.30181	-0.708544	NA
Xetrov90021295m.g	lrfn5		Late_Activated	Dorsal_MZ_Avg,VegetalMass_Avg	NA	NA	NA	NA	-0.69977	-2.67214	Chr08:70677810-70677984,Chr08:70643387-70643762,Chr08:70739916-70740171,Chr08:70707005-70707322,Chr08:70691620-70692083,Chr08:70639156-70639345,Chr08:70710220-70710480,Chr08:70701489-70701950
Xetrov90011726m.g	lrrc19		Late_Activated	Dorsal_MZ_Avg	NA	NA	NA	NA	NA	-3.24685	NA
Xetrov90010733m.g	lrrc36		Late_Repressed	Not Enriched in any Gastrula Dissections	-0.0418911	0.216145	-0.208741	0.254219	1.22574	0.160764	NA
Xetrov90012655m.g	lrrn1		Late_Repressed	Not Enriched in any Gastrula Dissections	0.556778	0.606724	-0.117887	0.362169	1.06581	0.178379	NA
Xetrov90011101m.g	lrrn4cl		Late_Repressed	Not Enriched in any Gastrula Dissections	NA	0.280332	0.166903	-0.123126	1.54211	0.374576	NA
Xetrov90010315m.g	madd		Early_Activated	Not Enriched in any Gastrula Dissections	-0.87161	-0.72589	-1.02654	-0.638653	-0.295507	-0.0219834	Chr04:7453836-7454103
Xetrov90025404m.g	mafb	TF	Late_Activated	Not Enriched in any Gastrula Dissections	-0.432459	-0.0140581	0.427479	-1.21516	-0.349989	0.387532	Chr10:32338552-32338999
Xetrov90013676m.g	mall		Late_Repressed	Not Expressed in Gastrula Dissections	NA	NA	NA	NA	2.25392	-0.313477	NA
Xetrov90000980m.g	maml3		Early_Activated	Not Enriched in any Gastrula Dissections	-0.0589923	-1.23524	0.953516	0.695894	-0.498085	NA	NA
Xetrov90000979m.g	maml3-like.1		Early_Repressed	Not Enriched in any Gastrula Dissections	-0.189243	-0.234425	1.04084	0.0406091	-0.288274	-1.46475	Chr01:51464343-51464645
Xetrov90011589m.g	map1lc3b		Late_Activated	Not Enriched in any Gastrula Dissections	-0.325598	-0.126655	0.0684243	-0.597854	-0.799863	-1.44741	NA
Xetrov90024797m.g	map3k14		Late_Activated	Not Expressed in Gastrula Dissections	NA	NA	NA	NA	NA	-1.94531	NA
Xetrov90021598m.g	mapkbp1		Late_Activated	Not Enriched in any Gastrula Dissections	0.193122	0.167928	0.318315	0.081911	-0.551715	-1.8453	Chr08:84807226-84807740
Xetrov90001521m.g	march2		Late_Repressed	VegetalMass_Avg	0.00184409	0.0298286	0.303213	1.2272	0.394184	-0.0571878	NA
Xetrov90017898m.g	march8		Late_Activated	Not Enriched in any Gastrula Dissections	-0.0499866	-0.0264989	0.412287	-0.36988	-1.29819	-1.38885	NA
Xetrov90006358m.g	march9		Early_Repressed	VegetalMass_Avg	0.579473	-0.0836663	1.33271	0.904963	0.496854	1.26807	NA
Xetrov90017756m.g	marveld1		Late_Repressed	VegetalMass_Avg	NA	NA	NA	1.04657	1.02491	0.878997	NA
Xetrov90014428m.g	mb21d2		Late_Activated	Not Enriched in any Gastrula Dissections	0.0540241	-0.0526032	0.106917	0.309736	-0.489141	-1.51494	Chr05:98701488-98701934
Xetrov90005546m.g	mdh2		Late_Activated	VegetalMass_Avg	0.0261867	-0.0791857	-0.201797	-0.0467247	-1.03228	-1.29625	NA
Xetrov90013604m.g	mecr		Late_Repressed	Not Enriched in any Gastrula Dissections	-0.181631	-0.0579474	0.171185	-0.195639	1.14679	-0.164481	NA
Xetrov90008147m.g	met		Late_Repressed	Dorsal_MZ_Avg	-0.603209	-0.176071	-0.170395	-0.0229049	1.84192	0.765239	NA
Xetrov90000975m.g	mgat4a		Late_Activated	Not Enriched in any Gastrula Dissections	-0.0970376	-0.125579	-0.57651	-0.656865	-0.675557	-1.47617	Chr01:51186535-51186786
Xetrov90021288m.g	mgc108213		Late_Repressed	Not Enriched in any Gastrula Dissections	0.0444876	NA	NA	1.08354	NA	NA	NA
Xetrov90027224m.g	MGC69309		Late_Activated	VegetalMass_Avg	NA	NA	NA	NA	-2.82114	-4.42326	scaffold_217:213173-213586,scaffold_217:222431-223022
Xetrov90001493m.g	misp		Late_Repressed	Dorsal_MZ_Avg	-0.498233	NA	NA	1.23197	1.59729	0.75114	NA
Xetrov90012973m.g	mix1	TF	Late_Repressed	VegetalMass_Avg	0.444402	0.227499	0.474276	-0.142767	0.445326	1.05021	Chr05:4298028-4298395
Xetrov90018939m.g	mmel1		Late_Activated	Not Enriched in any Gastrula Dissections	0.807073	0.642599	1.21353	-0.366298	-1.64403	-1.91854	Chr07:94521132-94521638
Xetrov90006839m.g	mmp13		Late_Activated	Not Enriched in any Gastrula Dissections	NA	-0.134443	-1.04245	-0.782626	-1.83354	0.185812	NA
Xetrov90017608m.g	mmp21		Late_Repressed	Not Expressed in Gastrula Dissections	NA	NA	NA	NA	2.39681	-0.949299	NA
Xetrov90018158m.g	mmrn2		Late_Activated	Not Expressed in Gastrula Dissections	NA	NA	NA	NA	-2.7135	-1.49857	Chr07:45601492-45601977,Chr07:45596307-45596723
Xetrov90018786m.g	mpzl2		Late_Activated	Not Enriched in any Gastrula Dissections	-0.0589319	-0.0202606	0.0344293	0.0259108	-0.303711	-1.81371	Chr07:84868524-84868776,Chr07:84865049-84865403,Chr07:84890236-84890818
Xetrov90018785m.g	mpzl3		Late_Activated	Not Enriched in any Gastrula Dissections	0.0283916	-0.0942795	-0.0456198	-0.00857916	-0.24099	-1.23574	NA
Xetrov90024831m.g	mrc2		Late_Repressed	Dorsal_MZ_Avg	NA	NA	0.799448	-0.351727	1.19687	0.712544	NA
Xetrov90000826m.g	msmo1		Late_Activated	VegetalMass_Avg	-0.104964	-0.470943	-0.397567	-0.527559	-0.855179	-2.1878	NA
Xetrov90015692m.g	msrb2		Late_Activated	Dorsal_MZ_Avg	0.454633	0.429136	-0.014903	0.246421	-1.2802	-0.464875	NA
Xetrov90025607m.g	mxra7		Late_Repressed	Not Expressed in Gastrula Dissections	NA	NA	NA	NA	3.23238	-0.886501	NA
Xetrov90001947m.g	myo9b		Late_Activated	Not Enriched in any Gastrula Dissections	0.150076	-0.204053	0.13878	-0.00861744	-0.526594	-1.49473	Chr01:99943355-99943841,Chr01:100011482-100011665
Xetrov90006916m.g	naalad2		Late_Activated	Not Enriched in any Gastrula Dissections	0.0508094	-0.0828946	-0.313049	-0.639195	-1.20008	-2.0118	Chr02:164332475-164333043,Chr02:164334146-164334478
Xetrov90017178m.g	ndrg1		Late_Activated	Not Enriched in any Gastrula Dissections	0.0257023	-0.150126	-0.142506	-0.377007	-1.55698	-2.74724	Chr06:126599356-126599573,Chr06:126589373-126589634,Chr06:126602482-126603041
Xetrov90009009m.g	nefl		Late_Repressed	VegetalMass_Avg	0.00918835	-0.0859758	0.175451	0.121845	0.607286	1.49763	Chr03:106637917-106638314
Xetrov90009011m.g	nefm		Late_Repressed	VegetalMass_Avg	NA	0.134128	0.484671	-0.371274	1.13647	0.705793	NA
Xetrov90016437m.g	nek10		Late_Activated	VegetalMass_Avg	-1.1305	NA	0.236139	-1.65262	0.137804	-0.261931	NA
Xetrov90027241m.g	nek6		Late_Repressed	Not Enriched in any Gastrula Dissections	-0.0826768	0.526597	0.381387	0.327124	0.967996	1.27512	NA
Xetrov90010720m.g	neto2		Early_Repressed	VegetalMass_Avg	0.251537	0.457162	1.02551	1.98432	2.22482	-0.0386869	NA
Xetrov90018222m.g	neurog3	TF	Late_Activated	Dorsal_MZ_Avg	NA	-0.93292	-0.887774	-0.477861	-2.04058	-2.20538	Chr07:51839614-51840157,Chr07:51828668-51828844,Chr07:51841390-51841758
Xetrov90015835m.g	nfatc1	TF	Early_Activated	Not Enriched in any Gastrula Dissections	-0.0526407	-0.198122	-1.19633	0.324466	0.283574	0.0183977	NA
Xetrov90013832m.g	nid1		Late_Repressed	Not Enriched in any Gastrula Dissections	0.237472	0.0947073	0.700074	-0.0826002	1.0479	0.209255	NA
Xetrov90017775m.g	nkx2-3	TF	Late_Activated	VegetalMass_Avg	NA	-0.389102	-0.0147035	-0.317625	-0.363838	-1.49284	Chr07:27026905-27027125,Chr07:27005843-27006415,Chr07:27026546-27026691,Chr07:27029645-27029852,Chr07:27008774-27009053,Chr07:27024977-27025199
Xetrov90021674m.g	nkx2-8	TF	Late_Activated	Dorsal_MZ_Avg	NA	-0.29139	-0.569568	-0.258814	-1.20182	-1.17125	Chr08:88261730-88262068,Chr08:88270839-88271186,Chr08:88253096-88253640,Chr08:88254351-88254593
Xetrov90017776m.g	nkx3-3	TF	Late_Activated	VegetalMass_Avg	NA	1.06494	NA	NA	-1.87797	-1.14001	Chr07:27050570-27050882
Xetrov90018582m.g	nnmt		Late_Repressed	VegetalMass_Avg	NA	NA	NA	0.641074	2.74661	0.898809	NA
Xetrov90009495m.g	nodal1		Late_Repressed	VegetalMass_Avg	-0.0508661	0.673235	0.420334	-0.0196293	1.64043	2.08872	Chr03:121799141-121799567
Xetrov90009490m.g	nodal3.1		Late_Repressed	Dorsal_MZ_Avg,VegetalMass_Avg	0.336883	0.923066	0.780188	0.874771	2.38939	1.56386	NA
Xetrov90009488m.g	nodal		Late_Repressed	Dorsal_MZ_Avg,VegetalMass_Avg	0.444399	0.591356	0.531813	0.758601	1.75359	1.88129	NA
Xetrov90009425m.g	nodal6		Late_Repressed	VegetalMass_Avg	0.163879	0.233257	0.918955	2.24133	2.73873	4.79717	NA
Xetrov90027580m.g	nol11		Early_Activated	Not Enriched in any Gastrula Dissections	-1.37265	-1.29441	-1.31453	-1.27316	-0.998522	-0.611877	NA
Xetrov90016451m.g	nr1d2	TF	Late_Repressed	Not Enriched in any Gastrula Dissections	-0.143812	0.0774539	0.398516	0.326788	1.113	0.255941	NA
Xetrov90012199m.g	nr5a2	TF	Late_Activated	Not Expressed in Gastrula Dissections	NA	NA	NA	NA	NA	-3.39169	NA
Xetrov90030371m.g	nrap		Late_Repressed	Not Enriched in any Gastrula Dissections	0.595659	0.0471961	-0.640641	0.220268	1.00885	0.922685	NA
Xetrov90002452m.g	nrl	TF	Late_Repressed	VegetalMass_Avg	NA	NA	0.208939	0.160884	0.511755	1.92439	Chr01:128216788-128217181
Xetrov90015633m.g	nrp1		Late_Repressed	Dorsal_MZ_Avg,VegetalMass_Avg	NA	NA	0.0248259	0.57616	1.25399	0.77919	Chr06:14503430-14503725,Chr06:14426026-14426566,Chr06:14384113-14384343,Chr06:14397159-14397561,Chr06:14413143-14413491,Chr06:14496577-14497220,Chr06:14419093-14419309,Chr06:14370184-14370387
Xetrov90019662m.g	nsmf		Late_Repressed	Not Expressed in Gastrula Dissections	-0.305549	-0.0803138	-0.247045	NA	3.74287	2.4959	NA
Xetrov90015186m.g	nt5c1a		Late_Activated	Not Enriched in any Gastrula Dissections	-0.00263742	0.0865868	-0.23579	-0.5886	-0.83529	-1.12453	Chr05:138137516-138137944
Xetrov90014263m.g	nt5e		Late_Activated	Not Expressed in Gastrula Dissections	NA	NA	NA	NA	NA	-4.19386	Chr05:87523096-87523692,Chr05:87530138-87530705
Xetrov90023360m.g	ntn3		Late_Activated	VegetalMass_Avg	NA	NA	-0.221824	-0.0601971	-0.128904	-1.11512	Chr09:16125544-16125912,Chr09:16134107-16134764,Chr09:16097573-16097905,Chr09:16122213-16122762
Xetrov90007864m.g	nuak1		Early_Repressed	Not Expressed in Gastrula Dissections	0.580487	3.01737	-0.61678	NA	NA	NA	NA
Xetrov90015188m.g	osr1	TF	Late_Activated	VegetalMass_Avg	-0.0651034	-0.0395455	0.38636	-0.3299	-0.872142	-1.69625	Chr05:138462392-138462745,Chr05:138520779-138521022,Chr05:138704845-138705080,Chr05:138526631-138527881,Chr05:138528449-138528896
Xetrov90017006m.g	otud6b		Early_Repressed	Not Enriched in any Gastrula Dissections	0.894512	1.14263	1.02787	0.805778	0.91538	0.918611	NA
Xetrov90004308m.g	ovca2		Early_Repressed	Not Enriched in any Gastrula Dissections	0.78467	1.0101	0.574301	1.0262	0.870702	0.123532	NA
Xetrov90006960m.g	p2ry2		Early_Repressed	AnimalCap_Avg	1.9038	-0.0813517	-0.440997	-0.196686	-0.0752943	0.286413	NA
Xetrov90019091m.g	pafah1b3		Late_Activated	Not Enriched in any Gastrula Dissections	0.0731205	-0.187739	-0.33068	-0.459382	-1.12924	-1.291	Chr07:99245906-99246659
Xetrov90001494m.g	palm		Late_Repressed	Dorsal_MZ_Avg	0.151536	0.417591	-0.0364383	0.0744447	1.05538	0.461922	Chr01:82025458-82025689,Chr01:82016332-82017205
Xetrov90020063m.g	pappa		Late_Repressed	Not Enriched in any Gastrula Dissections	NA	NA	NA	1.11907	1.07989	0.0585454	Chr08:13817782-13818132,Chr08:13839797-13839985
Xetrov90017452m.g	papss2		Late_Repressed	AnimalCap_Avg	-0.0594865	NA	0.267245	-0.322811	1.50193	-0.722769	NA
Xetrov90011945m.g	pars2		Late_Repressed	Not Enriched in any Gastrula Dissections	0.00342249	0.121233	0.312726	0.770764	1.03991	0.200242	NA
Xetrov90004053m.g	patl2		Late_Activated	Not Enriched in any Gastrula Dissections	0.00268416	-0.173035	-0.794739	-1.19261	-1.76275	-1.4334	NA
Xetrov90006112m.g	pcdh8		Late_Repressed	VegetalMass_Avg	0.589726	-0.393362	0.217527	1.16105	1.53088	0.753493	Chr02:128643000-128643330
Xetrov90006089m.g	pcdh9		Late_Repressed	VegetalMass_Avg	NA	0.333242	0.246061	0.666953	1.85664	1.74594	Chr02:124917164-124917486,Chr02:124845067-124845343
Xetrov90007620m.g	pcyox1l		Late_Repressed	VegetalMass_Avg	0.118716	-0.021765	-0.141913	0.472299	0.78737	1.33957	NA
Xetrov90014633m.g	pcyt1a		Late_Repressed	Not Enriched in any Gastrula Dissections	0.378129	0.6715	0.90622	1.09052	1.33616	0.92613	NA
Xetrov90010920m.g	pddc1		Early_Activated	Not Enriched in any Gastrula Dissections	-1.02862	-0.958848	-0.672656	-0.828954	-0.799492	-0.616161	NA
Xetrov90030189m.g	pdk4		Early_Repressed	AnimalCap_Avg	1.46807	-0.337355	0.809926	-0.032553	-0.315853	0.258097	scaffold_73:365625-365904
Xetrov90011612m.g	pdp2		Late_Repressed	Dorsal_MZ_Avg	NA	NA	1.60752	1.38616	1.52799	-0.0129637	Chr04:69418749-69419191
Xetrov90018732m.g	pex10		Late_Repressed	Not Enriched in any Gastrula Dissections	-0.0354828	0.0229098	0.371756	1.14485	0.800212	0.363324	Chr07:81505465-81505854
Xetrov90020695m.g	pglyrp1		Late_Repressed	AnimalCap_Avg	NA	NA	0.63253	0.294018	0.161918	1.75117	NA
Xetrov90023250m.g	pgp		Late_Activated	VegetalMass_Avg	-0.139967	0.0523687	-0.507378	-1.34157	-1.85766	-1.87805	Chr09:13532234-13533018
Xetrov90004569m.g	phex		Late_Activated	Not Expressed in Gastrula Dissections	NA	NA	NA	NA	NA	-5.93809	NA
Xetrov90004562m.g	phka2		Late_Activated	Not Enriched in any Gastrula Dissections	0.544965	0.430968	-0.547363	-0.933935	-2.07631	-1.91298	Chr02:40418358-40418749
Xetrov90019218m.g	phlda2		Late_Repressed	Not Enriched in any Gastrula Dissections	0.151723	0.406234	0.687039	0.595072	0.643064	1.16137	NA
Xetrov90020424m.g	picalm.1		Late_Repressed	VegetalMass_Avg	-0.176505	-0.265444	-0.196547	1.65476	0.6409	-0.87015	NA
Xetrov90020184m.g	pih1d3		Late_Activated	Not Enriched in any Gastrula Dissections	0.0120337	0.211805	-0.160693	-0.2839	-0.391406	-1.37932	NA
Xetrov90007336m.g	pitx1	TF	Late_Repressed	VegetalMass_Avg	NA	NA	-0.85013	0.264549	1.14991	1.02142	Chr03:16904330-16904586
Xetrov90017959m.g	pla2g12b		Late_Activated	Not Enriched in any Gastrula Dissections	NA	0.606453	0.486102	0.553038	-0.407838	-1.92378	NA
Xetrov90002710m.g	plbd2		Late_Activated	Not Enriched in any Gastrula Dissections	-0.0705103	-0.240725	-0.143985	0.0901547	-1.0095	-0.939703	NA
Xetrov90003621m.g	plcxd3		Late_Repressed	Not Enriched in any Gastrula Dissections	NA	-0.494933	-0.0173477	-0.381566	3.33466	NA	NA
Xetrov90017537m.g	plekha1		Late_Activated	Not Enriched in any Gastrula Dissections	0.0694587	-0.0435433	0.129451	0.065716	-0.762349	-1.38031	Chr07:10665509-10665788
Xetrov90026195m.g	plekhs1		Late_Repressed	Not Enriched in any Gastrula Dissections	-0.494724	-0.110779	NA	1.78198	1.29838	2.41425	NA
Xetrov90013310m.g	pnpt1		Late_Repressed	Not Enriched in any Gastrula Dissections	0.0525567	0.132671	0.106635	0.353867	0.840246	1.31313	NA
Xetrov90027571m.g	polg2		Late_Activated	Not Enriched in any Gastrula Dissections	-1.17405	0.187306	-0.00692532	-0.136135	-1.4505	-1.15855	NA
Xetrov90020590m.g	pou4f1.2	TF	Late_Activated	AnimalCap_Avg	NA	NA	NA	-2.08564	-2.56004	-2.06952	Chr08:43964960-43965383
Xetrov90021433m.g	ppp1r13b		Late_Repressed	VegetalMass_Avg	-0.102584	0.00730032	0.178823	0.879818	1.1558	1.17798	NA
Xetrov90010499m.g	ppp1r32		Late_Repressed	AnimalCap_Avg	NA	NA	0.591163	2.09234	1.9707	1.03676	NA
Xetrov90024984m.g	ppp1r9b		Late_Repressed	Not Expressed in Gastrula Dissections	NA	NA	NA	NA	0.408863	1.39133	NA
Xetrov90001372m.g	prdm8	TF	Late_Activated	VegetalMass_Avg	0.0819656	-0.0217714	0.372135	-0.661017	-1.54501	-0.0654618	Chr01:76494519-76495224
Xetrov90021515m.g	prkch		Late_Activated	Not Enriched in any Gastrula Dissections	-0.0188923	-0.137199	-0.351193	-0.52846	-0.793468	-1.12092	Chr08:81849256-81849494,Chr08:81883935-81884202
Xetrov90004854m.g	ptafr		Late_Repressed	Not Expressed in Gastrula Dissections	NA	NA	NA	NA	1.62492	2.83227	NA
Xetrov90007051m.g	ptn		Early_Repressed	Not Enriched in any Gastrula Dissections	1.10812	-0.143664	0.611857	0.235408	-0.149899	-0.592995	NA
Xetrov90012899m.g	ptprg		Late_Repressed	Not Enriched in any Gastrula Dissections	0.149214	0.159868	0.159139	0.111083	0.580928	1.08377	NA
Xetrov90019305m.g	ptprh		Late_Repressed	Not Enriched in any Gastrula Dissections	-0.0249898	0.647844	0.203607	-0.224448	1.5918	NA	NA
Xetrov90015762m.g	pttg1ip.2		Late_Repressed	VegetalMass_Avg	-0.0466607	0.0973706	0.39795	0.72586	1.20032	1.03871	NA
Xetrov90006496m.g	pycard		Early_Repressed	AnimalCap_Avg	NA	0.582084	1.14176	0.229473	-0.37332	0.377916	NA
Xetrov90008751m.g	pygo1		Late_Repressed	VegetalMass_Avg	-0.110187	-0.170994	0.252268	1.51692	-0.193103	-0.120439	NA
Xetrov90008208m.g	qrich1.2		Late_Repressed	VegetalMass_Avg	-0.0447695	0.0367199	0.121871	0.303337	1.02803	0.0440945	NA
Xetrov90000317m.g	rab11fip5		Late_Repressed	Not Enriched in any Gastrula Dissections	-0.0885434	-0.181649	0.275641	0.944825	1.00422	0.77061	NA
Xetrov90022308m.g	rab25		Late_Repressed	AnimalCap_Avg	-0.371729	NA	0.483635	1.47661	0.521939	-0.00247203	NA
Xetrov90010185m.g	rag2		Early_Activated	Not Enriched in any Gastrula Dissections	0.183015	-1.70293	-0.177257	0.730325	0.0327675	NA	NA
Xetrov90005585m.g	rai2		Late_Activated	Not Expressed in Gastrula Dissections	-0.22464	-0.658664	0.315641	NA	-1.94397	-1.26	Chr02:91274097-91274442
Xetrov90014500m.g	rarres1		Late_Repressed	VegetalMass_Avg	-0.266796	-0.203507	-0.938168	1.21139	0.50333	0.252621	NA
Xetrov90023121m.g	rasd1		Late_Activated	VegetalMass_Avg	0.610858	0.480713	0.345522	-0.277683	-1.18473	-0.638816	Chr09:9924121-9924520
Xetrov90006721m.g	rasl11a		Late_Repressed	Not Enriched in any Gastrula Dissections	NA	NA	NA	4.81942	4.65378	4.28844	NA
Xetrov90004065m.g	rcan1		Late_Activated	Not Enriched in any Gastrula Dissections	0.0198481	0.0269479	-0.12744	-0.43416	-1.41156	-2.43921	Chr02:10403321-10403698
Xetrov90006223m.g	rdh5		Late_Activated	VegetalMass_Avg	0.181469	-0.573813	-0.440569	-1.203	-1.99815	-1.33485	Chr02:133858466-133858717
Xetrov90016472m.g	rftn1		Late_Activated	Dorsal_MZ_Avg	NA	NA	-2.33773	NA	-1.44611	-1.30043	Chr06:80029307-80029766,Chr06:80039146-80039527
Xetrov90030625m.g	rgs10		Late_Activated	Not Enriched in any Gastrula Dissections	NA	NA	NA	NA	NA	-5.70653	NA
Xetrov90003057m.g	rimbp2		Late_Activated	Not Expressed in Gastrula Dissections	0.939578	NA	NA	-0.278235	-0.474708	-2.27619	Chr01:149442720-149443016,Chr01:149411682-149412020,Chr01:149405152-149405500
Xetrov90014163m.g	ripply2.1		Late_Repressed	Dorsal_MZ_Avg	NA	NA	NA	1.11072	0.395994	0.201701	Chr05:81150159-81150501,Chr05:81147904-81148287
Xetrov90011778m.g	ror1		Late_Activated	Not Enriched in any Gastrula Dissections	-0.402129	-0.188792	-0.17312	1.29193	0.39182	-1.35394	Chr04:78764743-78765035
Xetrov90017082m.g	rspo2		Early_Repressed	VegetalMass_Avg	NA	0.360721	1.35347	0.495086	0.482126	0.224104	Chr06:116532264-116533047,Chr06:116530208-116530569
Xetrov90009688m.g	s1pr5		Early_Repressed	AnimalCap_Avg	0.0289267	1.23562	0.29086	-0.103983	-0.361127	-0.0249839	NA
Xetrov90002564m.g	sall2	TF	Early_Repressed	Dorsal_MZ_Avg	NA	-0.322744	1.06594	0.500747	0.272595	-0.658793	NA
Xetrov90021352m.g	samd4a		Late_Repressed	Not Enriched in any Gastrula Dissections	-0.041387	0.0413417	0.276557	0.538173	0.892127	1.08424	Chr08:74478747-74479057
Xetrov90025706m.g	samd9l		Early_Repressed	Not Enriched in any Gastrula Dissections	-0.0578964	-0.0638859	1.19798	1.05309	1.03314	0.898158	NA
Xetrov90014498m.g	schip1		Late_Activated	Not Enriched in any Gastrula Dissections	0.124299	-0.117619	-0.137243	0.406657	-0.659082	-1.19356	Chr05:103636230-103636428,Chr05:103624356-103624952,Chr05:103596794-103597044
Xetrov90022383m.g	scnm1		Late_Activated	Not Enriched in any Gastrula Dissections	0.35746	0.743143	0.389489	-0.189685	-1.20624	-2.17863	NA
Xetrov90023386m.g	scnn1b		Late_Activated	Not Expressed in Gastrula Dissections	NA	NA	NA	NA	NA	-2.10465	Chr09:16810564-16811006
Xetrov90018597m.g	sdhd		Early_Repressed	VegetalMass_Avg	0.0680508	0.510557	1.13549	1.66505	1.28306	0.890171	NA
Xetrov90030043m.g	sel1l3		Late_Repressed	Not Expressed in Gastrula Dissections	NA	NA	NA	NA	2.06601	1.44256	NA
Xetrov90002769m.g	selplg		Late_Activated	VegetalMass_Avg	-0.42703	-1.03112	0.222495	-0.130156	-0.111917	-1.55931	Chr01:137931684-137932025
Xetrov90003310m.g	sema6a		Late_Activated	Not Enriched in any Gastrula Dissections	0.180774	0.0533605	-0.173828	-0.713945	-1.42608	-1.49028	Chr01:162790336-162790840,Chr01:162793679-162793926,Chr01:162616168-162616896,Chr01:162825969-162826189,Chr01:162773735-162774284
Xetrov90008349m.g	sephs1		Late_Activated	Not Enriched in any Gastrula Dissections	0.293163	-0.250228	-0.895722	-1.25144	-1.5418	-1.81922	NA
Xetrov90003007m.g	sept5		Late_Activated	AnimalCap_Avg	0.573693	-0.305455	-0.223933	-1.01622	-1.00353	-1.68549	NA
Xetrov90008679m.g	shf		Late_Repressed	Not Enriched in any Gastrula Dissections	-0.0247588	0.162826	0.177625	0.471808	0.862744	1.15251	NA
Xetrov90014507m.g	shox2	TF	Late_Repressed	VegetalMass_Avg	0.444428	-0.385583	-0.224803	0.501049	1.16089	-0.379748	NA
Xetrov90028980m.g	sia1	TF	Late_Repressed	Dorsal_MZ_Avg,VegetalMass_Avg	0.0129705	0.31538	0.179946	0.083388	1.65276	NA	NA
Xetrov90014736m.g	siah2		Late_Activated	VegetalMass_Avg	-0.107912	0.035759	-0.218262	-0.113591	-0.27808	-2.30717	NA
Xetrov90030702m.g	sidt1		Late_Repressed	Not Enriched in any Gastrula Dissections	-0.30978	0.240679	-0.0196935	1.02142	1.26513	0.333905	scaffold_85:146866-147119
Xetrov90030430m.g	sipa1l1		Early_Repressed	Not Enriched in any Gastrula Dissections	1.22951	3.15451	NA	3.21681	NA	NA	NA
Xetrov90021521m.g	six1	TF	Late_Activated	VegetalMass_Avg	NA	NA	-0.0160181	-1.50492	-0.921018	-0.79445	Chr08:82158964-82159407,Chr08:82165595-82165841
Xetrov90017181m.g	sla		Late_Activated	Dorsal_MZ_Avg,VegetalMass_Avg	NA	0.459777	0.18105	-0.62222	-0.827871	-1.57768	Chr06:126780217-126780607,Chr06:126770451-126771263
Xetrov90008789m.g	slc12a1		Late_Activated	VegetalMass_Avg	NA	0.197728	-0.840509	-0.208077	-0.539627	-2.77042	NA
Xetrov90009152m.g	sla		Late_Activated	Not Enriched in any Gastrula Dissections	-0.196777	0.138777	-0.0971504	-0.13831	-0.120907	-1.04981	Chr03:111221845-111222044,Chr03:111197256-111197688
Xetrov90006145m.g	slc25a30		Late_Activated	Not Enriched in any Gastrula Dissections	-0.09694	-0.0695831	-0.423912	-0.670032	-0.95146	-1.09705	Chr02:130677674-130678121
Xetrov90002313m.g	slc28a3		Late_Activated	Dorsal_MZ_Avg	NA	-0.587137	-0.646216	-1.02611	-1.12433	-1.34875	NA
Xetrov90017132m.g	slc30a8		Late_Repressed	AnimalCap_Avg	0.751349	-0.696964	1.17451	0.230015	1.40816	-0.825506	NA
Xetrov90030044m.g	slc34a2		Late_Activated	AnimalCap_Avg	NA	NA	0.572163	0.556667	-1.02418	-1.90059	scaffold_69:729832-730141,scaffold_69:731937-732136
Xetrov90008874m.g	slc39a1		Late_Activated	VegetalMass_Avg	-0.0655322	-0.0943709	-0.0212303	-0.00922871	-1.12604	-1.39579	Chr03:97498882-97499170
Xetrov90028750m.g	slc3a1		Late_Activated	VegetalMass_Avg	NA	NA	-0.665432	-1.29412	-2.24727	-5.74214	NA
Xetrov90011158m.g	slc3a2		Late_Activated	Not Enriched in any Gastrula Dissections	0.273733	-0.248026	0.0184782	-0.396259	-1.82326	-2.47497	NA
Xetrov90023819m.g	slc40a1		Not_Annotated	AnimalCap_Avg	-0.621648	-0.151835	1.34068	-1.3132	-0.43356	0.385383	NA
Xetrov90005086m.g	slc45a3		Late_Repressed	VegetalMass_Avg	-0.0655756	-0.169648	-0.326677	0.527955	1.33073	0.141999	Chr02:65054737-65055077
Xetrov90007796m.g	slc5a8		Late_Activated	Dorsal_MZ_Avg,VegetalMass_Avg	-0.244139	0.373993	-0.274958	-0.97656	-1.4789	-2.56287	Chr03:39269291-39269658,Chr03:39262190-39262441,Chr03:39265822-39266288,Chr03:39261645-39261855
Xetrov90012706m.g	slc6a6		Late_Repressed	Lateral_MZ_Avg	0.460592	-0.437	-0.57198	0.320801	2.07767	0.583424	NA
Xetrov90011987m.g	smg7		Late_Activated	Not Enriched in any Gastrula Dissections	0.00696795	-0.150084	-0.709349	-1.08917	-0.949071	-0.969053	NA
Xetrov90004313m.g	smyd4		Late_Repressed	Not Enriched in any Gastrula Dissections	0.0804893	0.195757	0.232668	0.874483	1.08397	0.921101	NA
Xetrov90016785m.g	snai2	TF	Late_Repressed	VegetalMass_Avg	-0.178964	-0.270844	0.389637	-0.0334223	1.22026	0.310083	Chr06:98704376-98704609,Chr06:98678717-98678978,Chr06:98656338-98656616,Chr06:98682507-98682875,Chr06:98681272-98681458
Xetrov90025199m.g	socs3		Late_Repressed	Not Enriched in any Gastrula Dissections	NA	0.0488756	0.55708	-0.0143497	0.0964347	3.40174	Chr10:23175451-23175741
Xetrov90019236m.g	socs3.1		Late_Activated	Not Enriched in any Gastrula Dissections	0.232929	-0.378677	-0.416496	-0.748283	-1.19911	-0.809614	NA
Xetrov90005036m.g	sort1		Late_Repressed	VegetalMass_Avg	0.0944026	0.143938	0.461046	0.545062	0.961925	1.06343	Chr02:63089833-63090063,Chr02:63078342-63078595,Chr02:63046075-63046366
Xetrov90016800m.g	sox17a	TF	Early_Repressed	VegetalMass_Avg	0.39901	0.801493	1.06247	1.27232	1.26811	1.4858	Chr06:100277485-100278182,Chr06:100279055-100279423,Chr06:100258735-100259401,Chr06:100274022-100274525,Chr06:100254598-100254903
Xetrov90016802m.g	sox17b.1	TF	Early_Repressed	VegetalMass_Avg	0.551961	0.775833	1.0375	1.14893	0.580487	1.31262	Chr06:100296608-100297005,Chr06:100297092-100297412,Chr06:100294301-100294686,Chr06:100294858-100295306
Xetrov90016803m.g	sox17b.2	TF	Early_Repressed	VegetalMass_Avg	0.14424	0.760125	1.19151	1.33392	1.1294	1.51206	Chr06:100309361-100309607,Chr06:100307228-100308232
Xetrov90005954m.g	sox1	TF	Late_Repressed	VegetalMass_Avg	0.403594	-0.54723	-0.0653067	0.489642	1.2285	-0.159887	Chr02:113067758-113068061,Chr02:112966660-112966926
Xetrov90006036m.g	sox21	TF	Early_Activated	Not Enriched in any Gastrula Dissections	0.247954	-0.322092	-1.08997	-0.911741	-1.28911	-0.527311	Chr02:119243826-119244225,Chr02:119216527-119216727
Xetrov90009685m.g	spc24		Late_Repressed	VegetalMass_Avg	0.00220551	0.0980477	0.380252	0.892779	1.20185	0.931066	NA
Xetrov90011048m.g	spdyc		Late_Repressed	VegetalMass_Avg	-0.0360529	0.0675597	0.107319	1.055	1.10651	0.246169	NA
Xetrov90019401m.g	spib	TF	Late_Repressed	Dorsal_MZ_Avg	NA	NA	NA	0.907235	2.57002	2.6492	NA
Xetrov90024733m.g	srcin1		Late_Repressed	VegetalMass_Avg	0.220856	0.265061	-0.045287	0.44648	1.12853	-0.402734	Chr10:4316209-4316584
Xetrov90024292m.g	ssb		Late_Activated	Not Enriched in any Gastrula Dissections	0.0503904	-0.200393	-0.467221	-1.0519	-1.83249	-1.45597	NA
Xetrov90017176m.g	st3gal1		Late_Activated	Dorsal_MZ_Avg	NA	NA	-0.418513	-1.85421	-1.89882	-2.17418	NA
Xetrov90019761m.g	st6galnac4		Late_Activated	Dorsal_MZ_Avg,VegetalMass_Avg	0.10501	0.29453	-0.0111886	-0.835027	-1.03548	-1.60702	Chr08:2584065-2584474
Xetrov90026198m.g	stat3.2	TF	Late_Repressed	Not Enriched in any Gastrula Dissections	0.172762	0.261355	0.451204	1.1145	1.478	1.81527	NA
Xetrov90002053m.g	svep1		Late_Activated	Not Expressed in Gastrula Dissections	1.15398	-0.951325	-0.00362689	0.31491	-0.165566	-1.55216	Chr01:103700218-103700716,Chr01:103753602-103753909
Xetrov90009192m.g	tacr1		Late_Activated	Not Expressed in Gastrula Dissections	NA	NA	NA	NA	0.488128	-1.86092	Chr03:112611552-112611901,Chr03:112698775-112699109,Chr03:112585692-112585955,Chr03:112664078-112664709
Xetrov90020644m.g	tap1		Late_Activated	Not Enriched in any Gastrula Dissections	1.08172	NA	0.0621198	0.0348038	-1.60707	-1.28212	NA
Xetrov90011519m.g	tat		Early_Repressed	Not Enriched in any Gastrula Dissections	1.18474	0.0623779	-0.0558571	-0.187275	0.0764257	0.0806729	Chr04:63550401-63550761,Chr04:63549250-63549600,Chr04:63533418-63533670,Chr04:63509563-63510012
Xetrov90007135m.g	tbc1d9b		Late_Repressed	Not Enriched in any Gastrula Dissections	-0.0986932	-0.0876572	0.283706	0.450019	0.734729	1.11288	NA
Xetrov90016503m.g	tbx20	TF	Late_Repressed	VegetalMass_Avg	NA	NA	1.33874	0.922237	1.58957	1.09403	Chr06:81709098-81709482
Xetrov90028716m.g	tbxas1		Early_Repressed	AnimalCap_Avg	0.49864	-0.0631331	2.64607	0.812471	NA	0.075261	NA
Xetrov90021209m.g	tc2n		Late_Repressed	Not Expressed in Gastrula Dissections	NA	NA	NA	NA	2.12399	-0.949947	NA
Xetrov90009199m.g	tet3		Early_Repressed	Dorsal_MZ_Avg	0.020271	1.20031	-0.516664	-0.201367	-0.234132	-0.965791	NA
Xetrov90016561m.g	tfap2a	TF	Early_Repressed	AnimalCap_Avg	1.10109	0.390672	-0.0977191	-0.240865	-0.107965	-0.0585146	Chr06:84398038-84398375,Chr06:84417278-84417469,Chr06:84234942-84235123,Chr06:84420720-84420961
Xetrov90026138m.g	tfap2b	TF	Early_Repressed	VegetalMass_Avg	NA	NA	1.52926	1.57734	1.08168	0.490025	NA
Xetrov90001669m.g	theg		Late_Repressed	AnimalCap_Avg	-1.02826	0.685536	0.73694	1.07095	1.77168	1.15913	NA
Xetrov90011723m.g	tie1		Late_Repressed	Not Enriched in any Gastrula Dissections	-0.149739	-0.23474	-0.0480098	-0.0359355	0.356581	1.32957	NA
Xetrov90024476m.g	tmbim1		Late_Repressed	Not Enriched in any Gastrula Dissections	0.0486301	0.225695	0.118013	0.270063	0.727319	1.16234	NA
Xetrov90016370m.g	tmem108		Early_Activated	VegetalMass_Avg	-1.86611	-1.16756	-0.587367	NA	-0.0713607	NA	Chr06:71473754-71474102
Xetrov90003179m.g	tmem116		Early_Repressed	Dorsal_MZ_Avg,VegetalMass_Avg	NA	NA	1.89881	1.16688	0.795417	0.869963	NA
Xetrov90002698m.g	tmem119		Late_Repressed	VegetalMass_Avg	0.448195	-1.43556	-0.564045	0.469596	1.30307	1.25424	NA
Xetrov90011728m.g	tmem125		Late_Activated	Not Enriched in any Gastrula Dissections	-0.39542	-0.442124	-0.629229	-1.02123	-0.585613	-1.779	Chr04:75284357-75284697
Xetrov90003064m.g	tmem132c		Early_Activated	Not Enriched in any Gastrula Dissections	0.468605	-0.560376	-1.36543	-1.16613	-1.44674	NA	NA
Xetrov90006931m.g	tmem135		Late_Repressed	Not Enriched in any Gastrula Dissections	-0.232173	-0.157791	-0.00355391	0.649787	2.27217	NA	Chr02:165081012-165081371,Chr02:165074303-165074587,Chr02:165073000-165073260
Xetrov90005840m.g	tmem182		Late_Repressed	Not Enriched in any Gastrula Dissections	0.141232	-0.497733	-0.347985	0.323595	2.16412	-0.0737756	Chr02:107460807-107461126,Chr02:107376276-107376634
Xetrov90002263m.g	tmem2		Late_Repressed	Not Enriched in any Gastrula Dissections	0.149811	0.228133	0.583867	1.12506	0.806732	-0.081179	Chr01:118105039-118105275,Chr01:118053730-118054062
Xetrov90018009m.g	tmem72		Late_Activated	AnimalCap_Avg	NA	-0.0340945	0.49722	0.102259	-1.4265	-2.17832	NA
Xetrov90017079m.g	tmem74		Late_Activated	Ventral_MZ_Avg,VegetalMass_Avg	-0.494008	-0.254898	-1.20319	NA	NA	-3.46985	NA
Xetrov90022384m.g	tmod4		Early_Repressed	Not Enriched in any Gastrula Dissections	0.742441	1.90754	0.208093	1.59067	0.784058	-0.111968	NA
Xetrov90017418m.g	tnfrsf1a		Late_Repressed	Not Enriched in any Gastrula Dissections	0.0330501	0.224087	-0.174463	0.225743	-0.139902	1.39136	NA
Xetrov90014441m.g	tp63	TF	Early_Repressed	AnimalCap_Avg,Ventral_MZ_Avg	NA	NA	1.22335	0.150674	0.482915	-0.0159722	NA
Xetrov90019751m.g	trex2		Late_Repressed	Dorsal_MZ_Avg	NA	0.605663	0.781854	-0.0344371	-0.258962	1.08965	NA
Xetrov90013802m.g	trim50		Late_Activated	Not Expressed in Gastrula Dissections	0.577527	0.716836	NA	NA	NA	-2.96248	NA
Xetrov90002277m.g	trpm6		Late_Activated	Not Enriched in any Gastrula Dissections	NA	1.23655	0.0790393	-1.28587	-2.0839	-2.03667	NA
Xetrov90010175m.g	tspan18		Late_Activated	AnimalCap_Avg	NA	NA	NA	NA	NA	-2.90762	NA
Xetrov90008032m.g	tspan8		Not_Annotated	Not Enriched in any Gastrula Dissections	1.13129	-1.53566	2.42316	1.3252	1.17183	-0.0261024	NA
Xetrov90024019m.g	tspear		Early_Repressed	Lateral_MZ_Avg	2.71166	1.0605	-0.858458	-0.381396	1.98368	-0.682623	NA
Xetrov90011947m.g	ttc22		Late_Repressed	AnimalCap_Avg	NA	NA	NA	NA	1.79488	0.326492	NA
Xetrov90018820m.g	ttc36		Late_Activated	Not Enriched in any Gastrula Dissections	0.866667	-0.163875	0.581716	0.431155	-1.44947	-3.08583	NA
Xetrov90025235m.g	ttyh2		Late_Activated	Not Enriched in any Gastrula Dissections	NA	NA	0.663058	-1.06096	-0.862315	-1.53879	Chr10:25032380-25032783,Chr10:24992244-24992803,Chr10:25034721-25035079
Xetrov90030541m.g	tub	TF	Late_Repressed	Not Enriched in any Gastrula Dissections	0.33479	-0.222185	-0.618138	0.424574	1.31417	0.196642	NA
Xetrov90024559m.g	tubal3		Late_Activated	Not Enriched in any Gastrula Dissections	0.120582	-0.0424813	0.107355	-0.00245457	-0.0425975	-1.51945	NA
Xetrov90011523m.g	tubb3		Late_Activated	VegetalMass_Avg	0.0272914	-0.491755	-0.669806	-0.966804	-1.61745	-1.68844	Chr04:63670191-63670497
Xetrov90003840m.g	ube2r2		Late_Activated	Not Enriched in any Gastrula Dissections	-0.419652	-0.463327	-0.627672	-1.11164	-1.29395	-0.738939	NA
Xetrov90021619m.g	ubr1		Late_Repressed	Not Enriched in any Gastrula Dissections	0.00322242	-0.0726602	0.133404	0.410604	0.59233	1.05956	NA
Xetrov90004289m.g	unc119		Late_Activated	Not Enriched in any Gastrula Dissections	0.13991	0.250867	0.0954668	0.0905328	-0.411603	-1.42905	Chr02:27087912-27088117,Chr02:27097790-27098198,Chr02:27095918-27096468
Xetrov90025566m.g	unc13d		Late_Repressed	Not Expressed in Gastrula Dissections	0.653265	NA	-0.398499	NA	NA	2.25828	NA
Xetrov90021241m.g	unc79		Late_Repressed	Not Expressed in Gastrula Dissections	NA	NA	0.0883776	1.99546	0.109533	-0.485152	NA
Xetrov90023553m.g	uncx	TF	Early_Repressed	VegetalMass_Avg	NA	2.00904	1.42979	0.781281	2.47754	1.10155	Chr09:23499783-23500195,Chr09:23403118-23403579,Chr09:23395757-23396040
Xetrov90005521m.g	usp32		Late_Activated	Not Enriched in any Gastrula Dissections	0.0676816	-0.135681	0.0619105	0.126285	0.00825804	-1.62188	Chr02:88940333-88940880
Xetrov90013081m.g	vash2		Late_Activated	Ventral_MZ_Avg	0.435476	-1.26845	-0.425617	-0.342575	-0.679978	-1.39795	Chr05:10532601-10532828,Chr05:10504786-10505188
Xetrov90017639m.g	ventx3.1	TF	Late_Activated	VegetalMass_Avg	0.602738	-0.214633	0.13989	-0.52763	-1.16266	-0.948471	Chr07:18619816-18620089,Chr07:18623095-18623332
Xetrov90023426m.g	vwa3a		Late_Repressed	Not Enriched in any Gastrula Dissections	-0.0593305	-0.566157	-0.0303177	1.19389	0.397293	1.16622	NA
Xetrov90004499m.g	wbscr27		Late_Activated	VegetalMass_Avg	-0.0907844	0.0788355	-0.809397	0.0484459	-1.18936	-1.31074	NA
Xetrov90007000m.g	wnt11r		Late_Activated	VegetalMass_Avg	0.176986	0.0963703	0.327523	0.828349	-1.73075	-3.11828	NA
Xetrov90004009m.g	wrb		Late_Activated	Not Enriched in any Gastrula Dissections	-0.119417	0.10929	-0.308567	-0.385632	-0.85578	-1.3156	Chr02:7705624-7706149
Xetrov90003194m.g	wscd2		Late_Activated	Not Enriched in any Gastrula Dissections	-0.172095	0.541888	-0.147904	-1.02333	0.536654	-0.217883	NA
Xetrov90000049m.g	Xetrov90000049m.g		Late_Repressed	VegetalMass_Avg	NA	NA	0.611966	0.164167	1.29664	0.562636	NA
Xetrov90000056m.g	Xetrov90000056m.g		Late_Repressed	VegetalMass_Avg	NA	NA	0.831292	1.03703	1.21867	0.634229	NA
Xetrov90000443m.g	LOC100496125		Late_Repressed	Not Enriched in any Gastrula Dissections	-0.809986	-0.000270105	0.271005	-0.0608636	1.21881	0.152156	NA
Xetrov90000639m.g	Xetrov90000639m.g		Late_Activated	Not Enriched in any Gastrula Dissections	-0.0881001	-0.0598343	-0.176895	-0.0476729	-1.12383	-0.562648	NA
Xetrov90000669m.g	Xetrov90000669m.g		Late_Repressed	VegetalMass_Avg	NA	1.23501	0.0965051	0.607537	2.33252	NA	Chr01:30842301-30843079
Xetrov90000829m.g	apela		Early_Repressed	Not Enriched in any Gastrula Dissections	1.06357	0.353664	0.129577	-0.0783772	-0.0259568	-0.11546	Chr01:42226287-42226597,Chr01:42211486-42211973
Xetrov90001051m.g	Xetrov90001051m.g		Late_Repressed	Not Enriched in any Gastrula Dissections	0.987799	-0.823727	-0.506398	NA	6.70787	NA	NA
Xetrov90001056m.g	Xetrov90001056m.g		Early_Activated	Not Expressed in Gastrula Dissections	-3.61102	NA	-0.277937	NA	NA	NA	NA
Xetrov90001099m.g	Xetrov90001099m.g		Early_Repressed	Not Enriched in any Gastrula Dissections	-0.0608298	0.324834	1.01866	1.20752	0.776978	0.521351	Chr01:59472299-59472632,Chr01:59448157-59448370
Xetrov90001108m.g	Xetrov90001108m.g		Late_Repressed	Not Enriched in any Gastrula Dissections	-0.146315	-0.224464	0.312125	0.653632	1.13635	-0.763622	NA
Xetrov90001274m.g	Xetrov90001274m.g		Late_Repressed	Ventral_MZ_Avg	NA	NA	NA	NA	6.60141	NA	Chr01:71697744-71698260
Xetrov90002054m.g	Xetrov90002054m.g		Not_Annotated	Lateral_MZ_Avg	NA	7.14081	-1.53719	-2.94807	1.66363	-9.19538	NA
Xetrov90002283m.g	Xetrov90002283m.g		Late_Activated	AnimalCap_Avg	NA	NA	NA	-0.152723	-7.1492	NA	NA
Xetrov90002789m.g	Xetrov90002789m.g		Late_Repressed	Not Expressed in Gastrula Dissections	NA	NA	NA	NA	NA	6.03824	NA
Xetrov90003530m.g	Xetrov90003530m.g		Late_Repressed	Lateral_MZ_Avg	NA	NA	0.320091	-0.0133677	2.28671	NA	Chr01:176367558-176368182
Xetrov90003550m.g	Xetrov90003550m.g		Not_Annotated	VegetalMass_Avg	NA	1.11206	-2.77315	1.32093	0.625646	0.318157	NA
Xetrov90003552m.g	Xetrov90003552m.g		Late_Activated	Not Enriched in any Gastrula Dissections	NA	-1.89797	0.0850703	-2.28233	-0.715331	1.24937	NA
Xetrov90003693m.g	LOC101730448		Late_Activated	VegetalMass_Avg	NA	-1.28098	-1.17823	NA	-0.118245	-2.62675	NA
Xetrov90003697m.g	Xetrov90003697m.g		Early_Repressed	Not Enriched in any Gastrula Dissections	NA	2.50231	-0.672895	NA	0.700563	NA	NA
Xetrov90003880m.g	Xetrov90003880m.g		Late_Activated	Dorsal_MZ_Avg	NA	NA	NA	-6.20793	NA	NA	NA
Xetrov90003982m.g	Xetrov90003982m.g		Early_Activated	Not Enriched in any Gastrula Dissections	-1.52399	-0.0985645	-0.538247	0.571639	0.773981	0.636726	NA
Xetrov90004063m.g	LOC105946608		Late_Repressed	Not Expressed in Gastrula Dissections	-1.82252	1.55554	0.115719	NA	3.1867	NA	NA
Xetrov90004151m.g	epha6		Late_Repressed	Not Enriched in any Gastrula Dissections	0.119351	0.294728	0.475715	1.05302	0.830274	0.311866	NA
Xetrov90004206m.g	Xetrov90004206m.g		Late_Repressed	Not Enriched in any Gastrula Dissections	NA	NA	NA	1.81761	2.39006	NA	NA
Xetrov90004459m.g	Xetrov90004459m.g		Not_Annotated	Not Expressed in Gastrula Dissections	NA	NA	-1.60486	7.32332	-0.107175	-1.56172	NA
Xetrov90004970m.g	Xetrov90004970m.g		Early_Repressed	Ventral_MZ_Avg	2.26209	-1.03647	0.593507	0.403364	-0.841984	-0.862092	NA
Xetrov90004980m.g	Xetrov90004980m.g		Late_Repressed	Not Expressed in Gastrula Dissections	NA	NA	NA	NA	2.13753	0.25755	NA
Xetrov90005064m.g	Xetrov90005064m.g		Late_Activated	Not Enriched in any Gastrula Dissections	-0.331201	0.10112	-0.0279476	-0.590147	-1.42416	-1.8029	NA
Xetrov90005404m.g	LOC105946487		Late_Repressed	AnimalCap_Avg,Dorsal_MZ_Avg	NA	NA	-1.74011	-0.875854	-1.34748	6.80702	Chr02:82631032-82631354,Chr02:82646485-82646836,Chr02:82643818-82644292
Xetrov90005614m.g	Xetrov90005614m.g		Early_Activated	Not Expressed in Gastrula Dissections	NA	-2.51337	-1.00815	NA	NA	1.46909	NA
Xetrov90006284m.g	LOC105946554		Late_Activated	Not Enriched in any Gastrula Dissections	0.113413	-0.561189	-0.729214	-0.451156	-1.12439	-0.779346	NA
Xetrov90006824m.g	Xetrov90006824m.g		Early_Repressed	Not Enriched in any Gastrula Dissections	NA	2.14724	-1.00258	0.798126	0.38372	0.43969	NA
Xetrov90006872m.g	Xetrov90006872m.g		Late_Activated	Not Enriched in any Gastrula Dissections	0.262728	0.763756	0.284145	0.0318344	-0.755424	-2.16321	NA
Xetrov90006878m.g	LOC101732802		Late_Activated	AnimalCap_Avg	-1.10622	NA	NA	NA	-2.58557	1.27195	NA
Xetrov90007059m.g	Xetrov90007059m.g		Late_Repressed	Not Enriched in any Gastrula Dissections	NA	NA	-0.156121	0.796355	1.64466	2.01735	NA
Xetrov90007604m.g	LOC101733442		Early_Repressed	VegetalMass_Avg	NA	-0.309662	2.12857	NA	NA	-0.471365	NA
Xetrov90007733m.g	Xetrov90007733m.g		Early_Activated	Not Enriched in any Gastrula Dissections	-2.12434	0.0682142	0.0628293	0.0271273	0.300014	-0.281115	NA
Xetrov90007734m.g	Xetrov90007734m.g		Late_Repressed	Dorsal_MZ_Avg	NA	-0.155553	-1.09691	1.62919	0.664564	0.0583912	NA
Xetrov90007736m.g	Xetrov90007736m.g		Early_Activated	Not Enriched in any Gastrula Dissections	NA	-1.22583	-1.7285	0.2534	NA	0.105868	NA
Xetrov90007902m.g	Xetrov90007902m.g		Early_Repressed	Not Enriched in any Gastrula Dissections	NA	2.9495	-0.481669	2.67595	0.272365	-0.357906	NA
Xetrov90007903m.g	Xetrov90007903m.g		Late_Repressed	Not Enriched in any Gastrula Dissections	1.52456	-0.690427	0.585116	-0.79922	1.70756	1.33293	NA
Xetrov90009151m.g	Xetrov90009151m.g		Late_Activated	VegetalMass_Avg	0.191744	0.353901	-0.0735638	-0.273121	-0.493303	-1.08224	NA
Xetrov90009440m.g	ddhd2		Late_Activated	Not Enriched in any Gastrula Dissections	-0.439679	-0.767809	-0.843556	-0.898353	-1.13251	-0.864859	NA
Xetrov90009441m.g	LOC100497150		Late_Activated	Not Enriched in any Gastrula Dissections	-0.275316	-0.91623	-0.804661	-1.48124	-0.81254	0.520972	NA
Xetrov90009608m.g	LOC101734776		Not_Annotated	Lateral_MZ_Avg	NA	1.38685	0.574116	-1.7108	-0.204368	NA	NA
Xetrov90009640m.g	LOC101732908		Not_Annotated	Lateral_MZ_Avg	-7.76062	-3.9194	0.222941	0.0878513	1.59582	2.84022	NA
Xetrov90009661m.g	Xetrov90009661m.g		Late_Repressed	VegetalMass_Avg	0.223269	0.868689	-0.226703	0.68262	1.20206	0.680337	NA
Xetrov90009691m.g	Xetrov90009691m.g		Late_Repressed	Dorsal_MZ_Avg,VegetalMass_Avg	NA	-0.113495	0.382009	1.46674	0.76025	2.61239	Chr03:127420436-127420874
Xetrov90009695m.g	Xetrov90009695m.g		Early_Repressed	Ventral_MZ_Avg,Dorsal_MZ_Avg	NA	-1.00473	2.55898	1.90048	3.04178	1.02403	NA
Xetrov90009741m.g	Xetrov90009741m.g		Not_Annotated	Dorsal_MZ_Avg	NA	6.79536	-5.98197	1.72747	-0.540232	-0.615422	NA
Xetrov90009756m.g	Xetrov90009756m.g		Late_Repressed	Dorsal_MZ_Avg	NA	0.732405	NA	1.73818	0.319506	NA	NA
Xetrov90009768m.g	Xetrov90009768m.g		Late_Repressed	Not Expressed in Gastrula Dissections	NA	NA	NA	NA	NA	9.7219	NA
Xetrov90009871m.g	Xetrov90009871m.g		Late_Repressed	VegetalMass_Avg	NA	-0.0194355	0.270019	-0.551175	1.40776	-0.186532	NA
Xetrov90009976m.g	Xetrov90009976m.g		Late_Activated	Not Enriched in any Gastrula Dissections	-0.262564	-0.0761877	-0.106453	-1.01964	-0.15633	-0.525024	NA
Xetrov90009984m.g	Xetrov90009984m.g		Late_Repressed	Dorsal_MZ_Avg	0.875225	0.995167	-0.21658	0.0626126	1.35929	-0.14218	NA
Xetrov90009985m.g	Xetrov90009985m.g		Early_Activated	Not Expressed in Gastrula Dissections	NA	NA	-4.07694	NA	-1.60156	NA	NA
Xetrov90009986m.g	Xetrov90009986m.g		Late_Repressed	Not Enriched in any Gastrula Dissections	-0.809908	0.296476	0.187091	0.0238997	1.16373	0.867525	NA
Xetrov90009987m.g	Xetrov90009987m.g		Late_Activated	Not Enriched in any Gastrula Dissections	0.390803	0.644163	0.512266	-2.87149	0.0848783	-0.0221535	NA
Xetrov90009988m.g	Xetrov90009988m.g		Early_Activated	Ventral_MZ_Avg,Dorsal_MZ_Avg	NA	-1.94517	-0.445983	-1.14172	-2.41096	-2.47934	NA
Xetrov90009992m.g	Xetrov90009992m.g		Late_Repressed	AnimalCap_Avg,Dorsal_MZ_Avg	-0.32491	-0.530155	-1.13463	2.37339	1.43104	1.30357	NA
Xetrov90009993m.g	Xetrov90009993m.g		Early_Repressed	Ventral_MZ_Avg	2.30288	0.891663	-0.0192674	1.80007	2.04157	0.0146544	NA
Xetrov90010193m.g	Xetrov90010193m.g		Late_Activated	AnimalCap_Avg	NA	NA	NA	NA	-3.55046	NA	NA
Xetrov90010487m.g	LOC101732650		Late_Activated	Not Expressed in Gastrula Dissections	NA	NA	NA	NA	-8.87836	NA	NA
Xetrov90010616m.g	LOC100485343		Late_Repressed	Dorsal_MZ_Avg,VegetalMass_Avg	NA	NA	0.0312678	1.55994	2.60841	1.63566	NA
Xetrov90010631m.g	Xetrov90010631m.g		Late_Repressed	Dorsal_MZ_Avg	NA	NA	NA	0.468758	1.28077	2.98182	NA
Xetrov90010663m.g	Xetrov90010663m.g		Late_Repressed	VegetalMass_Avg	-0.0492366	-0.322204	-0.175481	0.0806605	1.41538	0.770277	Chr04:20669831-20670112
Xetrov90011059m.g	Xetrov90011059m.g		Late_Activated	Not Enriched in any Gastrula Dissections	0.979019	0.0405918	-0.0711684	-0.308198	0.261144	-1.25732	NA
Xetrov90011069m.g	Xetrov90011069m.g		Late_Activated	Not Enriched in any Gastrula Dissections	NA	-0.323722	0.286149	-0.415905	0.31633	-1.19051	NA
Xetrov90011071m.g	Xetrov90011071m.g		Late_Activated	Not Enriched in any Gastrula Dissections	NA	-0.515579	-0.588933	0.0113948	0.618394	-1.48021	NA
Xetrov90011184m.g	Xetrov90011184m.g		Late_Repressed	Not Enriched in any Gastrula Dissections	-0.0403915	0.688768	0.190713	1.1828	1.36392	0.203942	NA
Xetrov90011340m.g	Xetrov90011340m.g		Late_Repressed	Not Enriched in any Gastrula Dissections	0.481135	0.11653	0.247312	0.220991	1.05226	-0.459618	NA
Xetrov90011481m.g	Xetrov90011481m.g		Late_Activated	VegetalMass_Avg	0.0449405	-0.164763	-0.265294	0.277912	-0.0891113	-1.60218	NA
Xetrov90011599m.g	Xetrov90011599m.g		Late_Repressed	Not Expressed in Gastrula Dissections	NA	NA	0.691469	NA	2.78748	-0.260411	NA
Xetrov90012215m.g	Xetrov90012215m.g		Late_Repressed	Not Enriched in any Gastrula Dissections	NA	0.432731	0.0351454	0.742881	1.01533	0.323494	NA
Xetrov90012312m.g	Xetrov90012312m.g		Not_Annotated	AnimalCap_Avg	6.62591	-1.03094	0.478405	-0.457003	0.23104	-0.276663	NA
Xetrov90012668m.g	Xetrov90012668m.g		Late_Repressed	Not Enriched in any Gastrula Dissections	0.190845	0.330161	0.689467	0.992399	1.47561	1.34131	NA
Xetrov90012828m.g	Xetrov90012828m.g		Late_Repressed	VegetalMass_Avg	-0.0329414	0.347114	0.149523	0.0810334	1.65886	NA	NA
Xetrov90012981m.g	LOC100491743		Late_Repressed	VegetalMass_Avg	0.0123455	-0.138093	0.321457	0.368208	0.667642	1.73751	NA
Xetrov90013043m.g	Xetrov90013043m.g		Late_Repressed	Not Enriched in any Gastrula Dissections	0.377425	0.228005	0.21967	1.19056	0.253714	1.06616	NA
Xetrov90013145m.g	slc3a1.2		Late_Activated	VegetalMass_Avg	NA	NA	-0.0311821	-0.988492	-2.32032	-3.92699	Chr05:14815883-14816597
Xetrov90013471m.g	LOC101734009		Late_Repressed	Not Enriched in any Gastrula Dissections	-1.58387	0.730247	0.248889	NA	1.73336	-0.970585	NA
Xetrov90013709m.g	LOC100484994		Late_Activated	Dorsal_MZ_Avg,VegetalMass_Avg	0.438578	0.349113	0.49527	-0.188186	-0.0488228	-1.14063	NA
Xetrov90014028m.g	col10a1		Late_Activated	VegetalMass_Avg	0.578791	0.382839	0.444566	-0.568794	0.0984108	-2.09838	NA
Xetrov90014101m.g	Xetrov90014101m.g		Late_Repressed	Not Enriched in any Gastrula Dissections	-0.118448	-0.208983	0.333121	0.390207	1.31346	-0.412323	NA
Xetrov90014125m.g	smim12		Early_Repressed	Ventral_MZ_Avg	-0.315055	1.60473	1.66927	3.87734	3.79071	-0.164014	NA
Xetrov90014619m.g	Xetrov90014619m.g		Early_Activated	Not Expressed in Gastrula Dissections	-0.0569363	0.506803	-3.04088	NA	NA	NA	NA
Xetrov90014631m.g	tfrc		Late_Repressed	Not Enriched in any Gastrula Dissections	0.0481101	-0.0652778	0.030852	1.54065	0.230887	0.518784	NA
Xetrov90015164m.g	Xetrov90015164m.g		Late_Repressed	Not Enriched in any Gastrula Dissections	0.0860846	0.143169	-0.105037	-0.0469904	1.13348	0.655491	NA
Xetrov90015293m.g	Xetrov90015293m.g		Late_Activated	Not Expressed in Gastrula Dissections	1.17638	NA	NA	NA	-6.13941	NA	NA
Xetrov90015345m.g	Xetrov90015345m.g		Late_Activated	Dorsal_MZ_Avg,VegetalMass_Avg	NA	NA	NA	NA	1.84162	-5.32379	NA
Xetrov90015369m.g	ephx2		Early_Repressed	AnimalCap_Avg	0.0768249	0.509106	1.34264	0.247997	-0.00552367	-0.251601	Chr05:146286463-146286755
Xetrov90015387m.g	Xetrov90015387m.g		Late_Activated	Not Expressed in Gastrula Dissections	NA	-0.860746	NA	NA	NA	-5.58073	NA
Xetrov90015392m.g	Xetrov90015392m.g		Early_Repressed	Not Enriched in any Gastrula Dissections	0.254532	1.68096	0.0487536	-0.0278615	0.258636	0.571287	NA
Xetrov90015411m.g	Xetrov90015411m.g		Late_Activated	Not Enriched in any Gastrula Dissections	0.0393381	1.4229	-0.45731	-2.03211	0.426304	-1.10791	NA
Xetrov90015412m.g	Xetrov90015412m.g		Early_Activated	Not Enriched in any Gastrula Dissections	-1.09381	0.707587	-0.542774	-0.79679	0.756644	0.376284	NA
Xetrov90015414m.g	Xetrov90015414m.g		Early_Repressed	AnimalCap_Avg	NA	NA	1.61104	2.07219	NA	-1.7684	Chr06:524627-524848
Xetrov90015421m.g	LOC105945412		Late_Activated	Not Enriched in any Gastrula Dissections	-0.0359743	0.0513873	-0.0221887	-0.153071	-0.837506	-1.23066	Chr06:594743-595260,Chr06:602783-603059,Chr06:596402-596887
Xetrov90015423m.g	LOC100497127		Late_Activated	Not Enriched in any Gastrula Dissections	-0.228684	-0.843877	-1.00424	-0.931438	-1.62436	-1.65992	NA
Xetrov90015428m.g	LOC100498492		Early_Activated	Ventral_MZ_Avg,VegetalMass_Avg	-1.35982	-0.647595	-1.28861	0.532608	-0.0120506	-0.0188162	Chr06:667583-668002
Xetrov90015435m.g	Xetrov90015435m.g		Early_Activated	Not Enriched in any Gastrula Dissections	-2.74587	-1.55923	-1.47888	-1.64679	-0.189742	NA	NA
Xetrov90015439m.g	LOC101733242		Early_Repressed	Lateral_MZ_Avg	1.46107	0.478699	-0.126899	3.1684	-0.361987	-2.17306	Chr06:851808-852142,Chr06:858407-858828
Xetrov90015440m.g	Xetrov90015440m.g		Early_Repressed	AnimalCap_Avg	NA	NA	1.61104	2.07219	NA	-1.7684	NA
Xetrov90015441m.g	Xetrov90015441m.g		Early_Activated	Ventral_MZ_Avg,VegetalMass_Avg	-1.50908	0.0411694	0.786483	NA	0.877295	1.74281	NA
Xetrov90015614m.g	Xetrov90015614m.g		Early_Repressed	Ventral_MZ_Avg	2.85272	0.138298	0.337674	-0.203407	-0.40053	-0.98538	NA
Xetrov90015797m.g	LOC101730635		Late_Activated	Not Expressed in Gastrula Dissections	-0.0511267	NA	NA	NA	0.646171	-2.72708	NA
Xetrov90016017m.g	Xetrov90016017m.g		Late_Activated	Not Expressed in Gastrula Dissections	NA	NA	NA	NA	NA	-1.63677	NA
Xetrov90016201m.g	Xetrov90016201m.g		Late_Repressed	AnimalCap_Avg,VegetalMass_Avg	-2.18675	1.19481	0.192716	-0.270206	1.57532	0.805014	Chr06:55638760-55639047,Chr06:55689253-55689506
Xetrov90016585m.g	Xetrov90016585m.g		Late_Repressed	VegetalMass_Avg	0.266738	NA	NA	NA	3.74679	NA	NA
Xetrov90016846m.g	Xetrov90016846m.g		Late_Activated	Not Enriched in any Gastrula Dissections	0.62816	0.414074	-0.0710327	-1.74526	-1.1385	1.26654	Chr06:102286514-102286710
Xetrov90016963m.g	Xetrov90016963m.g		Early_Activated	VegetalMass_Avg	-0.103411	-0.627985	-1.21602	-0.0682529	-0.538181	-0.810695	NA
Xetrov90017145m.g	Xetrov90017145m.g		Early_Repressed	Not Enriched in any Gastrula Dissections	1.2836	0.0576292	0.30303	0.090701	-0.882278	0.472322	NA
Xetrov90017160m.g	Xetrov90017160m.g		Early_Activated	Not Enriched in any Gastrula Dissections	NA	-2.9889	NA	-1.11635	1.12179	0.689655	NA
Xetrov90017204m.g	Xetrov90017204m.g		Late_Activated	Not Enriched in any Gastrula Dissections	NA	NA	NA	-0.345453	-2.85063	-0.971626	Chr06:129260633-129261177,Chr06:129262631-129262873
Xetrov90017247m.g	Xetrov90017247m.g		Late_Activated	Lateral_MZ_Avg	NA	NA	-1.93929	-1.82485	0.55885	-0.0769987	NA
Xetrov90017257m.g	Xetrov90017257m.g		Late_Repressed	AnimalCap_Avg	NA	NA	0.369115	0.0999881	1.37565	-0.0411415	NA
Xetrov90017432m.g	Xetrov90017432m.g		Early_Repressed	VegetalMass_Avg	2.79601	0.493254	0.438074	-0.373643	0.27776	-0.6287	NA
Xetrov90017549m.g	LOC100485916		Early_Activated	VegetalMass_Avg	-1.13686	-0.150869	0.00356894	-0.396692	0.381989	1.24253	NA
Xetrov90017963m.g	LOC105947826		Late_Repressed	Not Expressed in Gastrula Dissections	0.387495	-0.781024	0.319261	NA	2.58237	NA	NA
Xetrov90018088m.g	Xetrov90018088m.g		Early_Repressed	Ventral_MZ_Avg	NA	1.79379	1.75091	0.805457	0.229293	NA	NA
Xetrov90018420m.g	robo4		Late_Activated	Not Enriched in any Gastrula Dissections	NA	NA	NA	0.0880639	NA	-2.62181	Chr07:64958363-64958577
Xetrov90018628m.g	Xetrov90018628m.g		Late_Activated	Not Expressed in Gastrula Dissections	NA	NA	NA	NA	-6.13628	NA	Chr07:75911704-75912397
Xetrov90018993m.g	LOC101731073		Early_Repressed	Not Enriched in any Gastrula Dissections	2.6417	-1.78542	-0.706938	NA	-0.377233	-0.233372	NA
Xetrov90019217m.g	Xetrov90019217m.g		Late_Repressed	Dorsal_MZ_Avg	-0.0138954	0.286519	0.560024	0.543799	0.874294	1.14535	Chr07:103272968-103273332
Xetrov90019238m.g	LOC101731078		Not_Annotated	Not Enriched in any Gastrula Dissections	1.21978	-0.242225	-2.49944	1.08372	1.45572	1.59713	NA
Xetrov90019283m.g	Xetrov90019283m.g		Late_Repressed	Dorsal_MZ_Avg	-1.99132	1.74311	-0.725267	0.145058	1.5476	0.822182	NA
Xetrov90019375m.g	Xetrov90019375m.g		Late_Activated	Ventral_MZ_Avg	NA	NA	NA	NA	-7.78993	-1.88735	NA
Xetrov90019631m.g	fcgbp		Late_Repressed	Not Expressed in Gastrula Dissections	NA	NA	0.85938	1.6314	1.07373	-0.0578871	NA
Xetrov90019645m.g	fxyd3		Late_Activated	Not Enriched in any Gastrula Dissections	NA	NA	-1.22562	-0.807466	-2.95515	-1.07092	Chr07:117200181-117201071
Xetrov90019740m.g	Xetrov90019740m.g		Late_Repressed	Not Enriched in any Gastrula Dissections	NA	NA	-0.988194	-0.553736	3.64292	-0.241898	NA
Xetrov90019859m.g	prdm12	TF	Late_Repressed	VegetalMass_Avg	NA	1.12338	0.66187	1.31605	1.28581	-0.138785	Chr08:5702788-5703027,Chr08:5700711-5701047
Xetrov90019863m.g	Xetrov90019863m.g		Late_Repressed	Not Enriched in any Gastrula Dissections	-1.38151	0.2344	-0.899713	-0.351624	1.52037	-0.500436	NA
Xetrov90019984m.g	scai		Late_Activated	Not Enriched in any Gastrula Dissections	-0.104222	0.0548296	-0.342351	-0.306867	-1.13495	-0.562727	NA
Xetrov90020098m.g	Xetrov90020098m.g		Early_Activated	Ventral_MZ_Avg	-1.30015	0.0913134	-2.69753	-1.2485	-0.0227806	NA	Chr08:15824888-15825130
Xetrov90020101m.g	Xetrov90020101m.g		Early_Activated	VegetalMass_Avg	-0.492219	0.545787	-2.76584	NA	-6.03479	0.972037	NA
Xetrov90020117m.g	Xetrov90020117m.g		Early_Activated	VegetalMass_Avg	-0.492219	0.545787	-2.76584	NA	-6.03479	0.972037	NA
Xetrov90020126m.g	Xetrov90020126m.g		Early_Activated	Not Expressed in Gastrula Dissections	-1.82644	NA	NA	NA	NA	NA	NA
Xetrov90020137m.g	Xetrov90020137m.g		Late_Repressed	Lateral_MZ_Avg,VegetalMass_Avg	NA	NA	NA	2.30107	NA	1.83181	NA
Xetrov90020143m.g	Xetrov90020143m.g		Late_Activated	Not Expressed in Gastrula Dissections	NA	NA	NA	NA	NA	-5.58073	NA
Xetrov90020168m.g	LOC108644438		Early_Activated	AnimalCap_Avg,Lateral_MZ_Avg	-2.16029	0.325485	NA	-0.0975347	1.03399	-0.279278	NA
Xetrov90020242m.g	LOC108648340		Early_Repressed	AnimalCap_Avg	NA	2.6516	0.185321	0.198162	0.260925	2.1208	NA
Xetrov90020340m.g	Xetrov90020340m.g		Early_Activated	Dorsal_MZ_Avg	0.326681	-1.84581	-1.21074	-1.01138	0.472088	-0.14489	NA
Xetrov90020358m.g	LOC100489887		Late_Repressed	AnimalCap_Avg	-0.348168	-0.514413	0.0586684	0.674664	0.615791	3.93857	NA
Xetrov90020637m.g	Xetrov90020637m.g		Late_Repressed	Dorsal_MZ_Avg	NA	NA	0.830909	0.118369	1.13121	0.214857	NA
Xetrov90020830m.g	Xetrov90020830m.g		Late_Repressed	AnimalCap_Avg	NA	NA	NA	NA	2.80659	1.53162	NA
Xetrov90021350m.g	Xetrov90021350m.g		Late_Repressed	Not Enriched in any Gastrula Dissections	0.395735	0.0500916	0.0778688	0.559589	0.647676	1.23744	NA
Xetrov90021805m.g	Xetrov90021805m.g		Early_Activated	Not Enriched in any Gastrula Dissections	1.10398	-2.22131	-0.337817	0.205654	-0.313792	-0.145816	NA
Xetrov90022035m.g	LOC100490822		Late_Repressed	Not Expressed in Gastrula Dissections	NA	NA	NA	NA	5.81809	NA	NA
Xetrov90022182m.g	Xetrov90022182m.g		Late_Repressed	VegetalMass_Avg	NA	NA	NA	0.370791	1.23997	1.34099	NA
Xetrov90022202m.g	LOC100488631		Late_Repressed	VegetalMass_Avg	-0.455119	NA	-0.127383	NA	5.53239	0.375662	Chr08:108565610-108565998
Xetrov90022297m.g	Xetrov90022297m.g		Late_Activated	Not Expressed in Gastrula Dissections	NA	NA	-0.264305	NA	-2.33179	NA	Chr08:111427396-111427688,Chr08:111405506-111405813
Xetrov90022502m.g	LOC101731074		Not_Annotated	Lateral_MZ_Avg	2.08746	0.729803	1.06135	-1.16265	-1.04756	-0.233687	NA
Xetrov90022507m.g	LOC100487588		Early_Repressed	AnimalCap_Avg	0.301943	1.57473	-0.288322	-0.331475	-0.406816	1.2121	NA
Xetrov90022509m.g	LOC100487756		Late_Repressed	Lateral_MZ_Avg	0.124675	-0.223631	-0.854223	0.820804	2.31026	-0.618345	NA
Xetrov90022511m.g	Xetrov90022511m.g		Early_Activated	AnimalCap_Avg,Lateral_MZ_Avg	-3.25674	0.00814728	-4.33598	0.134434	-2.6225	-7.73041	NA
Xetrov90022521m.g	LOC100488538		Not_Annotated	Not Expressed in Gastrula Dissections	NA	0.364646	-2.2987	6.52109	-1.65466	-3.79474	NA
Xetrov90022523m.g	Xetrov90022523m.g		Not_Annotated	Ventral_MZ_Avg	1.27443	-0.431437	1.53971	-6.357	-1.10048	-0.967249	NA
Xetrov90022526m.g	LOC108648869		Early_Activated	Not Expressed in Gastrula Dissections	-7.09066	NA	NA	NA	NA	NA	NA
Xetrov90022529m.g	Xetrov90022529m.g		Late_Repressed	Ventral_MZ_Avg	-3.2672	3.97952	-0.436603	NA	1.97561	NA	NA
Xetrov90022540m.g	Xetrov90022540m.g		Early_Repressed	Not Enriched in any Gastrula Dissections	-0.845562	2.76031	-0.500419	-0.0114939	-0.166535	0.0500162	NA
Xetrov90022542m.g	Xetrov90022542m.g		Late_Activated	Ventral_MZ_Avg,Dorsal_MZ_Avg	NA	NA	NA	NA	-3.89394	-1.55409	NA
Xetrov90022543m.g	LOC100488903		Not_Annotated	Not Enriched in any Gastrula Dissections	NA	0.714381	-1.57397	0.94843	1.16759	1.69366	NA
Xetrov90022548m.g	LOC101730877		Early_Activated	Lateral_MZ_Avg	-0.157514	-2.40518	1.29411	NA	NA	-1.03647	NA
Xetrov90022553m.g	Xetrov90022553m.g		Late_Activated	Not Enriched in any Gastrula Dissections	0.59971	-0.216844	-0.477297	-2.16761	-2.56489	-1.57401	NA
Xetrov90022559m.g	Xetrov90022559m.g		Not_Annotated	VegetalMass_Avg	-6.35659	1.28265	-1.06095	1.69663	0.236763	7.02071	NA
Xetrov90022561m.g	Xetrov90022561m.g		Early_Repressed	VegetalMass_Avg	-1.50237	1.60636	0.752141	0.84853	-0.956454	-0.277115	NA
Xetrov90022565m.g	LOC105947140		Late_Activated	Dorsal_MZ_Avg	0.170199	NA	0.937714	-1.09778	0.689778	2.01838	NA
Xetrov90022575m.g	Xetrov90022575m.g		Early_Repressed	Dorsal_MZ_Avg	6.97685	0.0992016	1.58281	-0.553874	2.8018	-1.72982	NA
Xetrov90022576m.g	LOC105947139		Not_Annotated	Dorsal_MZ_Avg	-1.04747	-0.616562	1.6451	-0.574089	-1.35256	-1.31743	NA
Xetrov90022579m.g	Xetrov90022579m.g		Early_Repressed	Not Enriched in any Gastrula Dissections	-0.413573	1.14449	-0.293361	-0.0247544	-0.48354	0.00985448	NA
Xetrov90022593m.g	LOC100497614		Early_Repressed	Not Enriched in any Gastrula Dissections	NA	2.10212	0.637188	-0.441749	-0.380716	0.499552	NA
Xetrov90022611m.g	hist2h2be		Not_Annotated	Ventral_MZ_Avg	-0.66904	3.11493	0.522065	-1.05178	-1.18127	0.822179	NA
Xetrov90022612m.g	LOC101730817		Late_Activated	Not Enriched in any Gastrula Dissections	1.17091	NA	0.128865	-6.93585	0.626277	NA	NA
Xetrov90022613m.g	Xetrov90022613m.g		Not_Annotated	Dorsal_MZ_Avg	-0.402253	2.8214	NA	0.656265	NA	-2.33108	NA
Xetrov90022658m.g	LOC108648788		Late_Repressed	VegetalMass_Avg	NA	NA	NA	NA	2.15034	NA	NA
Xetrov90022698m.g	Xetrov90022698m.g		Late_Activated	Lateral_MZ_Avg	NA	NA	-0.438065	0.0506251	-1.8779	-0.728417	NA
Xetrov90022813m.g	Xetrov90022813m.g		Late_Repressed	Not Expressed in Gastrula Dissections	NA	NA	NA	NA	2.26443	-0.521792	NA
Xetrov90022852m.g	Xetrov90022852m.g		Late_Repressed	Not Enriched in any Gastrula Dissections	-0.230712	NA	0.462842	0.679688	1.31054	0.551913	NA
Xetrov90023025m.g	LOC105948515		Late_Repressed	Not Enriched in any Gastrula Dissections	-0.106271	0.141957	-0.339693	-0.193079	-0.0546407	1.31848	NA
Xetrov90023075m.g	Xetrov90023075m.g		Late_Activated	AnimalCap_Avg	NA	NA	NA	NA	NA	-6.5939	NA
Xetrov90023105m.g	Xetrov90023105m.g		Late_Repressed	AnimalCap_Avg	NA	0.0489182	1.43235	1.48841	2.19398	3.49533	NA
Xetrov90023664m.g	Xetrov90023664m.g		Late_Activated	Not Enriched in any Gastrula Dissections	0.897021	-0.222002	-0.159312	-0.255072	-1.23644	0.695801	NA
Xetrov90023892m.g	Xetrov90023892m.g		Early_Repressed	Lateral_MZ_Avg	NA	2.11605	1.50102	0.407895	NA	NA	NA
Xetrov90023893m.g	LOC108648809		Early_Repressed	Ventral_MZ_Avg,Lateral_MZ_Avg	1.21967	0.444832	0.155032	-0.0209113	0.0231193	0.0590012	NA
Xetrov90023927m.g	Xetrov90023927m.g		Late_Activated	VegetalMass_Avg	-0.00563927	-0.0765666	-0.0566564	-1.01787	0.420421	-0.0883059	NA
Xetrov90023968m.g	Xetrov90023968m.g		Early_Repressed	VegetalMass_Avg	-0.391009	-0.0346165	1.38773	0.0455352	-0.0221568	-0.2331	NA
Xetrov90024187m.g	Xetrov90024187m.g		Late_Repressed	VegetalMass_Avg	NA	NA	0.553475	0.856386	1.10313	0.354184	Chr09:58741027-58741409,Chr09:58748760-58749010
Xetrov90024190m.g	Xetrov90024190m.g		Late_Repressed	Not Expressed in Gastrula Dissections	NA	NA	NA	0.276294	1.64807	0.818806	NA
Xetrov90024221m.g	Xetrov90024221m.g		Late_Activated	VegetalMass_Avg	NA	0.156967	0.140111	0.574489	-0.667345	-1.81706	NA
Xetrov90024231m.g	Xetrov90024231m.g		Early_Repressed	Not Enriched in any Gastrula Dissections	0.840771	1.6078	1.81708	1.20761	1.04359	0.571094	NA
Xetrov90024392m.g	Xetrov90024392m.g		Early_Repressed	Not Enriched in any Gastrula Dissections	0.28845	-0.744275	1.23907	-0.398147	-1.05499	0.866093	NA
Xetrov90024523m.g	tuba1a		Early_Repressed	AnimalCap_Avg	5.98359	1.58797	0.167601	-0.319767	-0.0662396	-0.250447	NA
Xetrov90024562m.g	Xetrov90024562m.g		Not_Annotated	Lateral_MZ_Avg	-0.0428016	0.744054	-0.499656	1.2861	-1.21111	1.01631	NA
Xetrov90024753m.g	snx11		Late_Repressed	VegetalMass_Avg	-0.212811	-0.634942	-0.613996	1.30024	-0.826487	0.303369	NA
Xetrov90025218m.g	LOC101731483		Late_Activated	Not Enriched in any Gastrula Dissections	-0.534855	-0.251892	-0.268227	0.0240771	-1.79745	0.481948	NA
Xetrov90025681m.g	Xetrov90025681m.g		Late_Repressed	Ventral_MZ_Avg,Lateral_MZ_Avg	0.377603	1.114	1.09145	1.71008	0.310116	0.00507249	NA
Xetrov90025755m.g	slco1b3		Late_Activated	Not Enriched in any Gastrula Dissections	NA	NA	NA	-1.60466	-0.595119	-1.72661	NA
Xetrov90025899m.g	LOC100488381		Late_Repressed	VegetalMass_Avg	NA	-0.794822	-0.0410316	-0.594355	1.40034	-0.139525	NA
Xetrov90025922m.g	Xetrov90025922m.g		Late_Repressed	Not Enriched in any Gastrula Dissections	0.260814	0.588474	0.59733	1.48586	1.68236	2.13534	NA
Xetrov90025978m.g	Xetrov90025978m.g		Early_Repressed	VegetalMass_Avg	2.74517	NA	0.812259	-0.178228	NA	NA	NA
Xetrov90026016m.g	Xetrov90026016m.g		Not_Annotated	VegetalMass_Avg	0.898939	1.50141	-0.3588	-5.36916	1.0157	0.185062	NA
Xetrov90026054m.g	LOC100498570		Early_Activated	Not Expressed in Gastrula Dissections	-1.11247	-2.14324	0.0241241	NA	NA	-5.95221	NA
Xetrov90026071m.g	Xetrov90026071m.g		Late_Repressed	Not Enriched in any Gastrula Dissections	NA	NA	0.321414	2.259	-0.178136	0.29709	NA
Xetrov90026268m.g	LOC100490328		Not_Annotated	AnimalCap_Avg	NA	NA	NA	-3.97323	3.35782	-0.321793	NA
Xetrov90026378m.g	LOC100497241		Not_Annotated	Ventral_MZ_Avg	2.19618	4.53104	-0.578353	1.41166	-3.29232	0.837345	NA
Xetrov90026380m.g	hist1h2bj		Not_Annotated	Not Enriched in any Gastrula Dissections	-1.91933	0.102494	1.3495	0.531537	0.935843	0.370541	NA
Xetrov90026381m.g	LOC108644455		Early_Activated	Not Enriched in any Gastrula Dissections	-6.66498	-1.44114	0.117143	0.879168	NA	NA	NA
Xetrov90026382m.g	LOC100495663		Early_Activated	Not Enriched in any Gastrula Dissections	-1.86853	-0.295636	-1.37769	-0.767056	-0.865301	-0.182823	NA
Xetrov90026452m.g	Xetrov90026452m.g		Early_Repressed	Not Expressed in Gastrula Dissections	0.380628	NA	8.2286	NA	NA	NA	NA
Xetrov90026460m.g	Xetrov90026460m.g		Late_Repressed	Not Expressed in Gastrula Dissections	NA	NA	NA	1.52807	-1.27634	5.86646	NA
Xetrov90026463m.g	Xetrov90026463m.g		Early_Repressed	Lateral_MZ_Avg	NA	-0.0751443	1.64926	-0.368381	0.288816	2.33124	NA
Xetrov90026467m.g	Xetrov90026467m.g		Early_Repressed	Dorsal_MZ_Avg	NA	0.17291	1.57653	0.494492	0.243152	2.60324	NA
Xetrov90026469m.g	Xetrov90026469m.g		Early_Repressed	Not Expressed in Gastrula Dissections	NA	-1.3708	1.57594	-0.414909	-0.54522	2.64725	NA
Xetrov90026607m.g	LOC100491383		Late_Activated	Not Enriched in any Gastrula Dissections	0.880601	0.929961	0.295816	-1.29064	-0.7307	2.84187	NA
Xetrov90026612m.g	Xetrov90026612m.g		Late_Activated	Not Enriched in any Gastrula Dissections	NA	0.1812	-0.466828	-0.819995	0.370191	-1.31348	NA
Xetrov90026615m.g	Xetrov90026615m.g		Late_Activated	Not Enriched in any Gastrula Dissections	NA	-0.612245	-0.913184	-0.739194	0.0113826	-1.33554	NA
Xetrov90026650m.g	Xetrov90026650m.g		Late_Repressed	AnimalCap_Avg	NA	-1.06339	2.91088	0.0882796	1.25933	0.802839	NA
Xetrov90026651m.g	Xetrov90026651m.g		Early_Repressed	AnimalCap_Avg	1.71478	-0.743915	2.57738	0.526073	1.49472	0.0447142	NA
Xetrov90026652m.g	Xetrov90026652m.g		Not_Annotated	AnimalCap_Avg	1.32658	-1.02505	2.89129	0.686829	1.27957	0.229871	NA
Xetrov90026678m.g	Xetrov90026678m.g		Early_Activated	AnimalCap_Avg	NA	NA	-1.4637	-0.633397	-0.093094	-1.05328	NA
Xetrov90026703m.g	LOC101730266		Late_Activated	Dorsal_MZ_Avg,VegetalMass_Avg	NA	NA	0.0845465	-6.341	-0.467766	0.119879	NA
Xetrov90026715m.g	LOC105946021		Late_Activated	Ventral_MZ_Avg,Dorsal_MZ_Avg	NA	NA	NA	-0.888459	-1.3998	-1.55568	scaffold_1697:40451-40952
Xetrov90026785m.g	Xetrov90026785m.g		Late_Activated	AnimalCap_Avg	NA	0.17761	-0.292372	-0.600389	-1.1007	-0.397139	NA
Xetrov90026797m.g	Xetrov90026797m.g		Not_Annotated	Ventral_MZ_Avg,Lateral_MZ_Avg	2.12199	0.901404	-0.572482	-1.77931	-2.32245	-2.29759	NA
Xetrov90026822m.g	Xetrov90026822m.g		Early_Repressed	Ventral_MZ_Avg	1.06947	2.63599	-0.218205	1.02127	NA	2.72999	NA
Xetrov90026850m.g	Xetrov90026850m.g		Late_Repressed	Not Enriched in any Gastrula Dissections	0.0526783	0.776989	0.0969966	1.22566	0.48048	-0.3187	scaffold_1867:14417-14718
Xetrov90026858m.g	LOC105946039		Early_Repressed	AnimalCap_Avg,VegetalMass_Avg	3.21454	0.515766	NA	0.465507	NA	NA	NA
Xetrov90027062m.g	Xetrov90027062m.g		Early_Activated	Ventral_MZ_Avg	NA	-5.5168	0.0111714	NA	NA	NA	NA
Xetrov90027081m.g	Xetrov90027081m.g		Early_Repressed	Not Enriched in any Gastrula Dissections	5.70926	0.429972	0.892847	0.401897	0.112131	0.527785	NA
Xetrov90027223m.g	Xetrov90027223m.g		Late_Activated	AnimalCap_Avg,Ventral_MZ_Avg	NA	NA	NA	NA	NA	-2.52014	NA
Xetrov90027278m.g	Xetrov90027278m.g		Early_Repressed	VegetalMass_Avg	0.791047	1.06158	0.258094	-0.817497	-0.806574	-0.364032	NA
Xetrov90027280m.g	Xetrov90027280m.g		Early_Repressed	Dorsal_MZ_Avg	2.601	-0.126641	0.449194	0.0438877	-0.0645718	-0.935742	NA
Xetrov90027344m.g	LOC108645176		Late_Activated	Not Enriched in any Gastrula Dissections	-0.111756	-0.433649	-0.174009	-1.66127	0.443246	NA	NA
Xetrov90027378m.g	Xetrov90027378m.g		Late_Repressed	VegetalMass_Avg	-0.598464	0.472106	0.181176	-0.00467498	1.34489	0.921439	NA
Xetrov90027386m.g	LOC100495709		Early_Repressed	VegetalMass_Avg	1.2917	-0.481599	1.01266	0.412771	0.574071	-0.776292	NA
Xetrov90027388m.g	LOC100496030		Late_Repressed	VegetalMass_Avg	-0.715074	0.0171262	-0.256717	0.615321	1.11453	-0.104056	NA
Xetrov90027392m.g	Xetrov90027392m.g		Late_Activated	Dorsal_MZ_Avg	-1.11761	0.0154223	0.727479	0.100975	0.905471	-1.2674	scaffold_236:75190-75628,scaffold_236:80025-80247,scaffold_236:88381-89586
Xetrov90027393m.g	Xetrov90027393m.g		Late_Repressed	Not Expressed in Gastrula Dissections	NA	NA	NA	NA	5.65147	NA	scaffold_236:80025-80247
Xetrov90027395m.g	Xetrov90027395m.g		Late_Activated	Dorsal_MZ_Avg	-0.998823	-0.0383499	0.519364	-0.0591467	1.19305	-1.61088	scaffold_236:95115-95943,scaffold_236:100696-101045
Xetrov90027438m.g	Xetrov90027438m.g		Late_Repressed	AnimalCap_Avg,Dorsal_MZ_Avg	0.201898	NA	0.16585	-0.370365	3.18452	-2.47219	NA
Xetrov90027459m.g	Xetrov90027459m.g		Late_Activated	VegetalMass_Avg	-0.0084853	-0.506708	-0.944157	-1.58288	-0.470922	-0.521287	NA
Xetrov90027540m.g	Xetrov90027540m.g		Early_Activated	VegetalMass_Avg	-1.19464	-0.681569	-0.787774	-0.101338	-0.354167	-0.552636	NA
Xetrov90027567m.g	Xetrov90027567m.g		Late_Activated	Not Enriched in any Gastrula Dissections	NA	NA	NA	-2.66861	-0.15313	-2.13949	NA
Xetrov90027574m.g	Xetrov90027574m.g		Late_Repressed	Not Enriched in any Gastrula Dissections	NA	NA	0.880538	0.953139	2.33136	2.99623	NA
Xetrov90027581m.g	Xetrov90027581m.g		Early_Activated	Not Enriched in any Gastrula Dissections	-1.29534	-1.21261	-1.14911	-1.27956	-0.97529	-0.70242	NA
Xetrov90027601m.g	Xetrov90027601m.g		Late_Activated	Ventral_MZ_Avg,VegetalMass_Avg	NA	0.108709	0.330794	-0.335096	-1.41186	0.365575	NA
Xetrov90027633m.g	Xetrov90027633m.g		Late_Activated	Not Enriched in any Gastrula Dissections	0.948343	0.562676	1.48954	-1.63149	-0.461241	0.181449	NA
Xetrov90027684m.g	Xetrov90027684m.g		Late_Activated	Not Enriched in any Gastrula Dissections	0.790128	-0.0194865	-0.942276	-0.545866	-2.9729	-0.233355	NA
Xetrov90027709m.g	LOC101731741		Late_Activated	VegetalMass_Avg	NA	NA	2.20136	0.952011	-2.35452	NA	NA
Xetrov90027822m.g	Xetrov90027822m.g		Late_Activated	Not Expressed in Gastrula Dissections	NA	NA	NA	NA	-2.52625	-4.10409	scaffold_285:71814-72985
Xetrov90027871m.g	Xetrov90027871m.g		Late_Activated	Not Enriched in any Gastrula Dissections	NA	NA	NA	-0.366414	-0.726789	-2.28602	NA
Xetrov90027890m.g	Xetrov90027890m.g		Not_Annotated	VegetalMass_Avg	NA	2.09568	-6.38173	-0.0308756	0.175089	0.539043	NA
Xetrov90027899m.g	Xetrov90027899m.g		Late_Activated	Not Enriched in any Gastrula Dissections	0.790128	-0.0194865	-0.942276	-0.545866	-2.9729	-0.233355	NA
Xetrov90027925m.g	LOC101734509		Early_Repressed	Not Enriched in any Gastrula Dissections	1.80358	2.63104	1.32408	1.19016	0.671923	0.898359	NA
Xetrov90027973m.g	LOC101730700		Early_Repressed	AnimalCap_Avg,VegetalMass_Avg	NA	0.613774	2.27519	NA	NA	NA	NA
Xetrov90028058m.g	Xetrov90028058m.g		Late_Repressed	Lateral_MZ_Avg,VegetalMass_Avg	NA	NA	NA	NA	NA	1.9322	NA
Xetrov90028098m.g	LOC105945720		Early_Activated	Dorsal_MZ_Avg	-6.12561	0.594332	0.169591	-0.419877	-0.176767	0.0277431	NA
Xetrov90028145m.g	LOC100489138		Late_Repressed	AnimalCap_Avg	NA	NA	0.370448	-0.27762	0.780112	1.59294	NA
Xetrov90028178m.g	Xetrov90028178m.g		Early_Repressed	VegetalMass_Avg	NA	NA	2.16488	-1.07455	NA	-0.116379	NA
Xetrov90028183m.g	Xetrov90028183m.g		Early_Repressed	VegetalMass_Avg	0.0412584	-0.649298	1.0454	1.34795	0.28083	-0.309439	NA
Xetrov90028249m.g	Xetrov90028249m.g		Late_Activated	Not Enriched in any Gastrula Dissections	1.31955	-0.816497	0.170766	-4.14864	-1.01879	0.316638	scaffold_351:132509-132687
Xetrov90028250m.g	LOC100492873		Early_Repressed	Not Enriched in any Gastrula Dissections	-0.0900951	0.43378	1.35022	-1.08495	-0.227601	-0.219985	NA
Xetrov90028253m.g	Xetrov90028253m.g		Not_Annotated	Dorsal_MZ_Avg	NA	-0.331755	1.71399	0.438927	-2.43026	1.04256	NA
Xetrov90028257m.g	Xetrov90028257m.g		Early_Repressed	Not Enriched in any Gastrula Dissections	1.69991	0.220374	0.819121	0.447943	-0.081243	0.298552	scaffold_351:192541-192856
Xetrov90028455m.g	osr1.2	TF	Late_Activated	VegetalMass_Avg	NA	0.310106	0.607834	0.313896	-0.199166	-1.14973	NA
Xetrov90028566m.g	LOC108645242		Late_Repressed	Not Expressed in Gastrula Dissections	NA	-0.825953	NA	NA	1.88244	NA	NA
Xetrov90028573m.g	Xetrov90028573m.g		Late_Activated	Not Enriched in any Gastrula Dissections	-0.121123	-0.200106	-0.53092	-4.11546	-1.35754	-0.956197	NA
Xetrov90028577m.g	LOC100494316		Late_Activated	Not Enriched in any Gastrula Dissections	1.17091	NA	0.128865	-6.93585	0.626277	NA	NA
Xetrov90028578m.g	LOC101731295		Late_Activated	Not Enriched in any Gastrula Dissections	1.17091	NA	0.128865	-6.93585	0.626277	NA	NA
Xetrov90028579m.g	Xetrov90028579m.g		Not_Annotated	Ventral_MZ_Avg	-0.66904	3.11493	0.522065	-1.05178	-1.18127	0.822179	NA
Xetrov90028731m.g	Xetrov90028731m.g		Late_Activated	Not Expressed in Gastrula Dissections	NA	0.441579	-0.0868097	NA	-6.30549	NA	NA
Xetrov90028747m.g	Xetrov90028747m.g		Late_Repressed	Lateral_MZ_Avg	NA	NA	0.623453	0.154653	0.790719	2.88085	NA
Xetrov90028753m.g	Xetrov90028753m.g		Late_Activated	Not Enriched in any Gastrula Dissections	0.0154577	-0.479469	-0.179665	-0.415056	-1.00673	-0.555546	NA
Xetrov90028770m.g	Xetrov90028770m.g		Late_Activated	Dorsal_MZ_Avg	NA	NA	0.480569	0.495132	-0.552443	-3.10578	NA
Xetrov90028777m.g	Xetrov90028777m.g		Late_Activated	Lateral_MZ_Avg	NA	NA	NA	0.451812	-0.729745	-5.47293	NA
Xetrov90028786m.g	Xetrov90028786m.g		Late_Activated	AnimalCap_Avg	NA	1.57625	-0.46743	0.333933	-1.18392	-0.304644	NA
Xetrov90028787m.g	Xetrov90028787m.g		Late_Activated	Ventral_MZ_Avg,Lateral_MZ_Avg	NA	NA	0.56331	-0.537874	-2.16408	-0.307304	NA
Xetrov90028790m.g	fblim1		Late_Activated	AnimalCap_Avg	NA	NA	NA	-0.937284	-1.42541	-1.11612	NA
Xetrov90028819m.g	tectb		Late_Activated	AnimalCap_Avg	NA	NA	-1.08334	-0.833528	-0.823371	-1.50709	NA
Xetrov90028820m.g	Xetrov90028820m.g		Late_Activated	Lateral_MZ_Avg	NA	NA	0.550804	0.176777	-1.29761	-0.513549	NA
Xetrov90028824m.g	LOC100496354		Late_Activated	Ventral_MZ_Avg	-0.383031	0.230994	NA	NA	-2.63095	NA	NA
Xetrov90028828m.g	LOC100497356		Early_Activated	Not Enriched in any Gastrula Dissections	-1.087	-1.20721	-1.4797	-0.0227373	-0.308233	-1.29045	NA
Xetrov90028860m.g	LOC100496293		Late_Activated	VegetalMass_Avg	-0.537219	-1.76282	-0.341075	-1.27908	-0.886536	-2.4769	NA
Xetrov90028861m.g	LOC108645256		Late_Activated	VegetalMass_Avg	NA	NA	0.801862	-2.06348	-2.4284	-3.13533	NA
Xetrov90028879m.g	Xetrov90028879m.g		Late_Repressed	Ventral_MZ_Avg,Lateral_MZ_Avg	NA	NA	NA	-0.393708	-0.13857	1.699	NA
Xetrov90028910m.g	LOC108645501		Late_Repressed	VegetalMass_Avg	-0.0727254	0.173247	-0.317596	0.864341	2.60658	-0.00144255	NA
Xetrov90028941m.g	Xetrov90028941m.g		Early_Repressed	Not Enriched in any Gastrula Dissections	2.82834	0.534393	1.86571	0.377137	2.67777	2.38986	NA
Xetrov90029188m.g	Xetrov90029188m.g		Early_Activated	AnimalCap_Avg	0.338596	-1.29127	-0.946765	0.535372	0.368916	0.628761	scaffold_50:570786-570958
Xetrov90029208m.g	arrb1		Late_Repressed	Not Enriched in any Gastrula Dissections	0.255944	-0.378291	-0.243583	-0.134493	1.01227	-0.137552	NA
Xetrov90029218m.g	Xetrov90029218m.g		Early_Activated	Not Enriched in any Gastrula Dissections	-1.05147	0.149097	-0.691388	-0.267443	0.192858	0.328495	NA
Xetrov90029265m.g	LOC101734016		Early_Repressed	Dorsal_MZ_Avg	7.55175	0.854717	0.279203	0.338206	-0.128021	0.16258	NA
Xetrov90029286m.g	Xetrov90029286m.g		Early_Activated	VegetalMass_Avg	NA	-2.46259	0.257342	-0.0308756	0.175089	-0.711196	NA
Xetrov90029325m.g	LOC101730918		Late_Repressed	Ventral_MZ_Avg,Dorsal_MZ_Avg	NA	0.0145403	NA	-0.108692	2.37456	-1.10224	NA
Xetrov90029327m.g	Xetrov90029327m.g		Late_Activated	AnimalCap_Avg	-2.96642	-3.57875	-0.351751	-0.293881	3.00735	-1.35609	NA
Xetrov90029353m.g	Xetrov90029353m.g		Late_Activated	Not Enriched in any Gastrula Dissections	0.393546	-0.704458	-1.61787	-1.14187	0.116245	-0.064151	NA
Xetrov90029354m.g	Xetrov90029354m.g		Early_Repressed	AnimalCap_Avg,Dorsal_MZ_Avg	NA	NA	1.81635	-0.717078	0.88642	-0.30226	NA
Xetrov90029410m.g	LOC105945821		Not_Annotated	VegetalMass_Avg	0.609655	-1.82101	0.652761	0.52519	1.14998	-0.0982676	scaffold_545:14275-14486
Xetrov90029505m.g	LOC101731006		Early_Activated	Not Expressed in Gastrula Dissections	NA	-2.13291	NA	NA	NA	NA	NA
Xetrov90029506m.g	Xetrov90029506m.g		Not_Annotated	Ventral_MZ_Avg,Dorsal_MZ_Avg	-1.86903	0.246422	2.09229	-1.15021	-1.23808	1.1153	NA
Xetrov90029508m.g	LOC100486720		Early_Activated	Ventral_MZ_Avg,VegetalMass_Avg	-1.50908	0.0411694	0.786483	NA	0.877295	1.74281	NA
Xetrov90029510m.g	LOC100496027		Early_Activated	Ventral_MZ_Avg,VegetalMass_Avg	-1.50908	0.0411694	0.786483	NA	0.877295	1.74281	NA
Xetrov90029513m.g	LOC100496181		Not_Annotated	Ventral_MZ_Avg	-0.66904	3.11493	0.522065	-1.05178	-1.18127	0.822179	NA
Xetrov90029515m.g	LOC100495870		Late_Activated	Not Enriched in any Gastrula Dissections	0.711325	0.0768594	-0.270116	-1.05007	0.654341	0.0704783	NA
Xetrov90029523m.g	Xetrov90029523m.g		Early_Activated	Not Expressed in Gastrula Dissections	NA	NA	-2.78394	NA	NA	NA	NA
Xetrov90029532m.g	Xetrov90029532m.g		Not_Annotated	Dorsal_MZ_Avg	-0.402253	2.8214	NA	0.656265	NA	-2.33108	NA
Xetrov90029533m.g	Xetrov90029533m.g		Late_Repressed	Not Enriched in any Gastrula Dissections	0.176892	0.111935	-0.678009	-0.610716	-0.834214	1.15641	NA
Xetrov90029534m.g	Xetrov90029534m.g		Early_Repressed	Dorsal_MZ_Avg	5.58446	0.891144	NA	-0.460051	0.0013667	-0.349026	NA
Xetrov90029536m.g	LOC101734931		Early_Activated	Not Enriched in any Gastrula Dissections	-0.901301	-1.30544	-0.423777	-0.529644	-1.02087	-0.675031	NA
Xetrov90029537m.g	Xetrov90029537m.g		Early_Activated	Ventral_MZ_Avg,VegetalMass_Avg	-1.50908	0.0411694	0.786483	NA	0.877295	1.74281	NA
Xetrov90029539m.g	Xetrov90029539m.g		Early_Activated	Ventral_MZ_Avg,VegetalMass_Avg	-1.50908	0.0411694	0.786483	NA	0.877295	1.74281	NA
Xetrov90029541m.g	LOC101735111		Not_Annotated	Dorsal_MZ_Avg	0.916397	2.72339	-0.288923	-0.599016	-2.25449	1.0404	NA
Xetrov90029542m.g	LOC101735164		Not_Annotated	Lateral_MZ_Avg	-7.33252	0.339725	1.33418	0.696604	3.71192	-1.75401	NA
Xetrov90029543m.g	Xetrov90029543m.g		Not_Annotated	Dorsal_MZ_Avg	-0.402253	2.8214	NA	0.656265	NA	-2.33108	scaffold_56:262597-262812
Xetrov90029544m.g	Xetrov90029544m.g		Early_Repressed	Ventral_MZ_Avg,Dorsal_MZ_Avg	NA	-1.66937	2.95837	-0.705776	-0.863105	NA	NA
Xetrov90029554m.g	Xetrov90029554m.g		Late_Activated	Ventral_MZ_Avg	NA	-1.51215	-0.256435	-0.580821	-1.66412	0.684204	NA
Xetrov90029560m.g	Xetrov90029560m.g		Early_Repressed	Ventral_MZ_Avg,VegetalMass_Avg	NA	0.636649	2.76631	3.69115	-0.352709	-0.383938	NA
Xetrov90029643m.g	Xetrov90029643m.g		Late_Repressed	Ventral_MZ_Avg	NA	0.124186	1.88793	-0.45192	0.237858	2.2396	NA
Xetrov90029682m.g	LOC101731195		Late_Repressed	Lateral_MZ_Avg	0.3479	-0.667538	-0.633702	1.41885	8.94999	-0.147722	NA
Xetrov90029695m.g	LOC108644796		Early_Repressed	Ventral_MZ_Avg	2.66531	-0.156337	1.08202	0.163668	NA	NA	NA
Xetrov90029697m.g	Xetrov90029697m.g		Early_Repressed	AnimalCap_Avg	-1.00598	0.756091	1.98958	1.21842	0.783128	0.830678	NA
Xetrov90029705m.g	Xetrov90029705m.g		Early_Activated	Not Enriched in any Gastrula Dissections	NA	-2.46259	0.257342	-0.0308756	0.175089	-0.711196	NA
Xetrov90029717m.g	LOC100491871		Early_Repressed	Not Expressed in Gastrula Dissections	NA	NA	5.97788	NA	NA	NA	NA
Xetrov90029799m.g	Xetrov90029799m.g		Early_Activated	Dorsal_MZ_Avg	-0.149623	-2.51986	-0.631051	NA	0.0758356	NA	scaffold_623:27931-28387
Xetrov90029829m.g	LOC108644799		Early_Activated	Not Enriched in any Gastrula Dissections	NA	NA	-6.31424	-7.51405	-0.130891	-0.039937	NA
Xetrov90029849m.g	Xetrov90029849m.g		Early_Activated	Not Expressed in Gastrula Dissections	NA	-5.7766	0.392234	NA	-0.492972	-2.10439	NA
Xetrov90029865m.g	Xetrov90029865m.g		Early_Activated	VegetalMass_Avg	NA	-0.850848	-1.63826	-6.02817	-1.03661	0.940697	scaffold_638:29440-29861
Xetrov90029895m.g	LOC101732063		Late_Activated	AnimalCap_Avg	NA	NA	NA	-6.97602	-1.17775	-3.30085	NA
Xetrov90029944m.g	Xetrov90029944m.g		Late_Activated	Dorsal_MZ_Avg	0.544929	0.200094	-0.283505	0.262512	-2.23099	-0.834248	NA
Xetrov90029960m.g	Xetrov90029960m.g		Not_Annotated	VegetalMass_Avg	-2.17086	-0.338795	0.164473	0.645107	1.59004	1.46143	NA
Xetrov90030023m.g	Xetrov90030023m.g		Not_Annotated	VegetalMass_Avg	-2.17086	-0.338795	0.164473	0.645107	1.59004	1.46143	NA
Xetrov90030069m.g	Xetrov90030069m.g		Late_Repressed	Not Enriched in any Gastrula Dissections	0.00549912	0.233243	-0.206541	-0.161481	1.18661	2.14308	NA
Xetrov90030179m.g	LOC105945882		Late_Repressed	Lateral_MZ_Avg	NA	NA	0.925248	1.59569	3.05941	NA	NA
Xetrov90030386m.g	LOC101733104		Early_Activated	Not Enriched in any Gastrula Dissections	0.0914958	0.243599	-1.14114	-0.49239	1.51968	-0.587087	NA
Xetrov90030428m.g	Xetrov90030428m.g		Late_Repressed	Not Enriched in any Gastrula Dissections	-0.252542	0.0276104	0.683535	1.47694	0.99835	1.21925	NA
Xetrov90030514m.g	Xetrov90030514m.g		Late_Activated	Not Enriched in any Gastrula Dissections	NA	0.0821662	1.14478	0.0759675	-0.10266	-1.80243	NA
Xetrov90030547m.g	LOC100487545		Late_Repressed	Dorsal_MZ_Avg,VegetalMass_Avg	NA	NA	0.0650894	1.38877	1.59568	NA	NA
Xetrov90030728m.g	Xetrov90030728m.g		Not_Annotated	VegetalMass_Avg	-2.17086	-0.338795	0.164473	0.645107	1.59004	1.46143	NA
Xetrov90030754m.g	Xetrov90030754m.g		Early_Activated	Not Expressed in Gastrula Dissections	NA	NA	-6.37319	NA	NA	0.506887	NA
Xetrov90030857m.g	Xetrov90030857m.g		Late_Activated	AnimalCap_Avg	NA	NA	NA	-2.1036	0.350455	0.124876	NA
Xetrov90030874m.g	LOC105945931		Late_Repressed	VegetalMass_Avg	NA	1.00188	0.287967	-0.504588	1.35237	-0.164875	NA
Xetrov90030916m.g	Xetrov90030916m.g		Late_Activated	Not Enriched in any Gastrula Dissections	-0.617615	1.11166	0.698283	-1.94759	1.0346	-0.232924	NA
Xetrov90030929m.g	LOC105947441		Early_Activated	VegetalMass_Avg	NA	-0.0873354	-1.99109	-0.572536	-0.285921	-6.44126	NA
Xetrov90030944m.g	Xetrov90030944m.g		Late_Activated	Not Enriched in any Gastrula Dissections	NA	NA	NA	NA	NA	-3.48398	NA
Xetrov90031003m.g	Xetrov90031003m.g		Late_Repressed	Not Expressed in Gastrula Dissections	NA	NA	-0.467116	NA	6.89421	-0.4985	NA
Xetrov90011960m.g	zbtb37	TF	Late_Repressed	VegetalMass_Avg	0.03746	-0.046259	0.399169	1.34602	0.767407	0.09029	NA
Xetrov90011505m.g	zfhx3	TF	Late_Repressed	Not Enriched in any Gastrula Dissections	-0.126621	0.104597	0.11468	0.411125	1.01217	-0.0153422	NA
Xetrov90016932m.g	zfhx4	TF	Late_Activated	AnimalCap_Avg	NA	NA	1.43617	0.101454	0.0823218	-1.24198	NA
Xetrov90012698m.g	rbsn		Late_Repressed	Not Enriched in any Gastrula Dissections	0.194048	0.207917	0.390832	0.744081	1.26421	0.972602	NA
Xetrov90007718m.g	zfyve28		Late_Repressed	VegetalMass_Avg	0.0114592	0.0993894	0.643468	1.39978	0.60867	-0.521637	NA
Xetrov90008192m.g	znf800	TF	Late_Activated	Not Enriched in any Gastrula Dissections	-0.142131	-0.0423421	0.144911	-0.36395	-0.513553	-1.37342	NA
